# Supplementary material for: Ruthenium(ii)-catalyzed intermolecular annulation of alkenyl sulfonamides with alkynes: access to bicyclic sultams
Source: Royal Society of Chemistry journal article supplement (doi:10.1039/d0cc00093k), 2020-01-01
Supplement: d0cc00093k1.pdf [file d0cc00093k1.pdf]

**Supporting Information For:**

**Ruthenium(II)-Catalyzed Intermolecular Annulation of Alkenyl  
Sulfonamides with Alkynes: Access to Azabicyclic Sultams**

Lei-Lei Qian,<sup>a,b</sup> Xiang-Ting Min,<sup>a,b</sup> Yan-Cheng Hu,<sup>a</sup> Bing-Xue Shen,<sup>a,b</sup> Sa-Na Yang,<sup>a,b</sup>

Boshun Wan,<sup>a</sup> and Qing-An Chen<sup>\*a</sup>

<sup>a</sup>*Dalian Institute of Chemical Physics, Chinese Academy of Sciences, 116023, Dalian, China*

<sup>b</sup>*University of Chinese Academy of Sciences, 100049, Beijing, China*

*\*E-mail: qachen@dicp.ac.cn*

**Table of Contents**

|                                                                                                              |     |
|--------------------------------------------------------------------------------------------------------------|-----|
| 1. General information.....                                                                                  | S2  |
| 2. General procedure for the preparation of alkynes.....                                                     | S2  |
| 3. General procedure for the preparation of homoallylic sulfonamides.....                                    | S2  |
| 4. General procedure for the generation of the fused sultams from homoallylic sulfonamides with alkynes..... | S2  |
| 5. General procedure for the generation of <b>4aa</b> .....                                                  | S3  |
| 6. General procedure for the generation of <b>5aa</b> .....                                                  | S3  |
| 7. Crystal structure of <b>3aa</b> .....                                                                     | S9  |
| 8. References.....                                                                                           | S10 |
| 9. Copy of NMR Spectra.....                                                                                  | S11 |

**1. General experimental details:** Commercially available reagents were used without further purification. Solvents were treated prior to use according to the standard methods.  $^1\text{H}$  NMR and  $^{13}\text{C}$  NMR spectra were recorded at room temperature in  $\text{CDCl}_3$  on 400 MHz instrument with tetramethylsilane (TMS) as internal standard. Flash column chromatography was performed on silica gel (200-300 mesh). All reactions were monitored by TLC or NMR analysis. HRMS data was obtained with Micromass HPLC-Q-TOF mass spectrometer (ESI) or Agilent 6540 Accurate-MS spectrometer (Q-TOF).

**2. General procedure for the preparation of alkynes<sup>1</sup>**

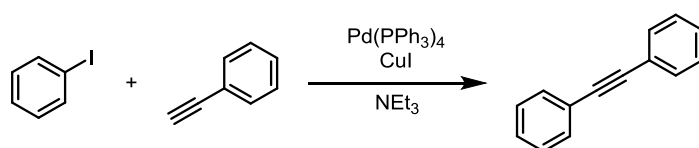

$\text{Pd(PPh}_3)_4$  (2 mol%),  $\text{CuI}$  (4 mol%),  $\text{Et}_3\text{N}$  (2.0 equiv.) and iodobenzene (1.1 equiv.) were dissolved in 10.0 mL DMF and heated to 80 °C. Subsequently, phenylacetylene (1.0 equiv.) was added to the resulting mixture by syringe, and the reaction was stirred under argon atmosphere for 10 h. After cooling to room temperature, the solvent was removed and extracted with  $\text{CH}_2\text{Cl}_2$  (4×50 mL). The combined organic layer was washed with brine, dried over  $\text{Na}_2\text{SO}_4$ , concentrated under reduced pressure to give crude alkyne. The residue was purified by silica gel flash chromatography using petroleum ether to afford the desired product.

**3. General procedure for the preparation of homoallylic sulfonamides<sup>2</sup>**

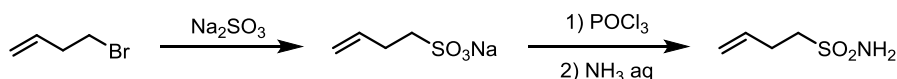

Homoallylic sulfonamides was prepared by a slightly modified procedure. 4-Bromobutene was refluxed with sodium sulfite (1.1 equiv.) for 12 h in water. After complete evaporation of solvent,  $\text{POCl}_3$  (10 equiv.) was added and reaction mixture was refluxed at 135 °C for 6 h. Then excess  $\text{POCl}_3$  was removed under vacuum. Residue was dissolved in acetonitrile and aq.  $\text{NH}_3$  was added at 0 °C after one hour of stirring at same temperature, water was added and reaction mixture was extracted with ethyl acetate. Organic layer was separated, washed with water and brine. After drying over  $\text{Na}_2\text{SO}_4$ , solvent was concentrated and purified using silica gel flash chromatography (30% ethyl acetate/ petroleum ether). Product was obtained as yellow oil (70%).

**4. General procedure for the generation of the fused sultams from homoallylic sulfonamides with alkynes**

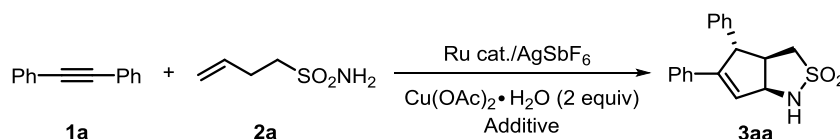

Under an argon atmosphere,  $[\text{Ru}(p\text{-cymene})\text{Cl}_2]_2$  (0.03 mmol),  $\text{AgSbF}_6$  (0.12 mmol),  $\text{Cu(OAc)}_2 \cdot \text{H}_2\text{O}$  (0.6 mmol) and  $\text{AcOH}$  (0.3 mmol) were added to a Schlenk tube in DCE (8.0 ml).

After stirring for 15 min, alkyne **1** (0.30 mmol) and homoallylic sulfonamides **2** (0.60 mmol) was added. The mixture was stirred at 80 °C for 16 h. The solvent was evaporated and the crude product was directly purified by flash column chromatography on silica gel (30% ethyl acetate/ petroleum ether) to give the desired product.

### 5. General procedure for the generation of 4aa

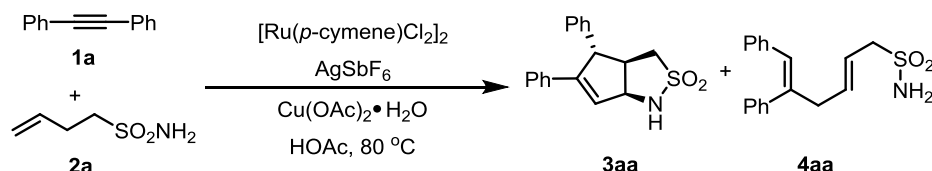

Under an argon atmosphere,  $[\text{Ru}(p\text{-cymene})\text{Cl}_2]_2$  (0.03 mmol),  $\text{AgSbF}_6$  (0.12 mmol) and  $\text{Cu}(\text{OAc})_2 \cdot \text{H}_2\text{O}$  (0.6 mmol) was added to a Schlenk tube in  $\text{AcOH}$  (2.0 ml). After stirring for 15 min, alkyne **2a** (0.60 mmol) and homoallylic sulfonamides **1a** (0.30 mmol) was added. The mixture was stirred at 80 °C for 16 h. The solvent was evaporated and the crude product was directly purified by flash column chromatography on silica gel (30% ethyl acetate/ petroleum ether) to give the desired product **3aa** (26% yield) and **6aa** (15% yield).

### 6. General procedure for the generation of 5aa

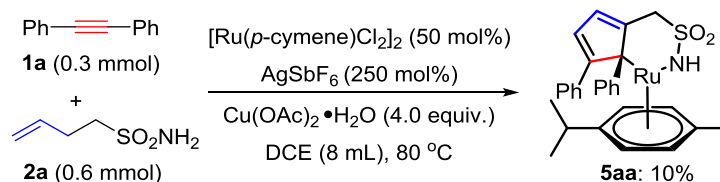

Under an argon atmosphere,  $[\text{Ru}(p\text{-cymene})\text{Cl}_2]_2$  (0.15 mmol),  $\text{AgSbF}_6$  (0.75 mmol) and  $\text{Cu}(\text{OAc})_2 \cdot \text{H}_2\text{O}$  (1.2 mmol) was added to a Schlenk tube in  $\text{DCE}$  (8.0 ml). After stirring for 15 min, alkyne **2a** (0.60 mmol) and homoallylic sulfonamides **1a** (0.30 mmol) was added. The mixture was stirred at 80 °C for 0.5 h. The solvent was evaporated and the crude product was directly purified by flash column chromatography on silica gel (5% methanol/ dichloromethane) to give the desired product **5aa** (10% yield).

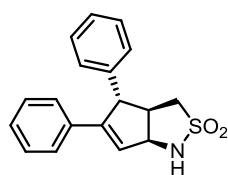

#### 4,5-Diphenyl-3,3a,4,6a-tetrahydro-1H-cyclopenta[c]isothiazole

**2,2-dioxide (3aa)**: white solid, 61.2 mg, 66% yield, m.p. 164 – 165 °C;  $^1\text{H NMR}$  (400 MHz,  $\text{CDCl}_3$ )  $\delta$  7.25 – 7.20 (m, 4H), 7.17 – 7.14 (m, 4H), 7.09 (d,  $J = 7.1$  Hz, 2H), 6.25 (s, 1H), 4.82 (dd,  $J = 7.6, 6.0$  Hz, 1H), 4.52 (d,  $J = 5.9$  Hz, 1H), 4.29 (s, 1H), 3.38 (dd,  $J = 12.4, 8.6$  Hz, 1H), 3.29 – 3.24 (m, 1H), 3.09 (dd,  $J = 12.4, 7.2$  Hz, 1H);  $^{13}\text{C NMR}$  (100 MHz,  $\text{CDCl}_3$ )  $\delta$  147.8, 142.2, 133.8, 129.3, 128.6, 128.5, 127.34, 127.25, 127.1, 125.6, 63.2, 57.9, 52.6, 49.5; **HRMS** calculated for  $\text{C}_{18}\text{H}_{18}\text{NO}_2\text{S}^+$   $[\text{M}+\text{H}]^+$  312.1053, found 312.1053.

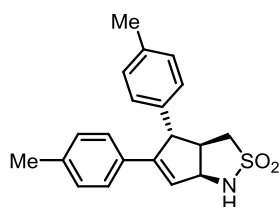

#### 4,5-Di-p-tolyl-3,3a,4,6a-tetrahydro-1H-cyclopenta[c]isothiazole

**2,2-dioxide (3ba)**: black solid, 59.2 mg, 58% yield, m.p. 87 – 88 °C;  $^1\text{H NMR}$  (400 MHz,  $\text{CDCl}_3$ )  $\delta$  7.22 (d,  $J = 7.9$  Hz, 2H), 7.09 – 7.02 (m, 6H), 6.24 (s, 1H), 4.85 (t,  $J = 6.6$  Hz, 1H), 4.75 (d,  $J = 5.8$  Hz,

1H), 4.28 (s, 1H), 3.42 (dd,  $J = 12.4, 8.6$  Hz, 1H), 3.27 (qd,  $J = 7.8, 2.8$  Hz, 1H), 3.11 (dd,  $J = 12.4, 7.5$  Hz, 1H), 2.29 (s, 3H), 2.28 (s, 3H);  $^{13}\text{C}$  NMR (100 MHz,  $\text{CDCl}_3$ )  $\delta$  147.5, 139.4, 138.4, 136.8, 131.0, 129.8, 129.2, 127.1, 127.0, 124.5, 63.2, 57.4, 52.5, 49.4, 21.3, 21.1; HRMS calculated for  $\text{C}_{20}\text{H}_{22}\text{NO}_2\text{S}^+ [\text{M}+\text{H}]^+$  340.1366, found 340.1375.

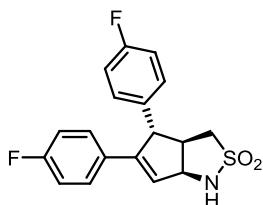

**4,5-Bis(4-fluorophenyl)-3,3a,4,6a-tetrahydro-1H-cyclopenta[c]isothiazole 2,2-dioxide (3ca):** white solid, 84.1 mg, 81% yield, m.p. 166 – 167 °C;  $^1\text{H}$  NMR (400 MHz,  $\text{CDCl}_3$ )  $\delta$  7.20 – 7.16 (m, 2H), 7.04 – 7.01 (m, 2H), 6.92 – 6.81 (m, 4H), 6.17 (s, 1H), 4.80 (d,  $J = 4.4$  Hz, 1H), 4.61 (s, 1H), 4.27 (s, 1H), 3.36 (dd,  $J = 12.3, 8.7$  Hz, 1H), 3.22 (qd,  $J = 7.5, 3.4$  Hz, 1H), 3.11 (dd,  $J = 12.4, 6.6$  Hz, 1H);  $^{13}\text{C}$  NMR (100

MHz,  $\text{CDCl}_3$ )  $\delta$  162.8 (d,  $J = 249.2$  Hz), 162.1 (d,  $J = 246.3$  Hz), 146.8, 137.8 (d,  $J = 3.3$  Hz), 129.8 (d,  $J = 3.4$  Hz), 128.9 (d,  $J = 5.7$  Hz), 128.8 (d,  $J = 5.5$  Hz), 125.6, 116.3 (d,  $J = 21.5$  Hz), 115.7 (d,  $J = 21.6$  Hz), 63.1, 57.3, 52.6, 49.4;  $^{19}\text{F}$  NMR (376 MHz,  $\text{CDCl}_3$ )  $\delta$  -112.38, -115.00; HRMS calculated for  $\text{C}_{18}\text{H}_{16}\text{F}_2\text{NO}_2\text{S}^+ [\text{M}+\text{H}]^+$  348.0864, found 348.0866.

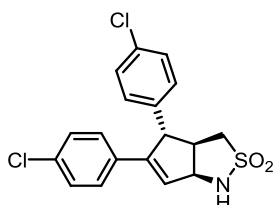

**4,5-Bis(4-chlorophenyl)-3,3a,4,6a-tetrahydro-1H-cyclopenta[c]isothiazole 2,2-dioxide (3da):** white solid, 92.4 mg, 81% yield, m.p. 161 – 162 °C;  $^1\text{H}$  NMR (400 MHz,  $\text{CDCl}_3$ )  $\delta$  7.38 – 7.12 (m, 6H), 7.05 (d,  $J = 7.9$  Hz, 2H), 6.27 (s, 1H), 4.84 (s, 2H), 4.32 (s, 1H), 3.40 (dd,  $J = 11.7, 9.0$  Hz, 1H), 3.25 (s, 1H), 3.17 (dd,  $J = 12.1, 6.0$  Hz, 1H);  $^{13}\text{C}$  NMR (100 MHz,  $\text{CDCl}_3$ )  $\delta$  146.5, 140.6, 134.5, 133.3, 132.1, 129.5,

128.8, 128.6, 128.3, 126.7, 63.1, 57.3, 52.5, 49.2; HRMS calculated for  $\text{C}_{18}\text{H}_{16}\text{Cl}_2\text{NO}_2\text{S}^+ [\text{M}+\text{H}]^+$  380.0273, found 380.0285.

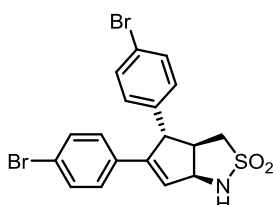

**4,5-Bis(4-bromophenyl)-3,3a,4,6a-tetrahydro-1H-cyclopenta[c]isothiazole 2,2-dioxide (3ea):** white solid, 97.6 mg, 69% yield, m.p. 186 – 187 °C;  $^1\text{H}$  NMR (400 MHz,  $\text{CDCl}_3$ )  $\delta$  7.41 – 7.34 (m, 4H), 7.13 (d,  $J = 8.2$  Hz, 2H), 7.00 (d,  $J = 8.1$  Hz, 2H), 6.31 (s, 1H), 4.86 (d,  $J = 6.5$  Hz, 1H), 4.56 (d,  $J = 5.8$  Hz, 1H), 4.33 (s, 1H), 3.42 (dd,  $J = 12.2, 8.7$  Hz, 1H), 3.34 – 3.24 (m, 1H), 3.18 (dd,  $J = 12.3, 6.2$  Hz, 1H);  $^{13}\text{C}$  NMR (100 MHz,  $\text{CDCl}_3$ )  $\delta$  146.7, 141.0, 132.5, 132.4, 131.9, 129.0, 128.6, 126.7, 122.9, 121.4,

63.1, 57.3, 52.6, 49.3; HRMS calculated for  $\text{C}_{18}\text{H}_{16}\text{Br}_2\text{NO}_2\text{S}^+ [\text{M}+\text{H}]^+$  467.9263, found 467.9278.

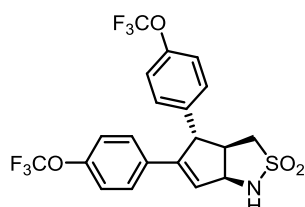

**4,5-Bis(4-(trifluoromethoxy)phenyl)-3,3a,4,6a-tetrahydro-1H-cyclopenta[c]isothiazole 2,2-dioxide (3fa):** white solid, 81.2 mg, 57% yield, m.p. 61 – 62 °C;  $^1\text{H}$  NMR (400 MHz,  $\text{CDCl}_3$ )  $\delta$  7.21 (d,  $J = 8.8$  Hz, 2H), 7.09 – 7.03 (m, 4H), 6.97 (d,  $J = 8.2$  Hz, 2H), 6.22 (s, 1H), 4.94 (s, 1H), 4.79 (d,  $J = 6.2$  Hz, 1H), 4.30 (s, 1H), 3.32 (dd,  $J = 12.3, 8.6$  Hz, 1H), 3.28 – 3.16 (m, 1H), 3.11 (dd,  $J = 12.3, 6.1$  Hz,

1H);  $^{13}\text{C}$  NMR (100 MHz,  $\text{CDCl}_3$ )  $\delta$  149.2 (q,  $J = 1.8$  Hz), 148.5 (q,  $J = 1.8$  Hz), 146.0, 140.7, 132.3, 128.6, 128.5, 127.2, 121.8, 120.9, 120.5 (q,  $J = 257.6$  Hz), 120.4 (q,  $J = 257.6$  Hz), 63.1, 57.2, 52.5, 49.3;  $^{19}\text{F}$  NMR (376 MHz,  $\text{CDCl}_3$ )  $\delta$  -57.83, -57.91; HRMS calculated for  $\text{C}_{20}\text{H}_{16}\text{F}_6\text{NO}_4\text{S}^+ [\text{M}+\text{H}]^+$  480.0699, found 480.0684.

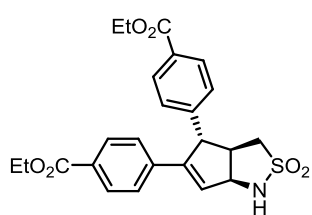

**Diethyl 4,4'-2,2-dioxido-3,3a,4,6a-tetrahydro-1H-cyclopenta[c]isothiazole-4,5-diyl)dibenzoate(3ga):** white solid; 44.0 mg, 32% yield, m.p. 120 – 121 °C;  $^1\text{H NMR}$  (400 MHz,  $\text{CDCl}_3$ )  $\delta$  7.92 (d,  $J$  = 8.1 Hz, 2H), 7.84 (d,  $J$  = 8.3 Hz, 2H), 7.30 (d,  $J$  = 8.3 Hz, 2H), 7.18 (d,  $J$  = 8.1 Hz, 2H), 6.41 (s, 1H), 5.10 (d,  $J$  = 6.2 Hz, 1H), 4.90 (t,  $J$  = 6.9 Hz, 1H), 4.47 (s, 1H), 4.34 – 4.29 (m, 4H), 3.40 (dd,  $J$  = 12.0, 8.6 Hz, 1H), 3.36 – 3.27 (m, 1H), 3.23 (dd,  $J$  = 12.1, 5.6 Hz, 1H), 1.35 – 1.30 (m, 6H);  $^{13}\text{C NMR}$  (100 MHz,  $\text{CDCl}_3$ )  $\delta$  166.2, 166.1, 147.2, 146.6, 137.9, 130.5, 130.2, 129.7, 129.6, 128.6, 127.3, 126.9, 63.2, 61.13, 61.10, 57.8, 52.5, 49.0, 14.34, 14.31; **HRMS** calculated for  $\text{C}_{24}\text{H}_{26}\text{NO}_6\text{S}^+$   $[\text{M}+\text{H}]^+$  456.1475, found 456.1475.

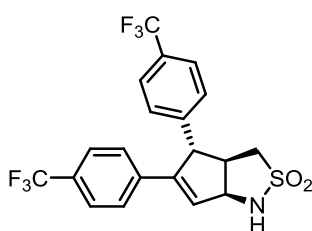

**4,5-Bis(4-(trifluoromethyl)phenyl)-3,3a,4,6a-tetrahydro-1H-cyclopenta[c]isothiazole 2,2-dioxide (3ha):** white solid, 24.1 mg, 26% yield, m.p. 182 – 183 °C;  $^1\text{H NMR}$  (400 MHz,  $\text{CDCl}_3$ )  $\delta$  7.55 (d,  $J$  = 7.9 Hz, 2H), 7.49 (d,  $J$  = 8.1 Hz, 2H), 7.37 (d,  $J$  = 8.1 Hz, 2H), 7.27 (d,  $J$  = 6.5 Hz, 2H), 6.44 (s, 1H), 4.93 (s, 1H), 4.73 (s, 1H), 4.51 (s, 1H), 3.43 (dd,  $J$  = 11.8, 8.7 Hz, 1H), 3.36 – 3.31 (m, 1H), 3.26 (dd,  $J$  = 12.0, 5.3 Hz, 1H);  $^{13}\text{C NMR}$  (100 MHz,  $\text{CDCl}_3$ )  $\delta$  146.3, 145.9, 136.9, 130.6 (q,  $J$  = 32.6 Hz), 130.0 (q,  $J$  = 32.5 Hz), 128.8, 127.7, 127.3, 126.5 (q,  $J$  = 3.7 Hz), 125.7 (q,  $J$  = 3.7 Hz), 124.0 (q,  $J$  = 271.85 Hz), 123.9 (q,  $J$  = 271.85 Hz), 63.1, 57.7, 52.6, 49.2;  $^{19}\text{F NMR}$  (376 MHz,  $\text{CDCl}_3$ )  $\delta$  -62.61, -62.83; **HRMS** calculated for  $\text{C}_{20}\text{H}_{16}\text{F}_6\text{NO}_2\text{S}^+$   $[\text{M}+\text{H}]^+$  448.0800, found 448.0806.

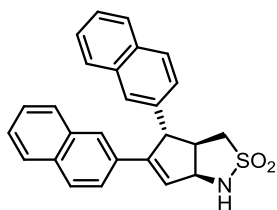

**4,5-Di(naphthalen-2-yl)-3,3a,4,6a-tetrahydro-1H-cyclopenta[c]isothiazole 2,2-dioxide (3ia):** light yellow solid, 74.5 mg, 60% yield, m.p. 115 – 120 °C;  $^1\text{H NMR}$  (400 MHz,  $\text{CDCl}_3$ )  $\delta$  7.68 – 7.50 (m, 9H), 7.41 – 7.29 (m, 4H), 7.16 (d,  $J$  = 8.4 Hz, 1H), 6.37 (s, 1H), 4.96 (d,  $J$  = 4.7 Hz, 1H), 4.86 – 4.85 (m, 1H), 4.51 (s, 1H), 3.36 (dd,  $J$  = 11.7, 8.8 Hz, 1H), 3.31 – 3.23 (m, 1H), 3.15 (dd,  $J$  = 12.0, 6.4 Hz, 1H);  $^{13}\text{C NMR}$  (100 MHz,  $\text{CDCl}_3$ )  $\delta$  147.1, 139.8, 133.6, 133.03, 132.99, 132.5, 131.2, 129.2, 128.4, 128.1, 127.72, 127.70, 127.6, 126.7, 126.6, 126.5, 126.4, 126.3, 126.0, 125.9, 125.1, 124.7, 63.3, 57.7, 52.5, 49.2; **HRMS** calculated for  $\text{C}_{26}\text{H}_{22}\text{NO}_2\text{S}^+$   $[\text{M}+\text{H}]^+$  412.1366, found 412.1360.

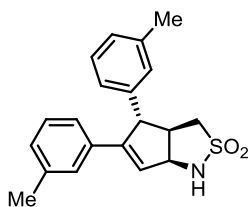

**4,5-Di-m-tolyl-3,3a,4,6a-tetrahydro-1H-cyclopenta[c]isothiazole 2,2-dioxide (3ja):** white solid, 49.0 mg, 43% yield, m.p. 105 – 106 °C;  $^1\text{H NMR}$  (400 MHz,  $\text{CDCl}_3$ )  $\delta$  7.20 – 7.08 (m, 4H), 7.03 (t,  $J$  = 6.4 Hz, 2H), 6.99 – 6.90 (m, 1H), 6.28 (t,  $J$  = 1.5 Hz, 1H), 4.89 – 4.85 (m, 1H), 4.73 (d,  $J$  = 5.9 Hz, 1H), 4.28 (s, 1H), 3.43 (dd,  $J$  = 12.4, 8.6 Hz, 1H), 3.38 – 3.23 (m, 1H), 3.12 (dd,  $J$  = 12.4, 7.4 Hz, 1H), 2.31 (s, 3H), 2.28 (s, 3H);  $^{13}\text{C NMR}$  (100 MHz,  $\text{CDCl}_3$ )  $\delta$  147.6, 142.3, 138.8, 138.0, 133.8, 129.3, 129.0, 128.4, 128.0, 127.9, 127.7, 125.4, 124.23, 124.21, 63.2, 57.8, 52.5, 49.4, 21.54, 21.49; **HRMS** calculated for  $\text{C}_{20}\text{H}_{22}\text{NO}_2\text{S}^+$   $[\text{M}+\text{H}]^+$  340.1366, found 340.1368.

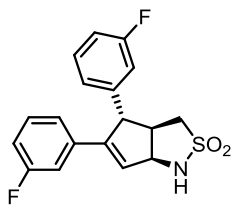

**4,5-Bis(3-fluorophenyl)-3,3a,4,6a-tetrahydro-1H-cyclopenta[c]isothiazole 2,2-dioxide (3ka):** white solid, 50.0 mg, 48% yield, m.p. 131 – 132 °C;  $^1\text{H NMR}$  (400 MHz,  $\text{CDCl}_3$ )  $\delta$  7.28 – 7.15 (m, 2H), 7.05 (d,  $J = 7.9$  Hz, 1H), 6.99 – 6.88 (m, 4H), 6.82 (d,  $J = 9.6$  Hz, 1H), 6.32 (s, 1H), 4.94 (d,  $J = 6.0$  Hz, 1H), 4.87 (t,  $J = 6.8$  Hz, 1H), 4.34 (s, 1H), 3.41 (dd,  $J = 12.3$ , 8.7 Hz, 1H), 3.33 – 3.26 (m, 1H), 3.19 (dd,  $J = 12.4$ , 6.2 Hz, 1H);  $^{13}\text{C NMR}$  (100 MHz,  $\text{CDCl}_3$ )  $\delta$  163.3(d,  $J = 247.2$  Hz), 162.7(d,  $J = 245.9$  Hz), 146.2 (d,  $J = 2.4$  Hz), 144.6 (d,  $J = 6.8$  Hz), 135.9 (d,  $J = 7.7$  Hz), 130.9 (d,  $J = 8.4$  Hz), 130.1 (d,  $J = 8.4$  Hz), 127.6, 123.0 (d,  $J = 2.8$  Hz), 122.8 (d,  $J = 2.8$  Hz), 115.5 (d,  $J = 21.3$  Hz), 114.5 (d,  $J = 21.1$  Hz), 114.0 (d,  $J = 21.6$  Hz), 113.9 (d,  $J = 22.2$  Hz), 63.0, 57.5 (d,  $J = 1.4$  Hz), 52.5, 49.1;  $^{19}\text{F NMR}$  (376 MHz,  $\text{CDCl}_3$ )  $\delta$  -111.71, -112.60; **HRMS** calculated for  $\text{C}_{18}\text{H}_{16}\text{F}_2\text{NO}_2\text{S}^+$   $[\text{M}+\text{H}]^+$  348.0864, found 348.0864.

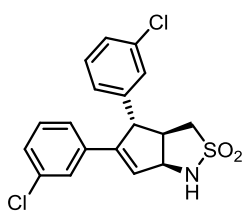

**4,5-Bis(3-chlorophenyl)-3,3a,4,6a-tetrahydro-1H-cyclopenta[c]isothiazole 2,2-dioxide (3la):** white solid, 51.6 mg, 45% yield, m.p. 72 – 73 °C;  $^1\text{H NMR}$  (400 MHz,  $\text{CDCl}_3$ )  $\delta$  7.31 (s, 1H), 7.23 – 7.09 (m, 6H), 7.02 (d,  $J = 6.8$  Hz, 1H), 6.30 (s, 1H), 4.96 (d,  $J = 6.1$  Hz, 1H), 4.87 (t,  $J = 6.9$  Hz, 1H), 4.32 (s, 1H), 3.40 (dd,  $J = 12.3$ , 8.7 Hz, 1H), 3.31 – 3.24 (m, 1H), 3.18 (dd,  $J = 12.3$ , 6.0 Hz, 1H);  $^{13}\text{C NMR}$  (100 MHz,  $\text{CDCl}_3$ )  $\delta$  145.9, 144.1, 135.4, 135.1, 134.5, 130.6, 129.9, 128.7, 127.8, 127.7, 127.2, 127.0, 125.5, 125.2, 63.0, 57.4, 52.5, 49.0; **HRMS** calculated for  $\text{C}_{18}\text{H}_{16}\text{Cl}_2\text{NO}_2\text{S}^+$   $[\text{M}+\text{H}]^+$  380.0273, found 380.0283.

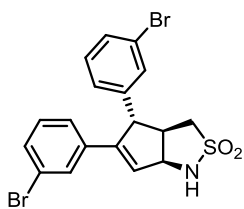

**4,5-Bis(3-bromophenyl)-3,3a,4,6a-tetrahydro-1H-cyclopenta[c]isothiazole 2,2-dioxide (3ma):** white solid, 66.0 mg, 47% yield, m.p. 80 – 81 °C;  $^1\text{H NMR}$  (400 MHz,  $\text{CDCl}_3$ )  $\delta$  7.48 (s, 1H), 7.35 – 7.32 (m, 2H), 7.27 (s, 1H), 7.16 – 7.12 (m, 2H), 7.07 (t,  $J = 7.9$  Hz, 2H), 6.29 (s, 1H), 4.93 (d,  $J = 6.1$  Hz, 1H), 4.87 (t,  $J = 6.9$  Hz, 1H), 4.30 (s, 1H), 3.39 (dd,  $J = 12.3$ , 8.7 Hz, 1H), 3.31 – 3.24 (m, 1H), 3.17 (dd,  $J = 12.4$ , 6.1 Hz, 1H);  $^{13}\text{C NMR}$  (100 MHz,  $\text{CDCl}_3$ )  $\delta$  145.8, 144.3, 135.7, 131.6, 130.9, 130.7, 130.2, 129.9, 127.9, 126.0, 125.6, 123.4, 122.7, 63.0, 57.4, 52.5, 49.0; **HRMS** calculated for  $\text{C}_{18}\text{H}_{16}\text{Br}_2\text{NO}_2\text{S}^+$   $[\text{M}+\text{H}]^+$  467.9263, found 467.9258.

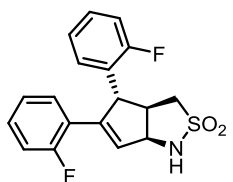

**4,5-Bis(2-fluorophenyl)-3,3a,4,6a-tetrahydro-1H-cyclopenta[c]isothiazole 2,2-dioxide (3na):** white solid, 21.1 mg, 20% yield, m.p. 138 – 139 °C;  $^1\text{H NMR}$  (400 MHz,  $\text{CDCl}_3$ )  $\delta$  7.22 – 7.12 (m, 3H), 7.06 – 6.94 (m, 5H), 6.48 (s, 1H), 4.91 (t,  $J = 6.8$  Hz, 1H), 4.79 (s, 1H), 4.57 (d,  $J = 6.0$  Hz, 1H), 3.49 (dd,  $J = 11.5$ , 7.6 Hz, 1H), 3.34 – 3.23 (m, 2H);  $^{13}\text{C NMR}$  (100 MHz,  $\text{CDCl}_3$ )  $\delta$  160.9 (d,  $J = 251.5$  Hz), 160.6 (d,  $J = 245.5$  Hz), 141.5 (d,  $J = 2.4$  Hz), 130.74 (d,  $J = 9.6$  Hz), 130.1 (d,  $J = 8.8$  Hz), 129.5 (d,  $J = 3.6$  Hz), 129.0 (d,  $J = 8.5$  Hz), 128.8, 128.3 (d,  $J = 4.0$  Hz), 124.7 (d,  $J = 3.6$  Hz), 124.3 (d,  $J = 3.5$  Hz), 121.8 (d,  $J = 12.5$  Hz), 116.3 (d,  $J = 22.8$  Hz), 115.8 (d,  $J = 21.9$  Hz), 63.6, 52.7, 51.5, 47.5;  $^{19}\text{F NMR}$  (376 MHz,  $\text{CDCl}_3$ )  $\delta$  -111.09, -118.23; **HRMS** calculated for  $\text{C}_{18}\text{H}_{16}\text{F}_2\text{NO}_2\text{S}^+$   $[\text{M}+\text{H}]^+$  348.0864, found 348.0861.

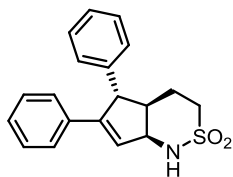

**5,6-Diphenyl-1,3,4,4a,5,7a-hexahydrocyclopenta[c][1,2]thiazine 2,2-dioxide (3ab):** white solid, 52 mg, 53% yield, m.p. 228 – 229 °C;  $^1\text{H NMR}$  (400 MHz,  $\text{CDCl}_3$ )  $\delta$  7.26 – 7.18 (m, 8H), 7.08 (d,  $J = 7.1$  Hz, 2H), 6.33 (s, 1H), 4.72 – 4.72 (m, 1H), 4.19 (d,  $J = 6.8$  Hz, 1H), 4.05 (d,  $J = 8.0$  Hz, 1H), 3.30 – 3.23 (m, 1H), 3.13 – 3.07 (m, 1H), 2.49 – 2.43 (m, 1H), 2.27 – 2.20 (m, 2H);  $^{13}\text{C NMR}$  (100 MHz,  $\text{CDCl}_3$ )  $\delta$  150.7, 141.4, 134.4, 129.0, 128.5, 128.4, 128.0, 127.1, 126.9, 126.6, 62.2, 53.7, 46.1, 45.5, 24.1; **HRMS** calculated for  $\text{C}_{19}\text{H}_{20}\text{NO}_2\text{S}^+$   $[\text{M}+\text{H}]^+$  326.1209, found 326.1217.

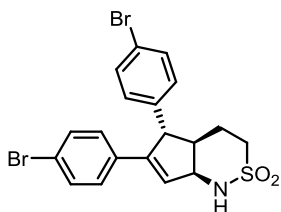

**5,6-Bis(4-bromophenyl)-1,3,4,4a,5,7a-hexahydrocyclopenta[c][1,2]thiazine 2,2-dioxide (3bb):** white solid, 95 mg, 63% yield, m.p. 258 – 259 °C;  $^1\text{H NMR}$  (400 MHz,  $\text{DMSO-d}_6$ )  $\delta$  7.43 (d,  $J = 8.0$  Hz, 4H), 7.22 (d,  $J = 8.1$  Hz, 2H), 7.10 (d,  $J = 8.0$  Hz, 2H), 6.74 (d,  $J = 7.8$  Hz, 1H), 6.42 (s, 1H), 4.49 (d,  $J = 7.1$  Hz, 1H), 4.32 (d,  $J = 6.5$  Hz, 1H), 3.29 – 3.22 (m, 1H), 3.05 – 2.99 (m, 1H), 2.28 – 2.22 (m, 1H), 2.09 – 1.97 (m, 2H);  $^{13}\text{C NMR}$  (100 MHz,  $\text{DMSO-d}_6$ )  $\delta$  147.0, 141.6, 134.1, 131.5, 131.2, 130.2, 128.6, 120.9, 119.6, 61.6, 52.3, 45.4, 44.7, 23.9; **HRMS** calculated for  $\text{C}_{19}\text{H}_{18}\text{Br}_2\text{NO}_2\text{S}^+$   $[\text{M}+\text{H}]^+$  481.9420, found 481.9392.

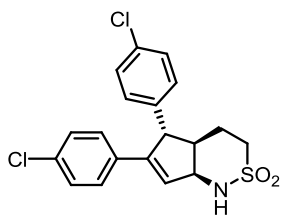

**5,6-Bis(4-chlorophenyl)-1,3,4,4a,5,7a-hexahydrocyclopenta[c][1,2]thiazine 2,2-dioxide (3cb):** white solid, 75 mg, 61% yield, m.p. 255 – 256 °C;  $^1\text{H NMR}$  (400 MHz,  $\text{DMSO-d}_6$ )  $\delta$  7.30 (d,  $J = 5.9$  Hz, 6H), 7.16 (d,  $J = 8.2$  Hz, 2H), 6.74 (d,  $J = 7.8$  Hz, 1H), 6.41 (t,  $J = 2.1$  Hz, 1H), 4.49 (t,  $J = 6.9$  Hz, 1H), 4.33 (d,  $J = 6.5$  Hz, 1H), 3.29 – 3.22 (m, 1H), 3.05 – 2.99 (m, 1H), 2.29 – 2.22 (m, 1H), 2.09 – 1.98 (m, 2H);  $^{13}\text{C NMR}$  (100 MHz,  $\text{DMSO-d}_6$ )  $\delta$  147.0, 141.2, 133.7, 132.2, 131.1, 129.7, 128.6, 128.5, 128.3, 128.3, 61.5, 52.3, 45.4, 44.7, 23.9; **HRMS** calculated for  $\text{C}_{19}\text{H}_{18}\text{Cl}_2\text{NO}_2\text{S}^+$   $[\text{M}+\text{H}]^+$  394.0430, found 394.0430.

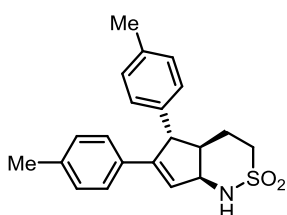

**5,6-Bis(4-methylphenyl)-1,3,4,4a,5,7a-hexahydrocyclopenta[c][1,2]thiazine 2,2-dioxide (3db):** light yellow solid, 51 mg, 46% yield, m.p. 258 – 259 °C;  $^1\text{H NMR}$  (400 MHz,  $\text{CDCl}_3$ )  $\delta$  7.14 (d,  $J = 8.2$  Hz, 2H), 7.05 (d,  $J = 7.8$  Hz, 2H), 7.00 (d,  $J = 7.9$  Hz, 2H), 6.96 (d,  $J = 7.9$  Hz, 2H), 6.28 (t,  $J = 2.3$  Hz, 1H), 4.71 (s, 1H), 4.11 (d,  $J = 7.0$  Hz, 1H), 3.87 (d,  $J = 8.1$  Hz, 1H), 3.25 (ddd,  $J = 13.6, 10.8, 3.9$  Hz, 1H), 3.11 (ddd,  $J = 13.7, 6.2, 4.2$  Hz, 1H), 2.51 – 2.42 (m, 1H), 2.28 (s, 3H), 2.26 (s, 3H), 2.23 – 2.18 (m, 2H);  $^{13}\text{C NMR}$  (100 MHz,  $\text{CDCl}_3$ )  $\delta$  150.8, 138.6, 138.3, 136.7, 131.6, 129.7, 129.2, 127.9, 126.8, 125.4, 62.2, 53.3, 46.2, 45.6, 24.1, 21.4, 21.2; **HRMS** calculated for  $\text{C}_{21}\text{H}_{24}\text{NO}_2\text{S}^+$   $[\text{M}+\text{H}]^+$  354.1522, found 354.1500.

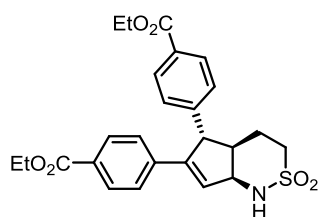

**Diethyl 4,4'-(2,2-dioxido-1,3,4,4a,5,7a-hexahydrocyclopenta[c][1,2]thiazine-5,6-diyl)dibenzoate (3eb):** light yellow solid, 53 mg, 38% yield, m.p. 232 – 233 °C;  $^1\text{H NMR}$  (400 MHz,  $\text{CDCl}_3$ )  $\delta$  7.91 (d,  $J = 8.1$  Hz, 2H), 7.84 (d,  $J = 8.2$  Hz, 2H), 7.26 (d,  $J = 8.4$

Hz, 2H), 7.14 (d,  $J = 8.2$  Hz, 2H), 6.42 (t,  $J = 2.2$  Hz, 1H), 4.77 – 4.63 (m, 1H), 4.56 (t,  $J = 7.1$  Hz, 1H), 4.35 – 4.28 (m, 5H), 3.30 (ddd,  $J = 14.0, 10.6, 3.7$  Hz, 1H), 3.09 (ddd,  $J = 13.8, 6.3, 4.2$  Hz, 1H), 2.51 – 2.42 (m, 1H), 2.28 – 2.18 (m, 2H), 1.36 – 1.32 (m, 6H);  $^{13}\text{C NMR}$  (100 MHz,  $\text{CDCl}_3$ )  $\delta$  166.3, 166.2, 149.5, 146.3, 138.6, 130.3, 130.1, 129.7, 129.5, 129.1, 128.0, 126.7, 62.2, 61.2, 61.1, 53.5, 45.7, 45.3, 24.0, 14.39, 14.36; **HRMS** calculated for  $\text{C}_{25}\text{H}_{31}\text{N}_2\text{O}_6\text{S}^+$   $[\text{M}+\text{NH}_4]^+$  487.1897, found 487.1880.

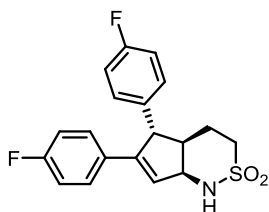

**5,6-Bis(4-fluorophenyl)-1,3,4,4a,5,7a-hexahydrocyclopenta[c][1,2]thiazine 2,2-dioxide (3fb)**: light yellow solid, 58 mg, 53% yield, m.p. 248 – 249 °C;  $^1\text{H NMR}$  (400 MHz,  $\text{DMSO-d}_6$ )  $\delta$  7.31 (dd,  $J = 8.6, 5.6$  Hz, 2H), 7.17 (dd,  $J = 8.4, 5.6$  Hz, 2H), 7.06 (t,  $J = 8.8$  Hz, 4H), 6.71 (d,  $J = 7.8$  Hz, 1H), 6.33 (s, 1H), 4.48 (t,  $J = 5.6$  Hz, 1H), 4.31 (d,  $J = 6.4$  Hz, 1H), 3.25 (ddd,  $J = 13.0, 9.4, 3.1$  Hz, 1H), 3.01 (ddd,  $J = 13.1, 6.5, 4.0$  Hz, 1H), 2.28 – 2.22 (m, 1H), 2.09 – 1.97 (m, 2H);  $^{13}\text{C NMR}$  (100 MHz,  $\text{DMSO-d}_6$ )  $\delta$  161.6 (d,  $J = 245.1$  Hz), 160.9 (d,  $J = 242.2$  Hz), 147.2, 138.4, 131.5 (d,  $J = 3.2$  Hz), 129.8 (d,  $J = 8.0$  Hz), 128.7 (d,  $J = 8.1$  Hz), 127.4, 115.4 (d,  $J = 21.2$  Hz), 115.2 (d,  $J = 21.2$  Hz), 61.6, 52.4, 45.5, 44.8, 24.1;  $^{19}\text{F NMR}$  (376 MHz,  $\text{DMSO-d}_6$ )  $\delta$  -113.81, -116.24; **HRMS** calculated for  $\text{C}_{19}\text{H}_{21}\text{F}_2\text{N}_2\text{O}_2\text{S}^+$   $[\text{M}+\text{NH}_4]^+$  379.1286, found 379.1309.

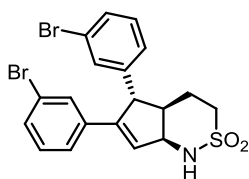

**5,6-Bis(3-bromophenyl)-1,3,4,4a,5,7a-hexahydrocyclopenta[c][1,2]thiazine 2,2-dioxide (3gb)**: light yellow solid, 75 mg, 52% yield, m.p. 197 – 198 °C;  $^1\text{H NMR}$  (400 MHz,  $\text{CDCl}_3$ )  $\delta$  7.45 (q,  $J = 1.3$  Hz, 1H), 7.36 – 7.31 (m, 2H), 7.24 (t,  $J = 1.8$  Hz, 1H), 7.14 (t,  $J = 7.8$  Hz, 1H), 7.10 – 7.05 (m, 2H), 7.00 (dt,  $J = 7.7, 1.3$  Hz, 1H), 6.35 (t,  $J = 2.2$  Hz, 1H), 4.72 (t,  $J = 6.6$  Hz, 1H), 4.19 (d,  $J = 7.9$  Hz, 1H), 4.12 (dt,  $J = 6.2, 1.7$  Hz, 1H), 3.25 (ddd,  $J = 13.7, 10.0, 3.8$  Hz, 1H), 3.10 (ddd,  $J = 13.8, 6.9, 4.1$  Hz, 1H), 2.51 – 2.42 (m, 1H), 2.28 – 2.17 (m, 2H);  $^{13}\text{C NMR}$  (100 MHz,  $\text{CDCl}_3$ )  $\delta$  148.3, 143.4, 136.3, 131.5, 130.9, 130.8, 130.6, 130.2, 129.8, 128.4, 126.5, 125.4, 123.2, 122.8, 62.0, 53.7, 46.2, 45.4, 24.4; **HRMS** calculated for  $\text{C}_{19}\text{H}_{18}\text{Br}_2\text{NO}_2\text{S}^+$   $[\text{M}+\text{H}]^+$  481.9420, found 481.9420.

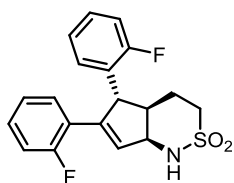

**5,6-Bis(2-fluorophenyl)-1,3,4,4a,5,7a-hexahydrocyclopenta[c][1,2]thiazine 2,2-dioxide (3hb)**: yellow solid, 52 mg, 48% yield, m.p. 232 – 233 °C;  $^1\text{H NMR}$  (400 MHz,  $\text{CDCl}_3$ )  $\delta$  7.20 – 7.12 (m, 3H), 7.04 – 6.87 (m, 5H), 6.43 (s, 1H), 4.71 – 4.73 (m, 2H), 4.14 (d,  $J = 7.9$  Hz, 1H), 3.36 – 3.29 (m, 1H), 3.13 (dt,  $J = 13.5, 4.8$  Hz, 1H), 2.56 – 2.46 (m, 1H), 2.29 – 2.18 (m, 2H);  $^{13}\text{C NMR}$  (100 MHz,  $\text{CDCl}_3$ )  $\delta$  161.1 (d,  $J = 244.7$  Hz), 160.3 (d,  $J = 250.6$  Hz), 145.7, 130.8 (d,  $J = 6.5$  Hz), 129.9 (d,  $J = 8.7$  Hz), 129.3 (d,  $J = 3.8$  Hz), 129.1 (d,  $J = 4.0$  Hz), 128.7 (d,  $J = 8.3$  Hz), 127.8 (d,  $J = 14.2$  Hz), 124.7 (d,  $J = 3.5$  Hz), 124.2 (d,  $J = 3.5$  Hz), 122.6 (d,  $J = 13.2$  Hz), 116.1 (d,  $J = 22.4$  Hz), 115.6 (d,  $J = 22.3$  Hz), 62.3, 46.4, 45.7, 44.4, 24.0;  $^{19}\text{F NMR}$  (376 MHz,  $\text{CDCl}_3$ )  $\delta$  -112.20, -119.83; **HRMS** calculated for  $\text{C}_{19}\text{H}_{18}\text{F}_2\text{NO}_2\text{S}^+$   $[\text{M}+\text{H}]^+$  362.1021, found 362.1049.

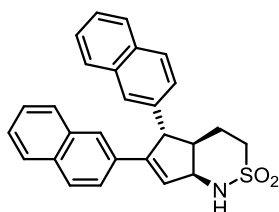

**5,6-Di(naphthalen-2-yl)-1,3,4,4a,5,7a-hexahydrocyclopenta[c][1,2]thiazine 2,2-dioxide (3ib)**: light yellow solid, 65 mg, 51% yield, m.p.



226 – 227 °C;  $^1\text{H NMR}$  (400 MHz,  $\text{CDCl}_3$ )  $\delta$  7.78 – 7.64 (m, 7H), 7.59 – 7.57 (m, 1H), 7.51 (dd,  $J = 8.6, 1.8$  Hz, 1H), 7.48 – 7.33 (m, 4H), 7.19 (dd,  $J = 8.5, 1.8$  Hz, 1H), 6.52 (t,  $J = 2.3$  Hz, 1H), 4.82 (ddt,  $J = 8.0, 5.7, 2.0$  Hz, 1H), 4.47 (dt,  $J = 7.3, 1.7$  Hz, 1H), 4.05 (d,  $J = 8.1$  Hz, 1H), 3.34 (ddd,  $J = 13.6, 10.4, 4.0$  Hz, 1H), 3.15 (ddd,  $J = 13.6, 6.6, 4.1$  Hz, 1H), 2.56 – 2.47 (m, 1H), 2.42 – 2.36 (m, 1H), 2.34 – 2.26 (m, 1H);  $^{13}\text{C NMR}$  (100 MHz,  $\text{CDCl}_3$ )  $\delta$  150.4, 139.0, 133.6, 133.11, 133.10, 132.6, 131.8, 129.1, 128.4, 128.2, 127.8, 127.7, 127.3, 126.9, 126.52, 126.47, 126.42, 126.39, 126.0, 125.6, 124.5, 62.3, 54.1, 46.3, 45.4, 24.3; **HRMS** calculated for  $\text{C}_{27}\text{H}_{24}\text{NO}_2\text{S}^+$   $[\text{M}+\text{H}]^+$  426.1522, found 426.1493.

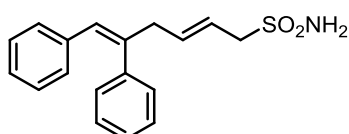

**5,6-Di(naphthalen-2-yl)-1,3,4,4a,5,7a-hexahydrocyclopenta[1,2]thiazine 2,2-dioxide (4aa)**: light yellow solid, 14% yield, m.p. 115 – 116 °C;  $^1\text{H NMR}$  (400 MHz,  $\text{CDCl}_3$ )  $\delta$  7.31 – 7.21 (m, 3H), 7.16 – 7.05 (m, 5H), 6.97 – 6.92 (m, 2H), 6.51 (s, 1H),

5.83 (dt,  $J = 14.7, 7.0$  Hz, 1H), 5.57 (dt,  $J = 14.9, 7.3$  Hz, 1H), 4.22 (s, 2H), 3.68 (d,  $J = 7.4$  Hz, 2H), 3.32 (d,  $J = 7.0$  Hz, 2H);  $^{13}\text{C NMR}$  (100 MHz,  $\text{CDCl}_3$ )  $\delta$  140.5, 140.0, 138.2, 136.9, 129.2, 128.9, 128.8, 128.2, 128.0, 127.4, 126.7, 120.1, 58.5, 43.5; **HRMS** calculated for  $\text{C}_{18}\text{H}_{23}\text{N}_2\text{O}_2\text{S}^+$   $[\text{M}+\text{NH}_4]^+$  331.1475, found 331.1464.

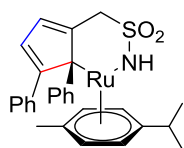

**((2,3-diphenylcyclopenta-3,5-dien-2-yl)methyl)sulfonyl)amide(p-toluenyl)ruthenium(II) (5aa)**: light yellow solid, 10% yield;  $^1\text{H NMR}$  (400 MHz,  $\text{CDCl}_3$ )  $\delta$  7.37 (s, 5H), 7.25 (d, 1H), 7.19 (t,  $J = 7.4$  Hz, 2H), 7.09 (d,  $J = 7.6$  Hz, 2H), 6.41 – 6.39 (m, 2H), 6.32 (d,  $J = 6.1$  Hz, 1H), 6.02 (d,  $J = 6.0$

Hz, 1H), 5.87 (d,  $J = 6.1$  Hz, 1H), 5.73 (d,  $J = 2.3$  Hz, 1H), 4.74 (d,  $J = 14.3$  Hz, 1H), 4.04 (d,  $J = 14.3$  Hz, 1H), 2.57 (qq,  $J = 6.9, 6.9$  Hz, 1H), 2.23 (s, 3H), 1.07 (d,  $J = 6.8$  Hz, 6H);  $^{13}\text{C NMR}$  (176 MHz,  $\text{CDCl}_3$ )  $\delta$  131.8, 130.9, 129.4, 129.3, 129.2, 129.1, 128.7, 112.8, 103.3, 102.8, 101.3, 91.4, 89.7, 89.5, 86.9, 85.9, 81.3, 79.8, 51.4, 31.6, 23.3, 22.8, 18.8; **HRMS** calculated for  $\text{C}_{29}\text{H}_{33}\text{NO}_2\text{RuS}^+$   $[\text{M}+\text{H}]^+$  546.1035, found 546.1039.

## 7. Crystal structure of 3aa

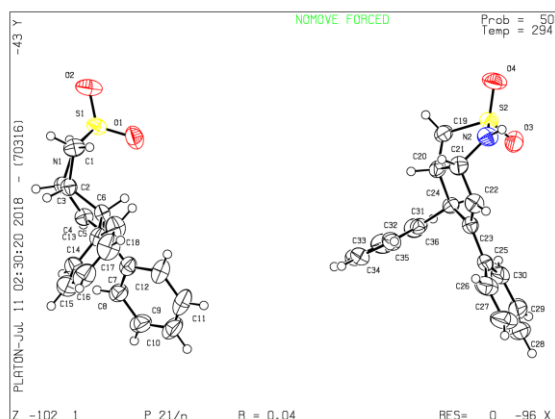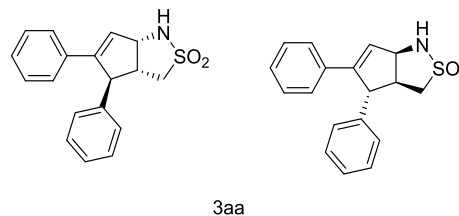

CCDC1854428

## 8. References

1. H. Yan, H. Wang, X. Li, X. Xin, C. Wang and B. Wan, *Angew. Chem. Int. Ed.* **2015**, *54*, 10613.
2. A. Padwa, A. C. Flick, C. A. Leverett and T. Stengel, *J. Org. Chem.* **2004**, *69*, 6377.

### 9. Copy of NMR Spectra

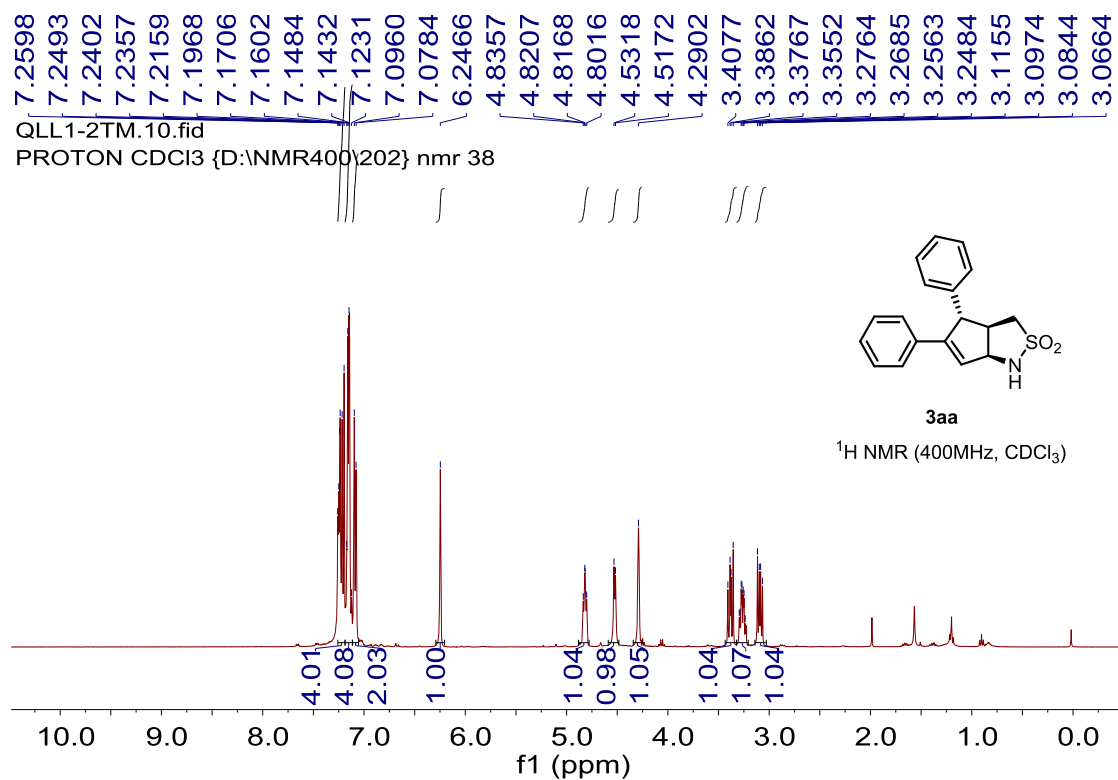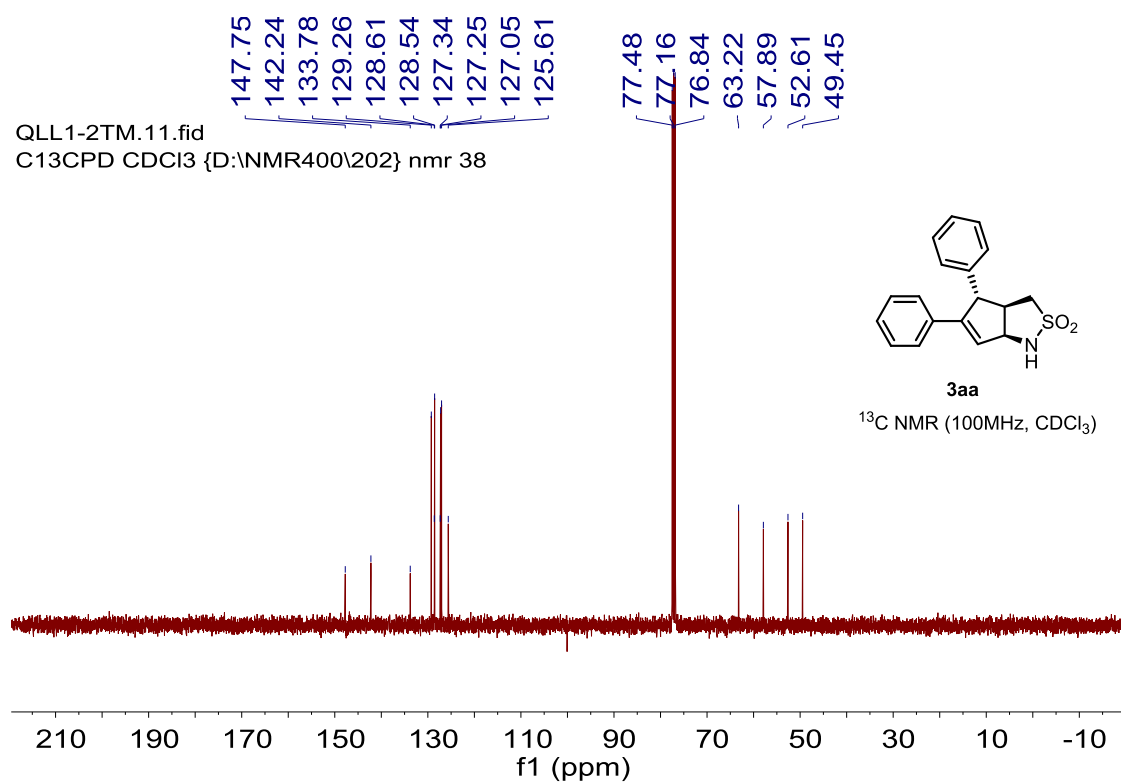

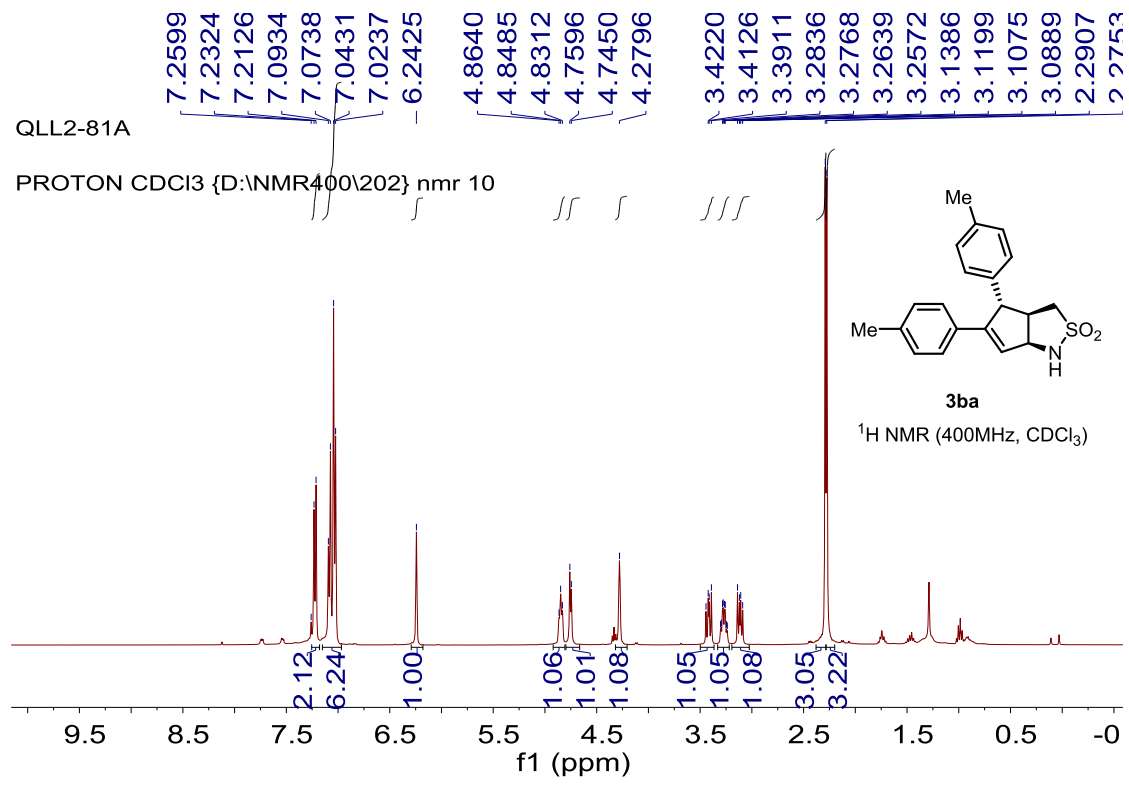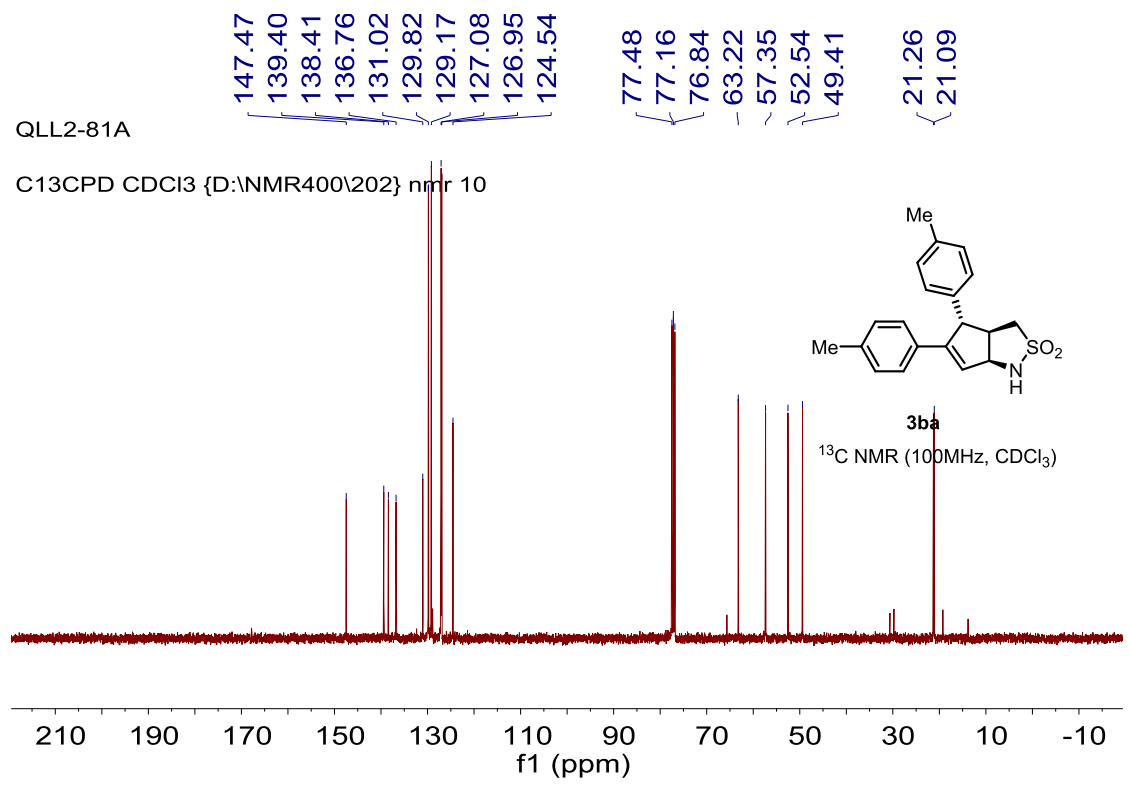

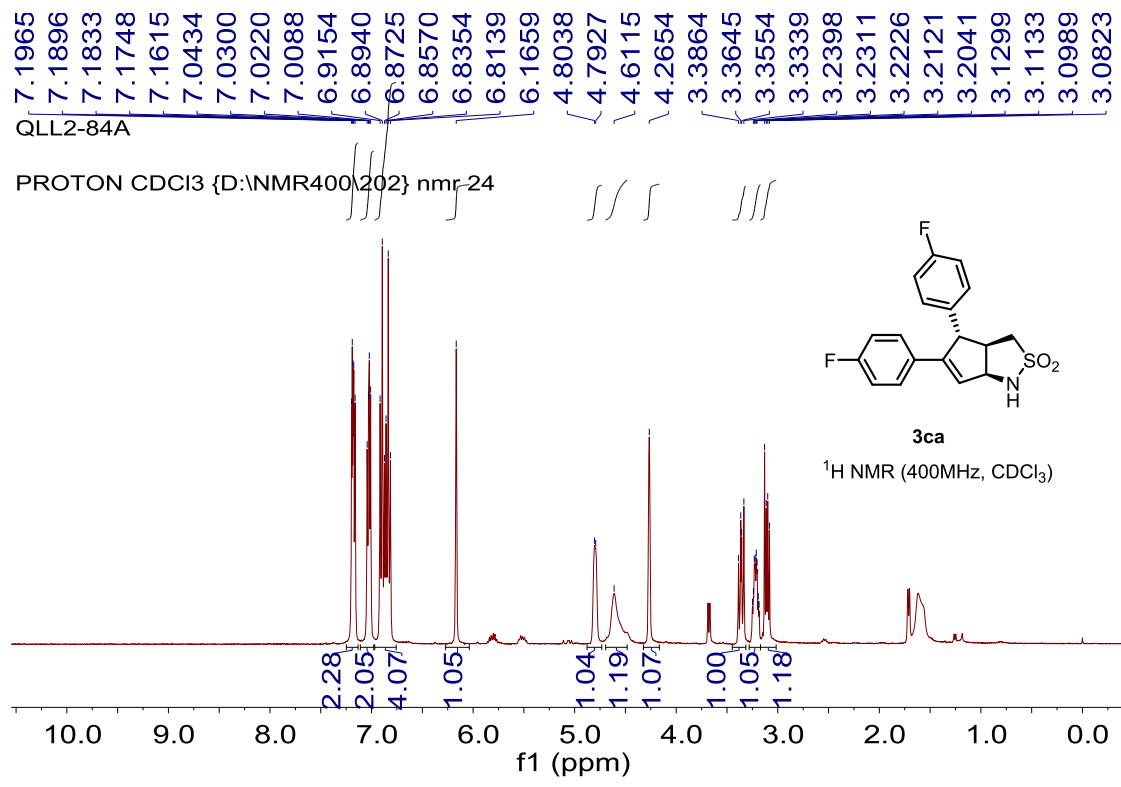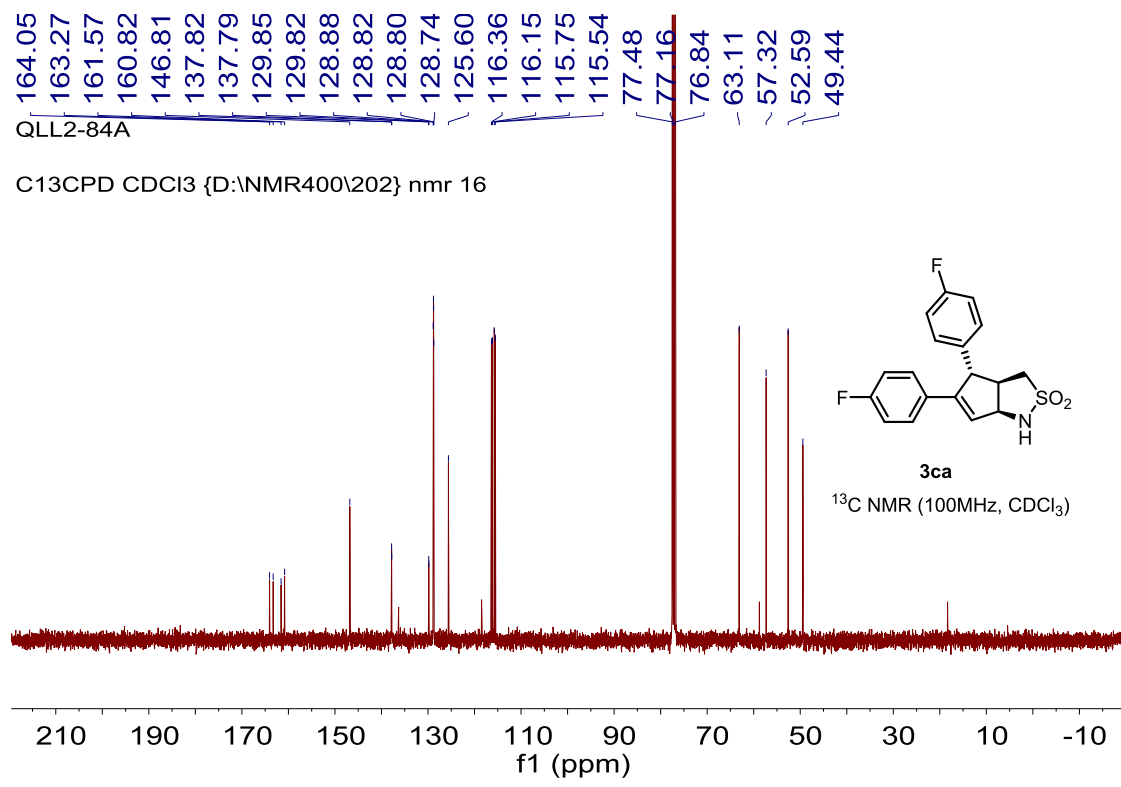

QLL2-84A

F19CPD CDCI3 {D:\NMR400\202} nmr 9

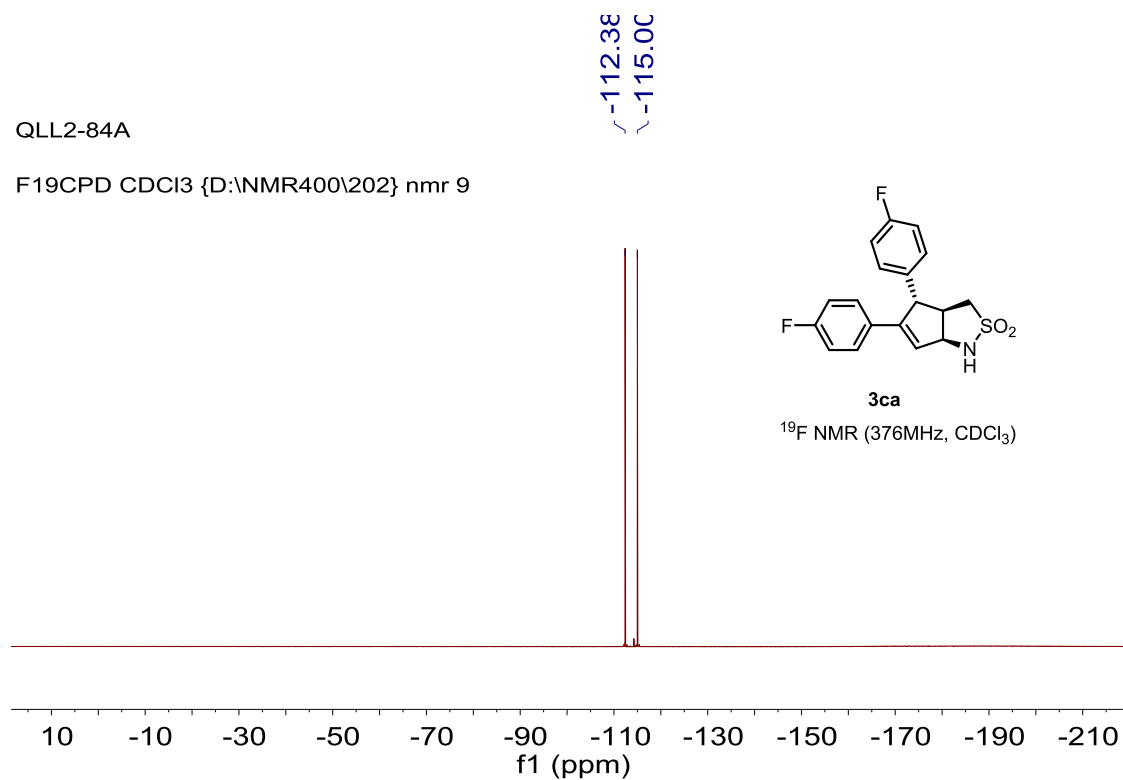

QLL2-73A

PROTON CDCI3 {D:\NMR400\202} nmr 34

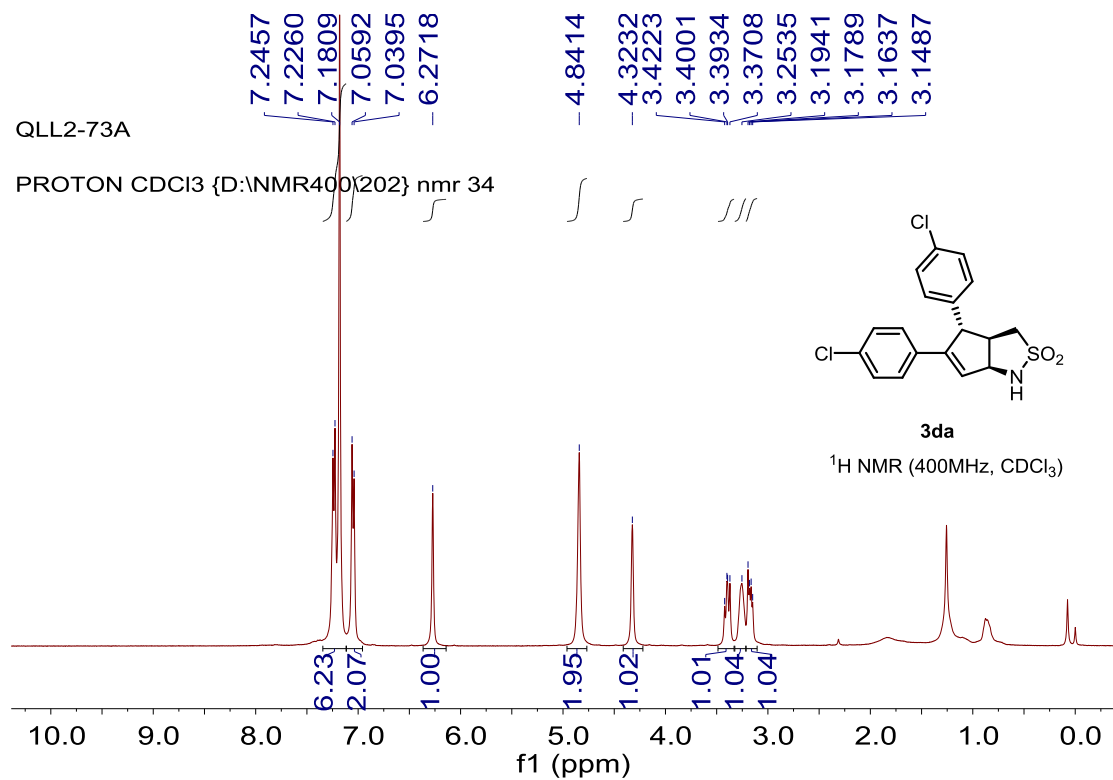

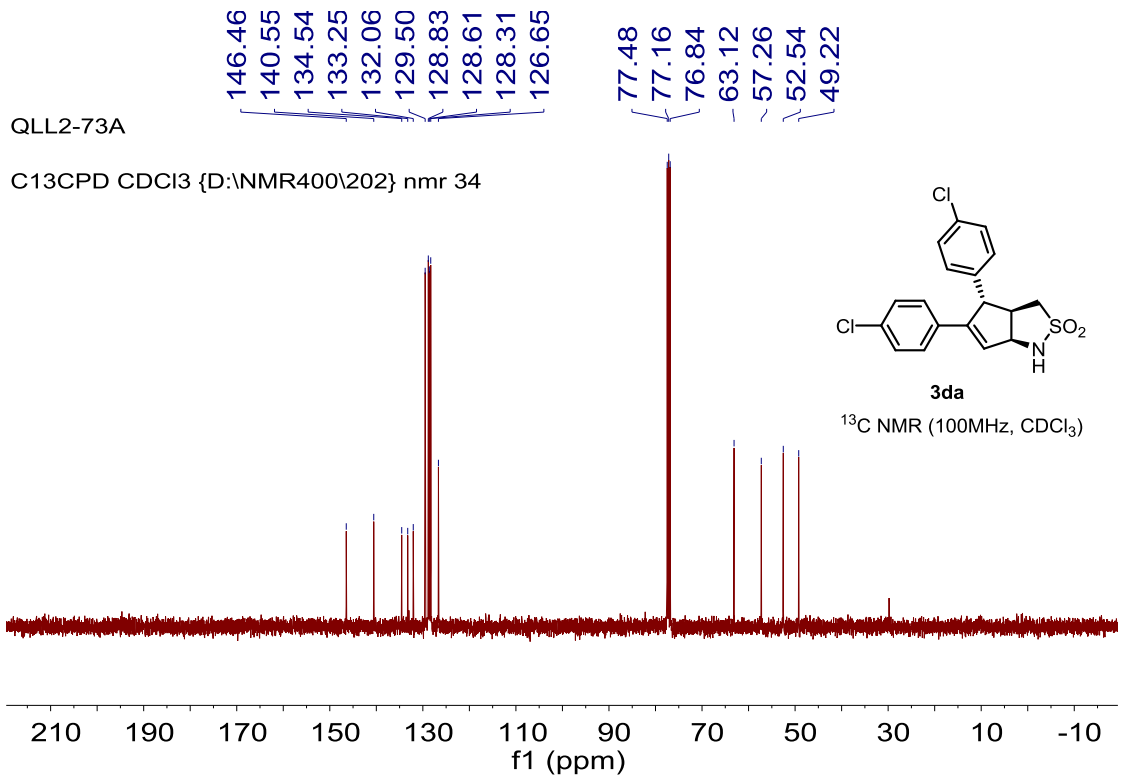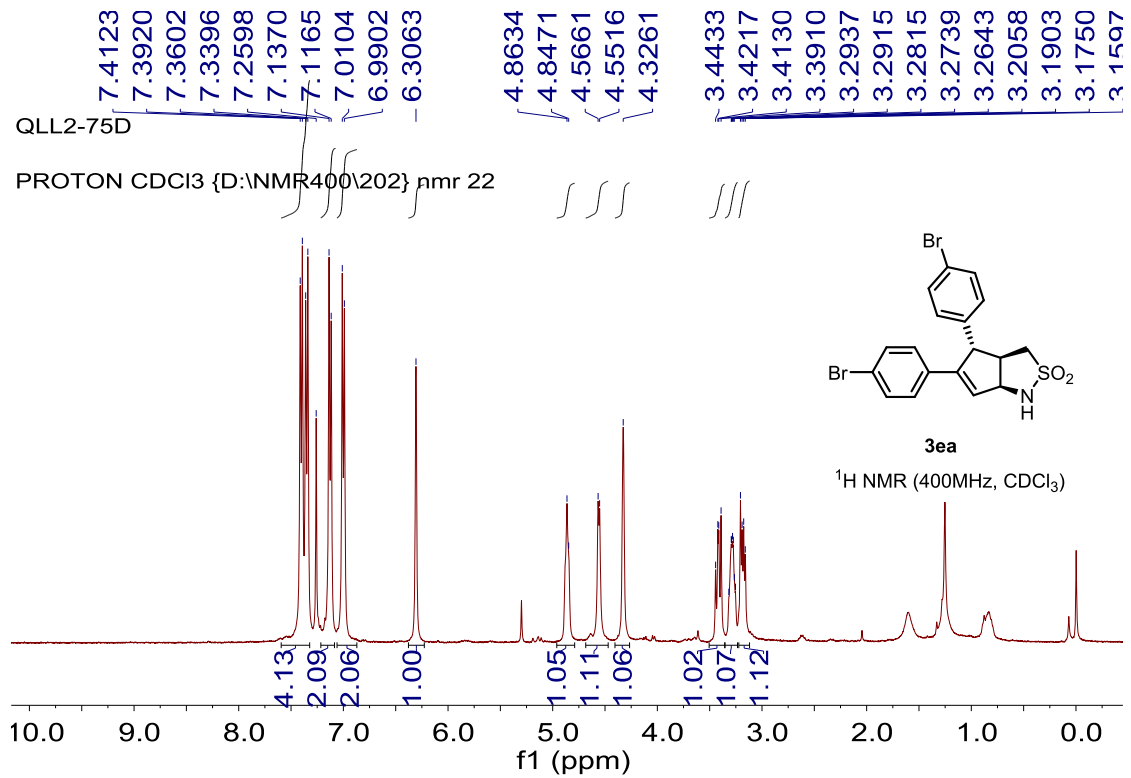

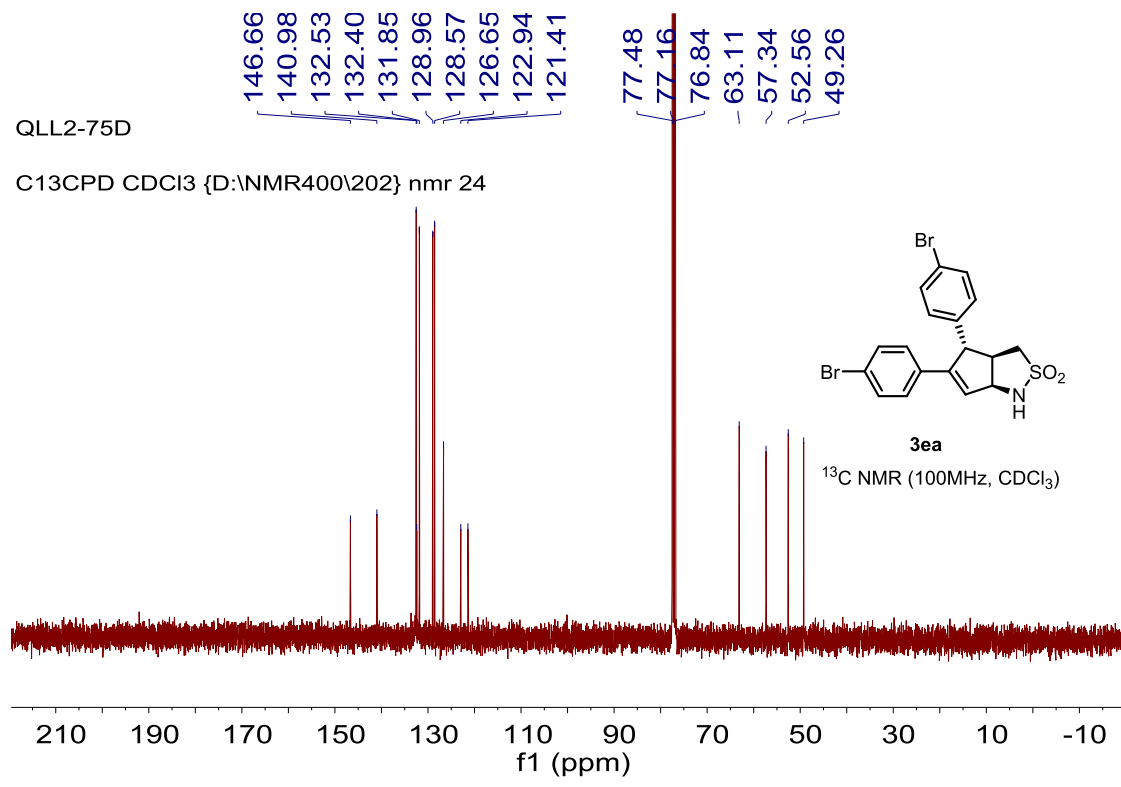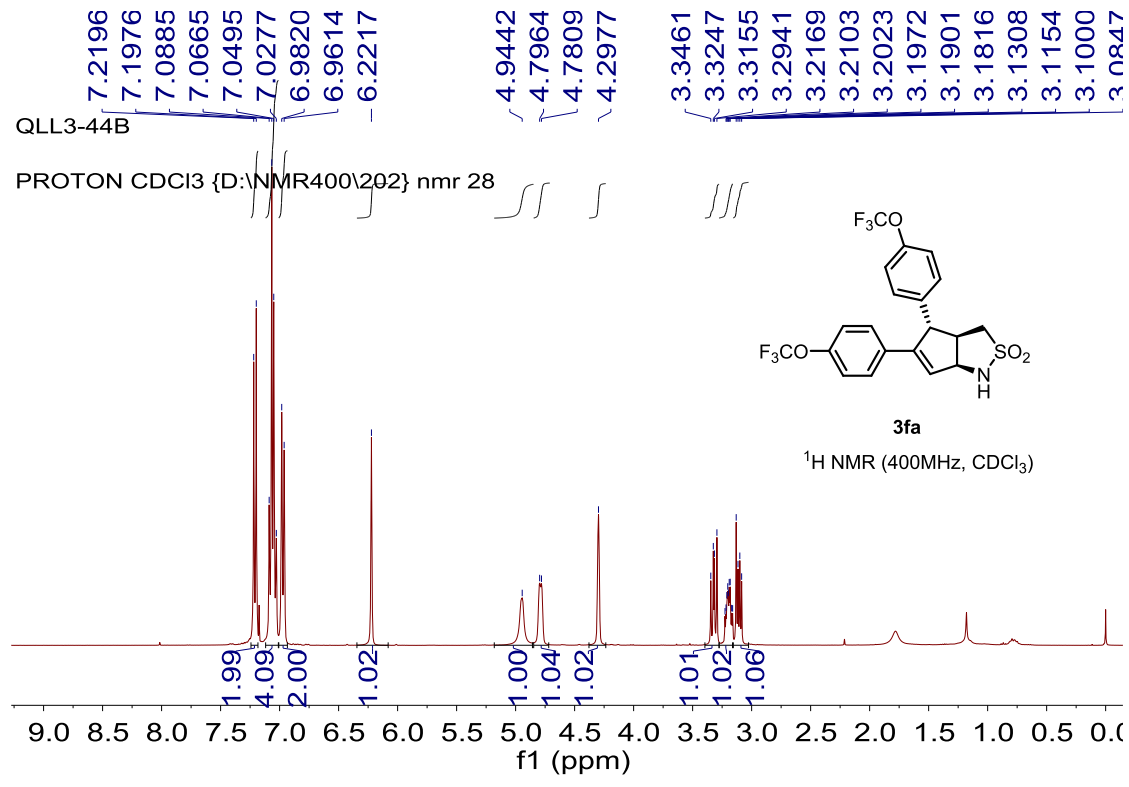



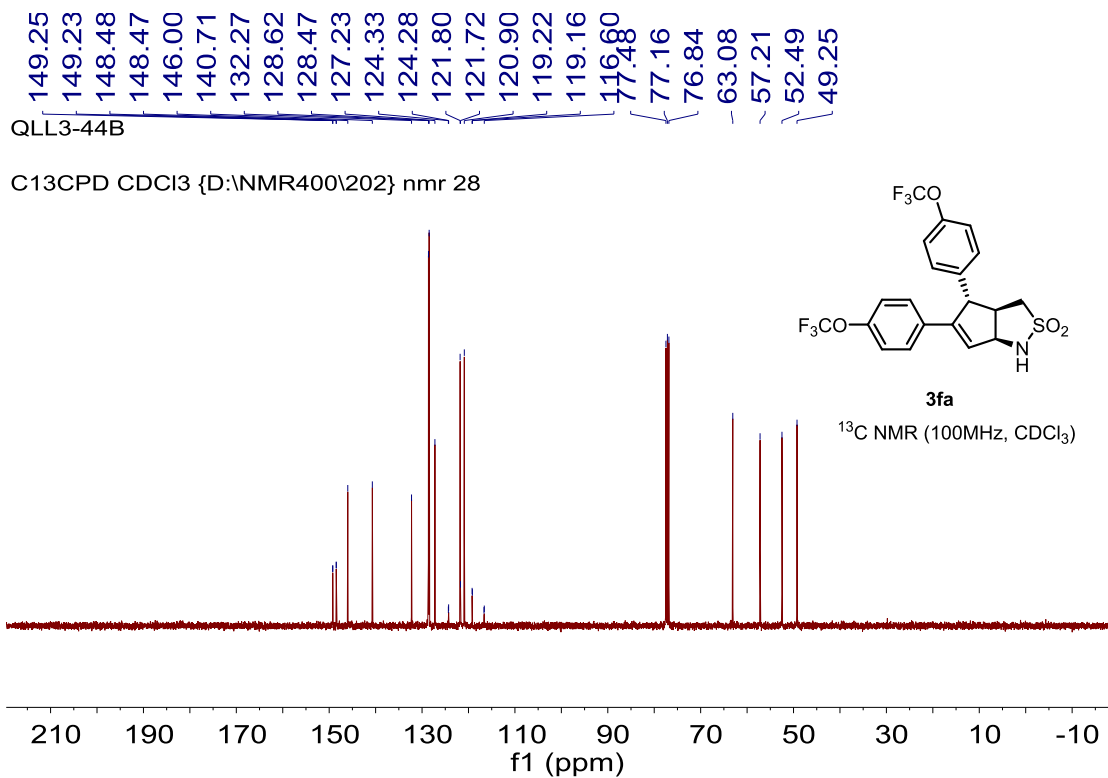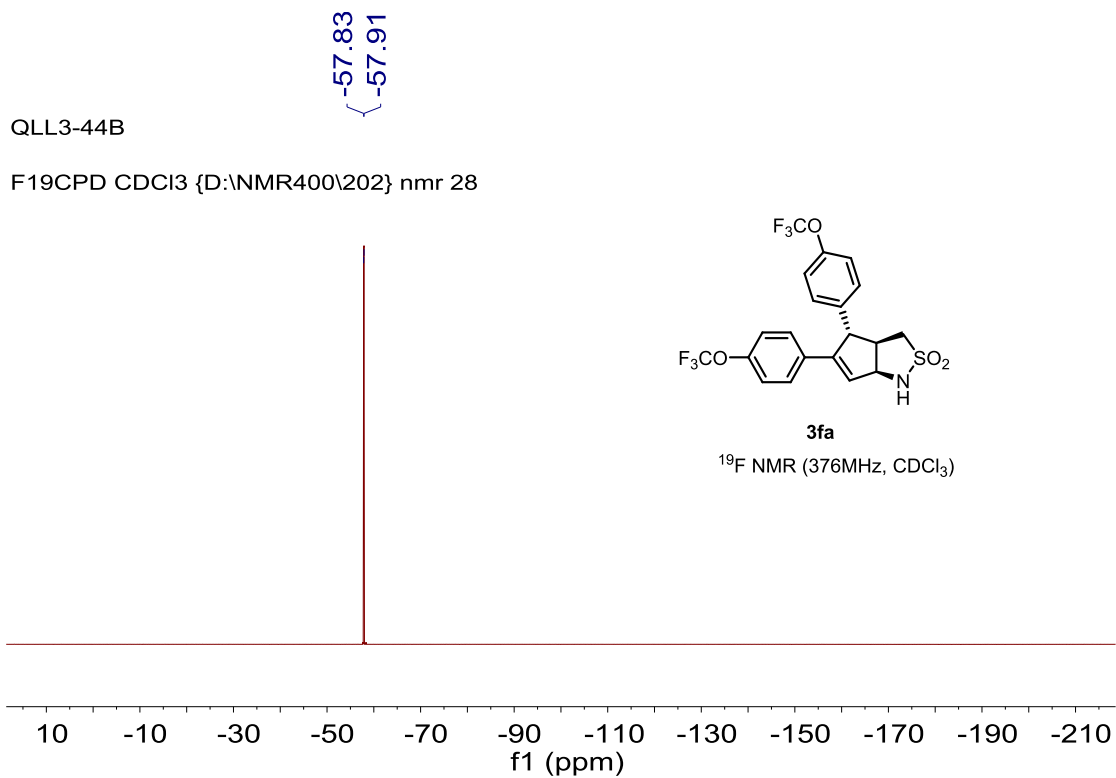

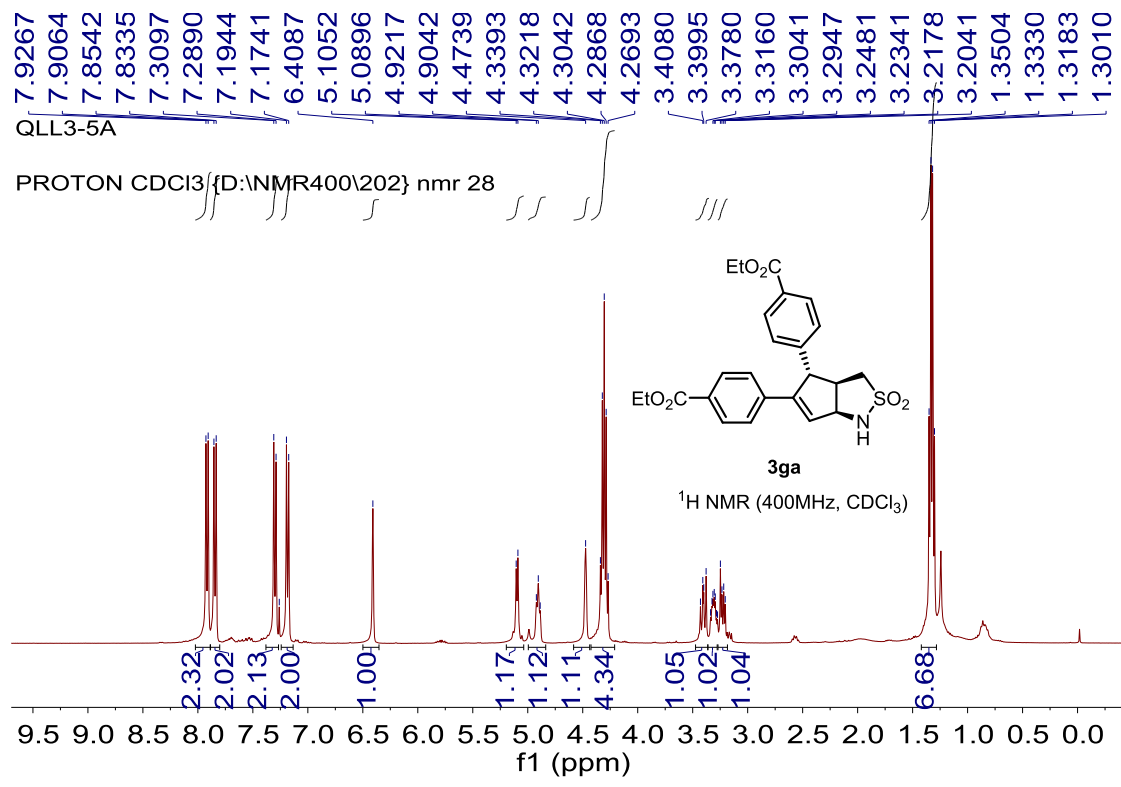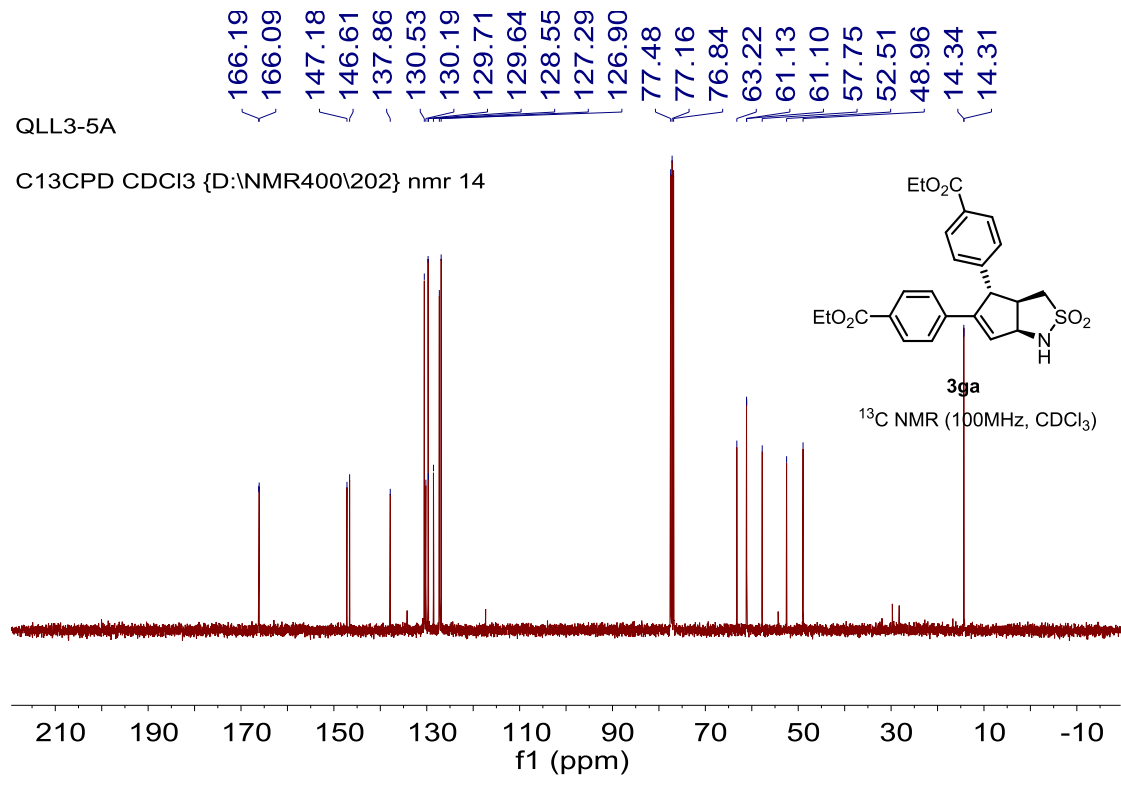

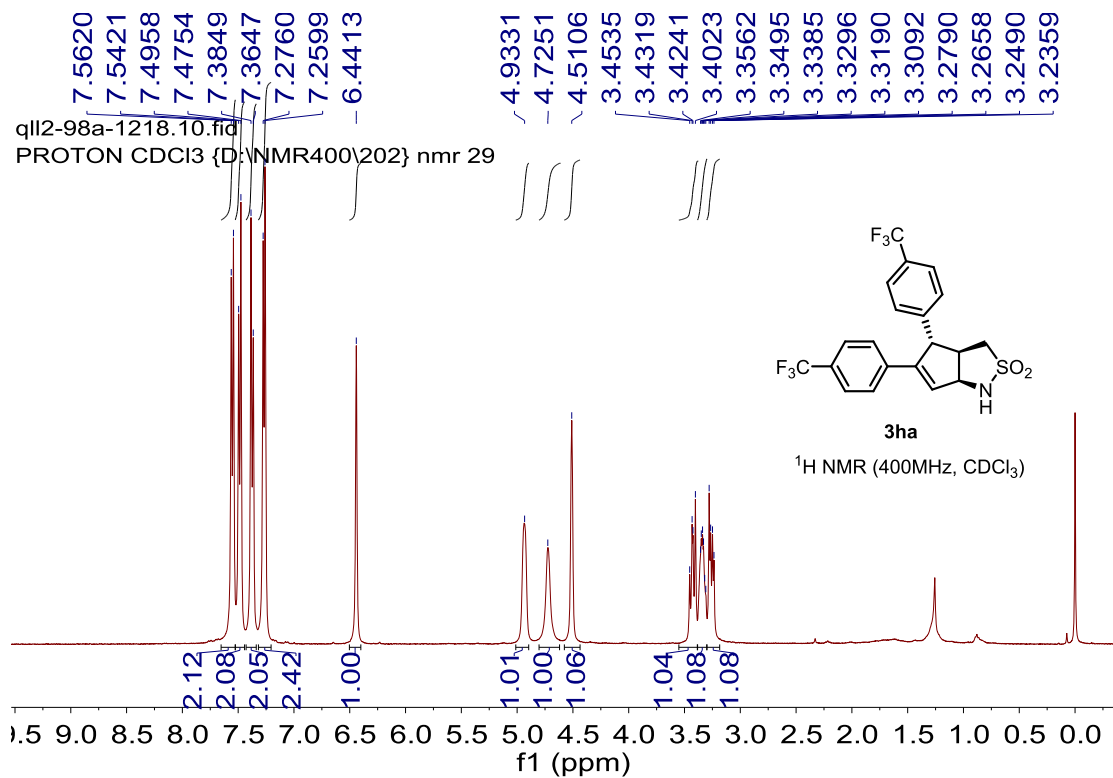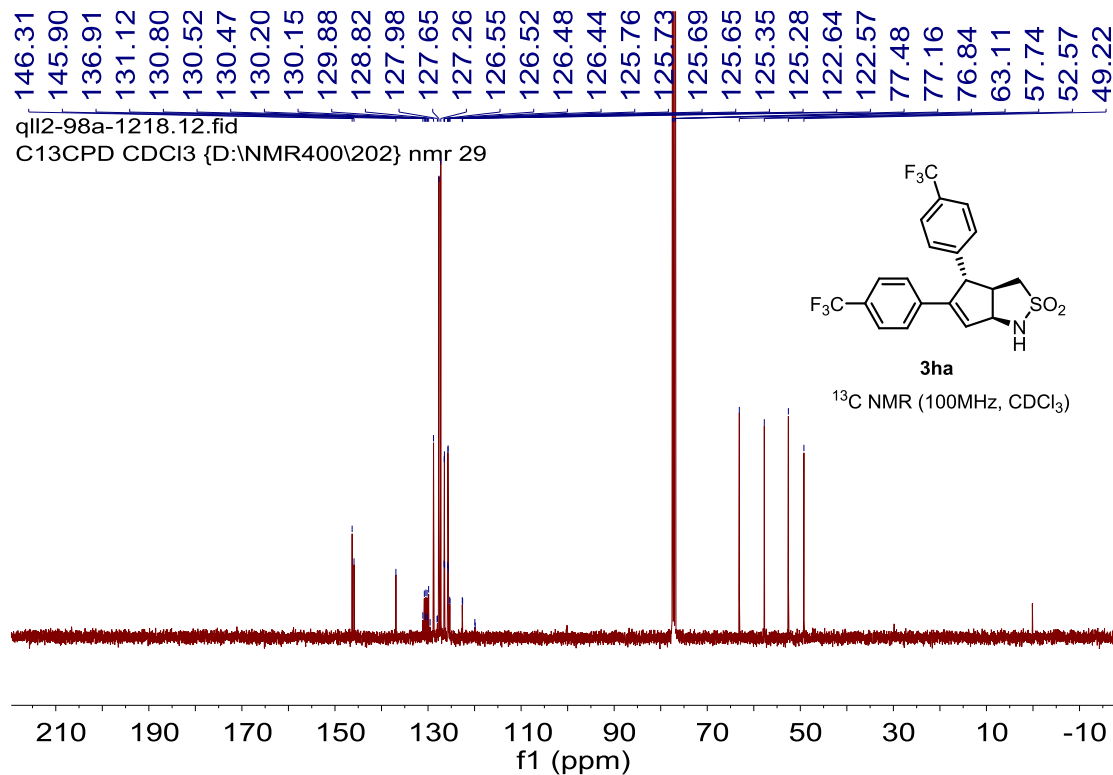

qll2-98a-1218.11.fid  
F19CPD CDCl3 {D:\NMR400\202} nmr 29

-62.61  
-62.83

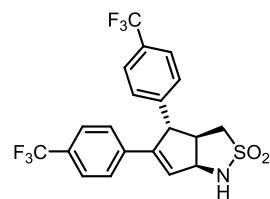

**3ha**

<sup>19</sup>F NMR (376MHz, CDCl<sub>3</sub>)

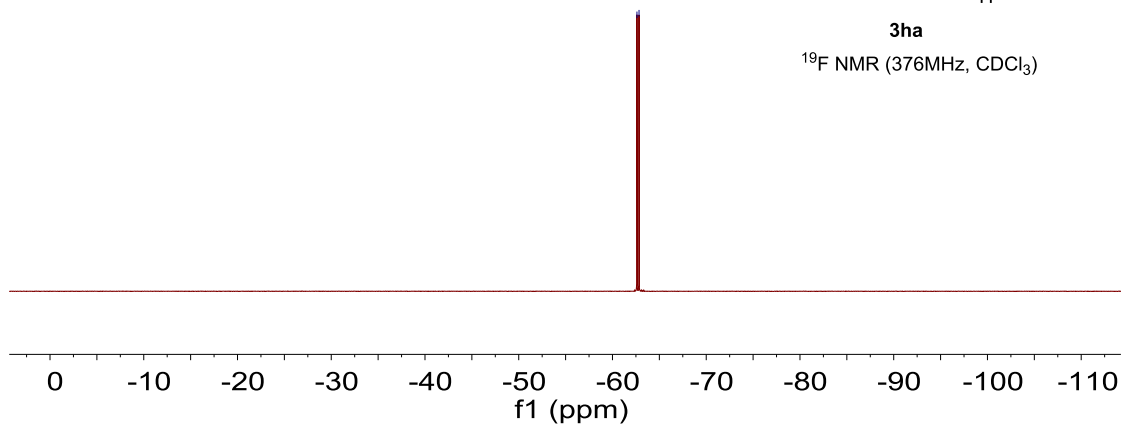

7.6841  
7.6628  
7.6302  
7.6182  
7.6085  
7.5801  
7.5617  
7.5185  
7.4952  
7.4112  
7.3968  
7.3785  
7.3600  
7.3424  
7.3239  
7.3049  
7.1754  
7.1543  
6.3703  
4.9685  
4.9567  
4.8560  
4.8406  
4.5146  
3.3623  
3.3550  
3.3326  
3.2831  
3.2640  
3.1727  
3.1567  
3.1428  
3.1267

QLL3-21A

PROTON CDCl3 {D:\NMR400\202} nmr 23

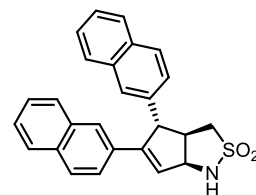

**3ia**

<sup>1</sup>H NMR (400MHz, CDCl<sub>3</sub>)

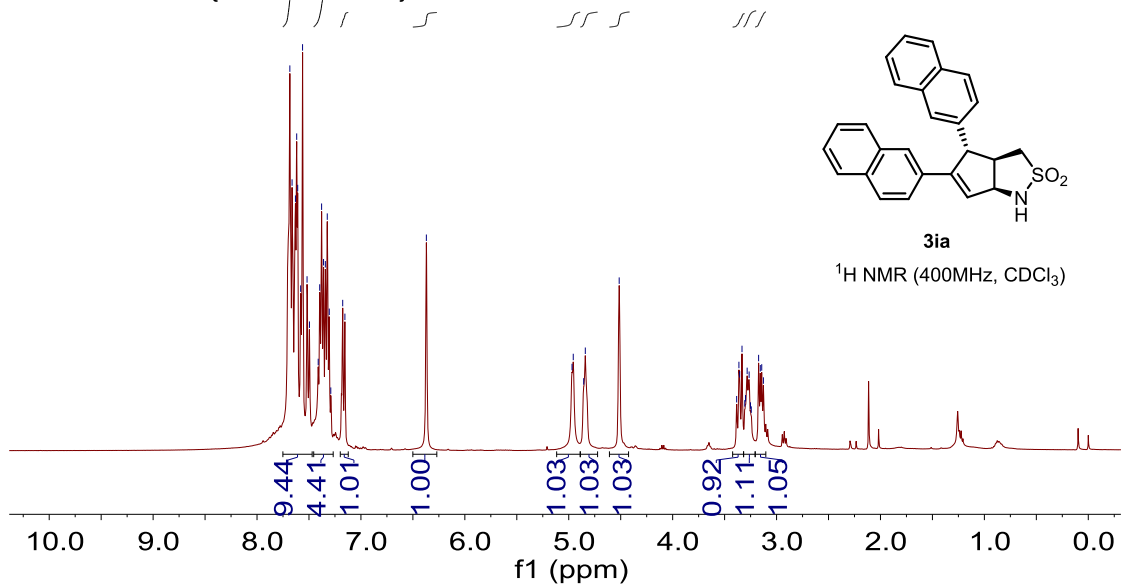

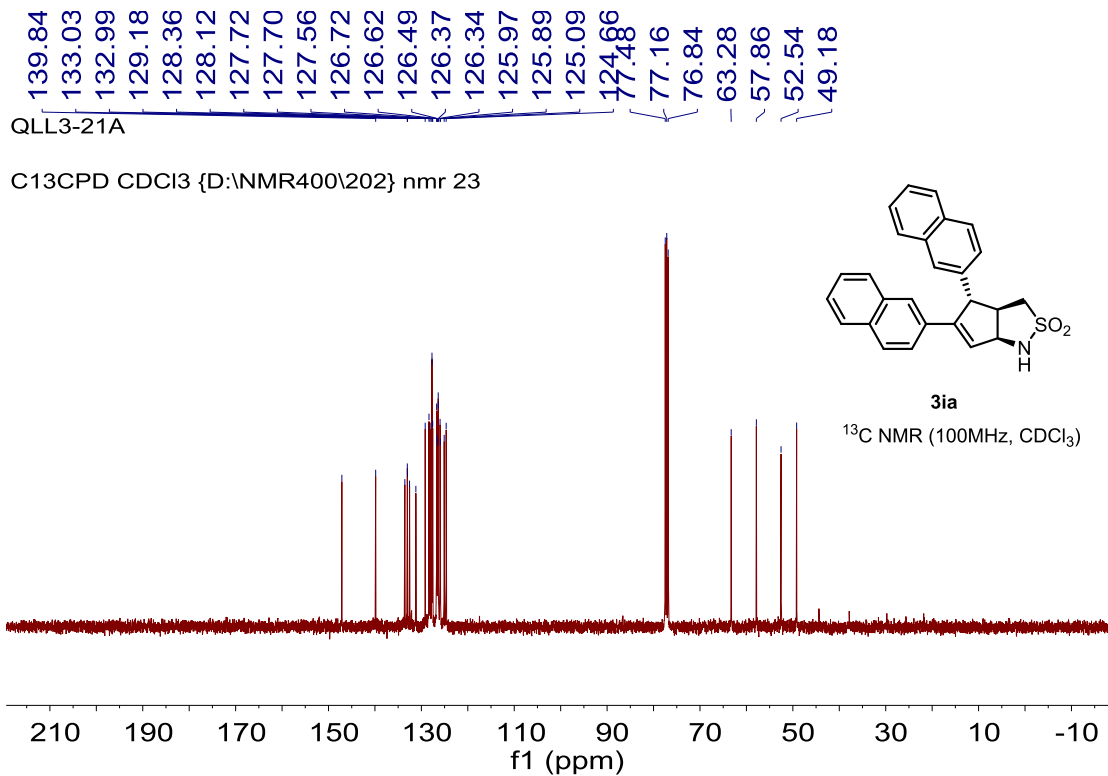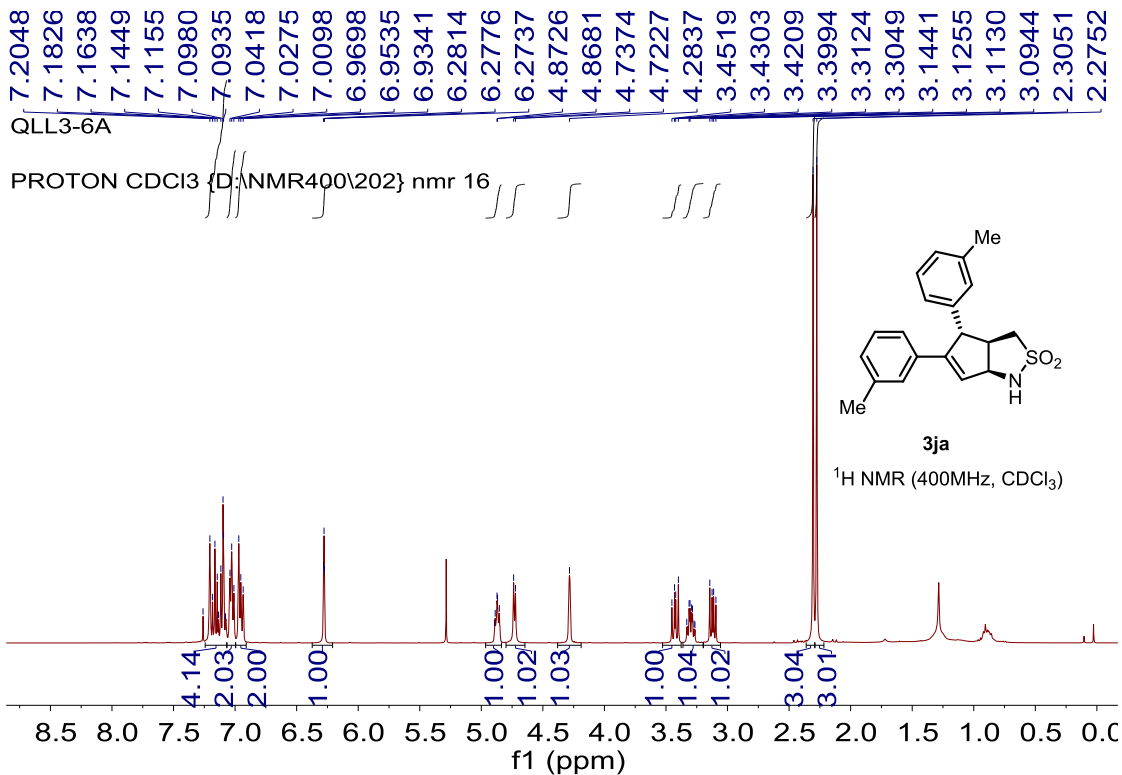

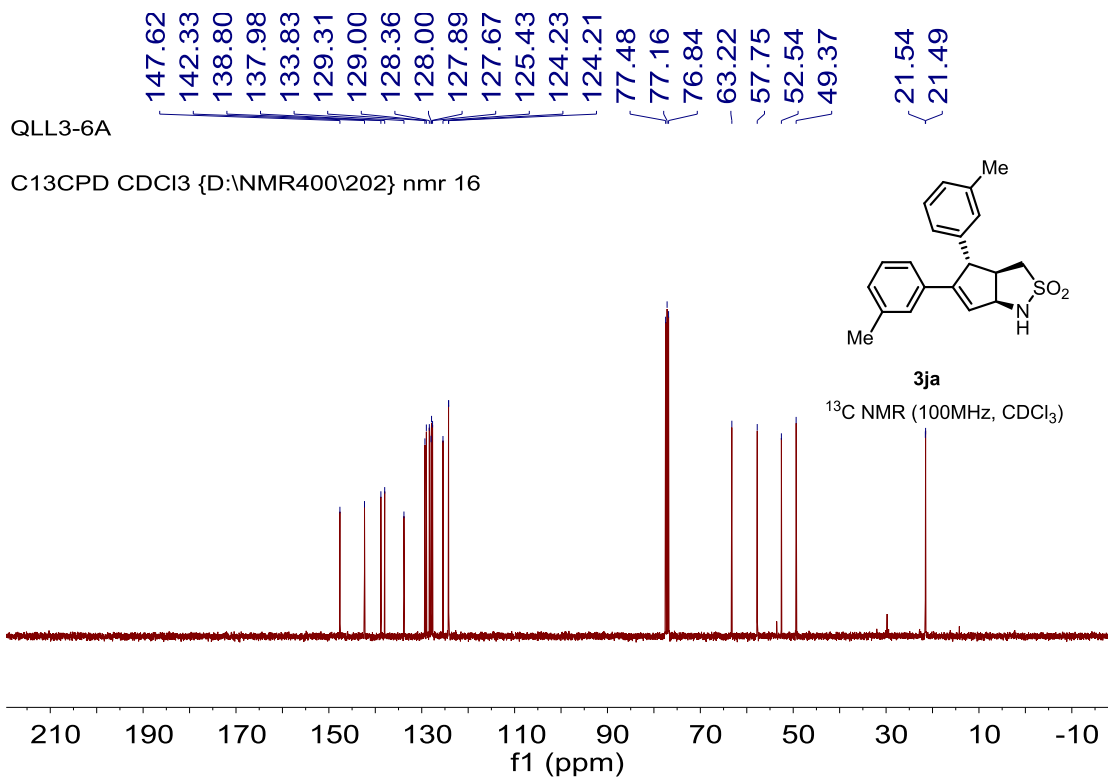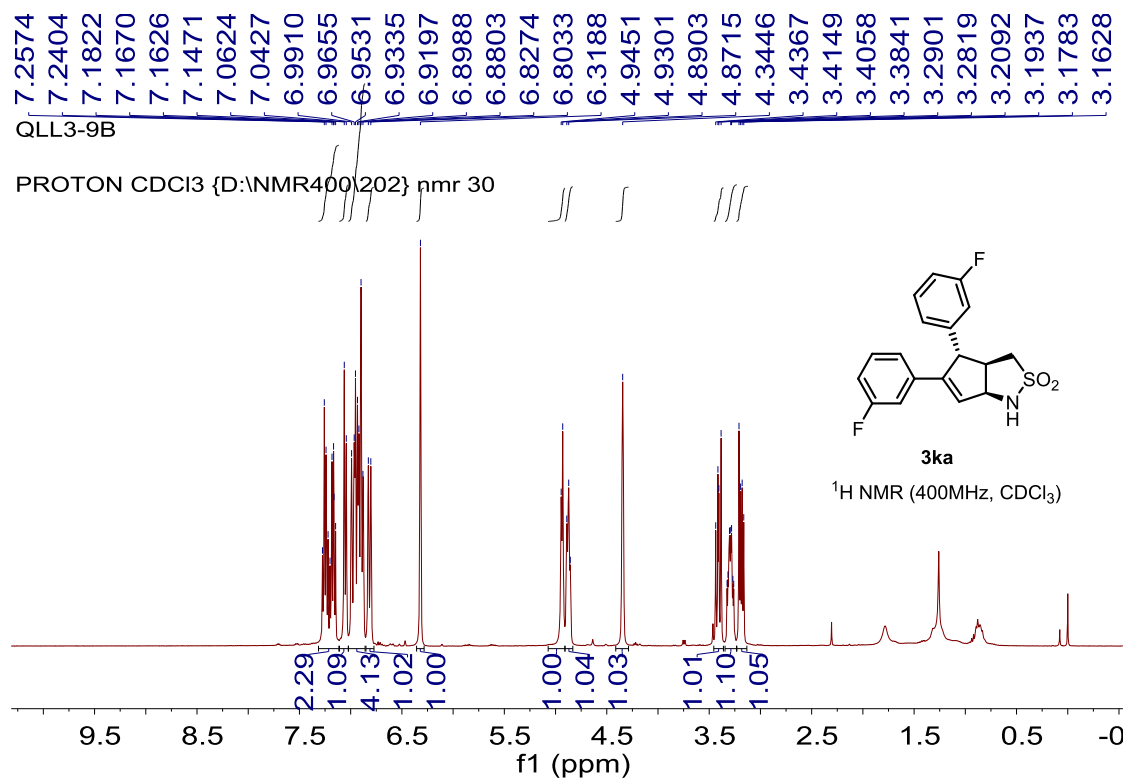

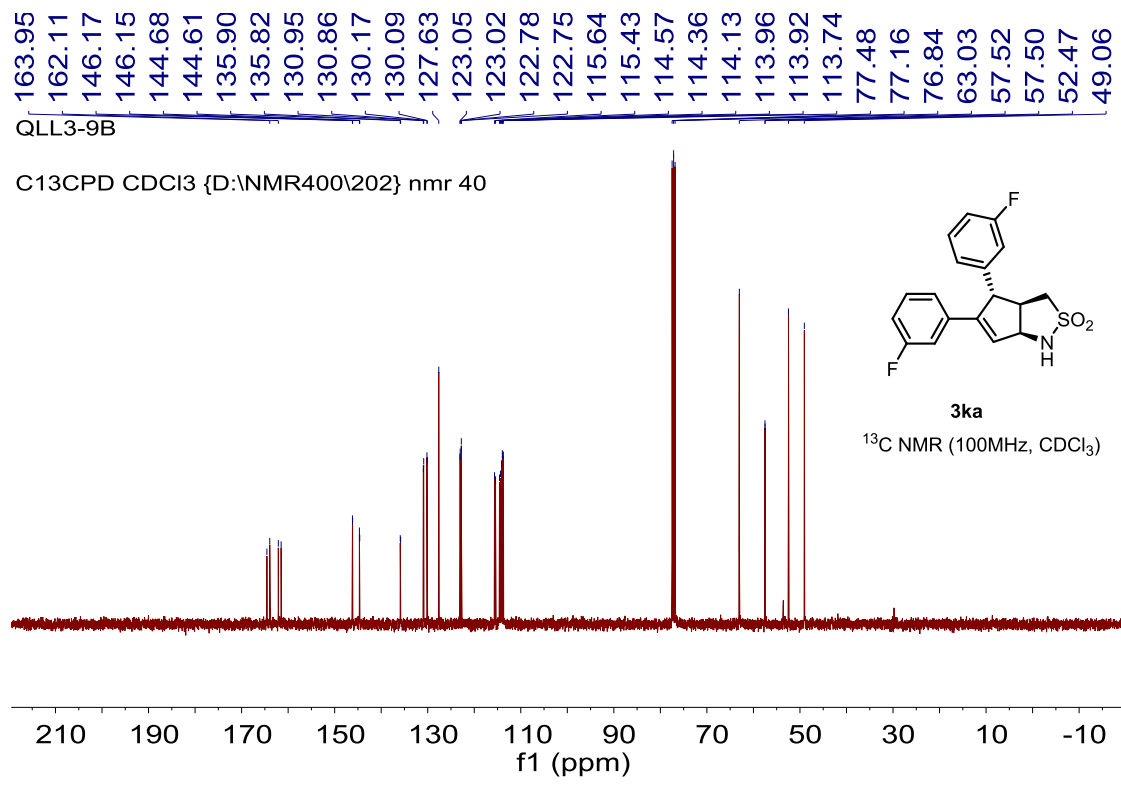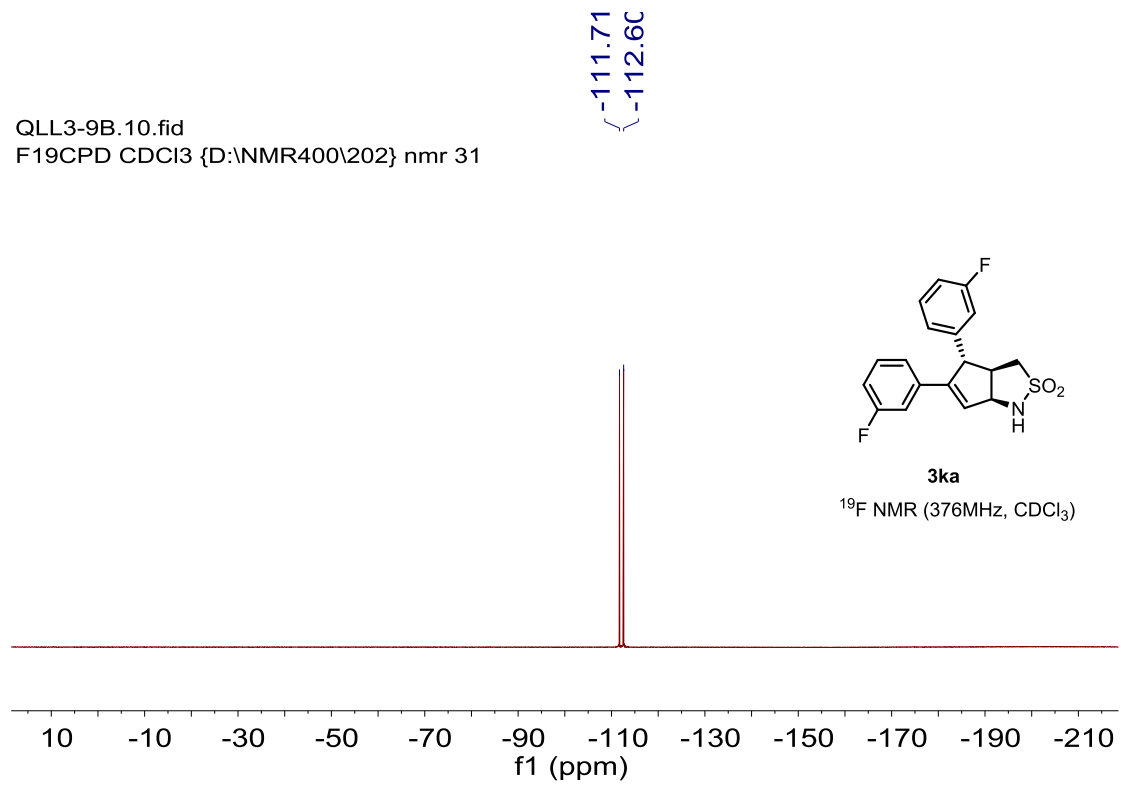

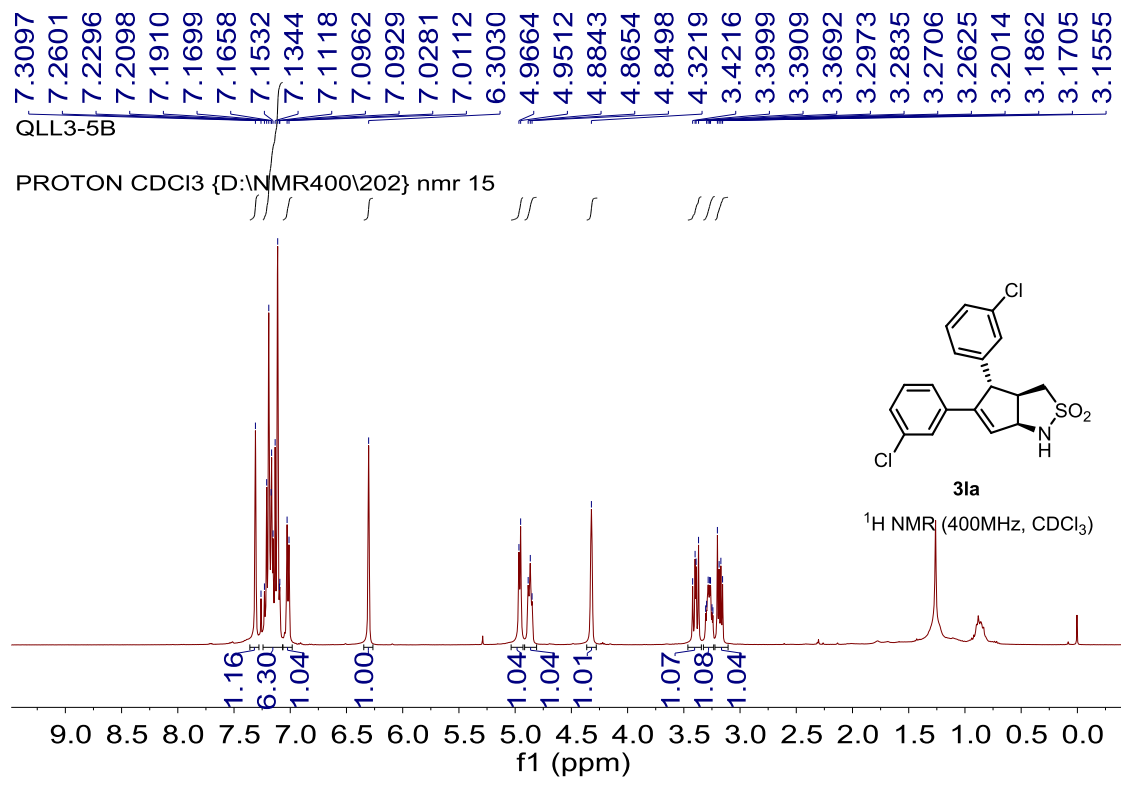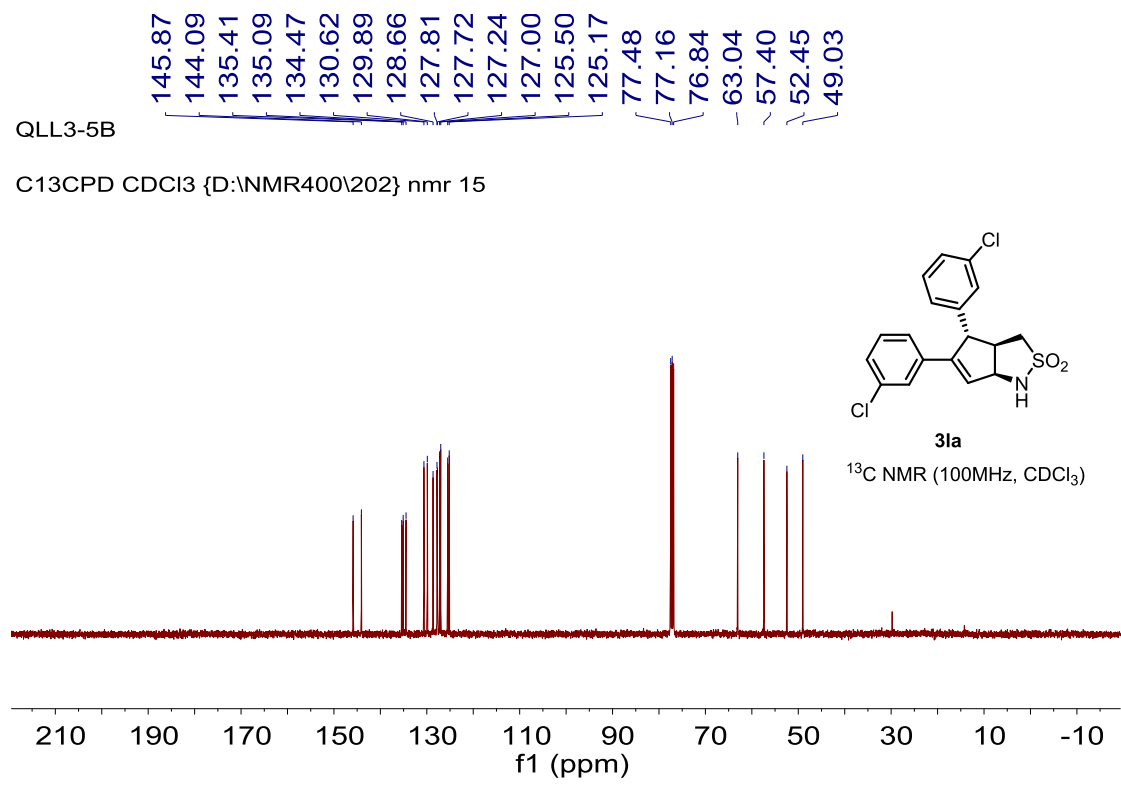



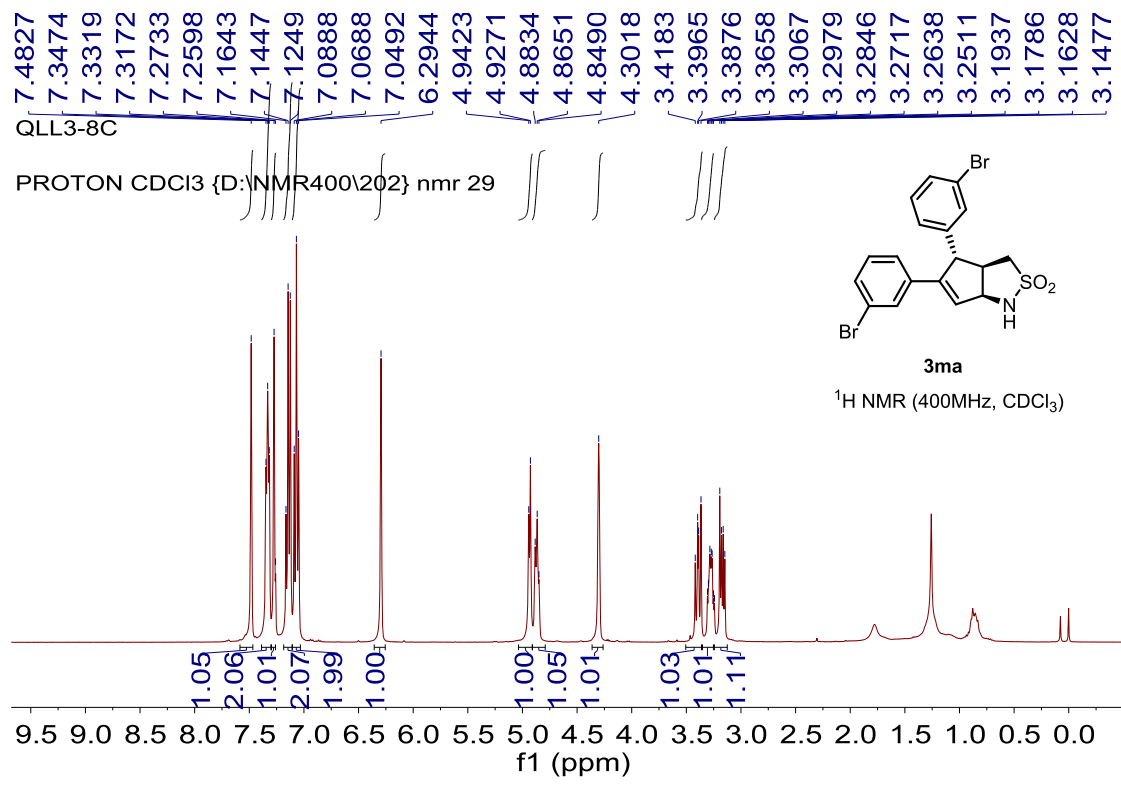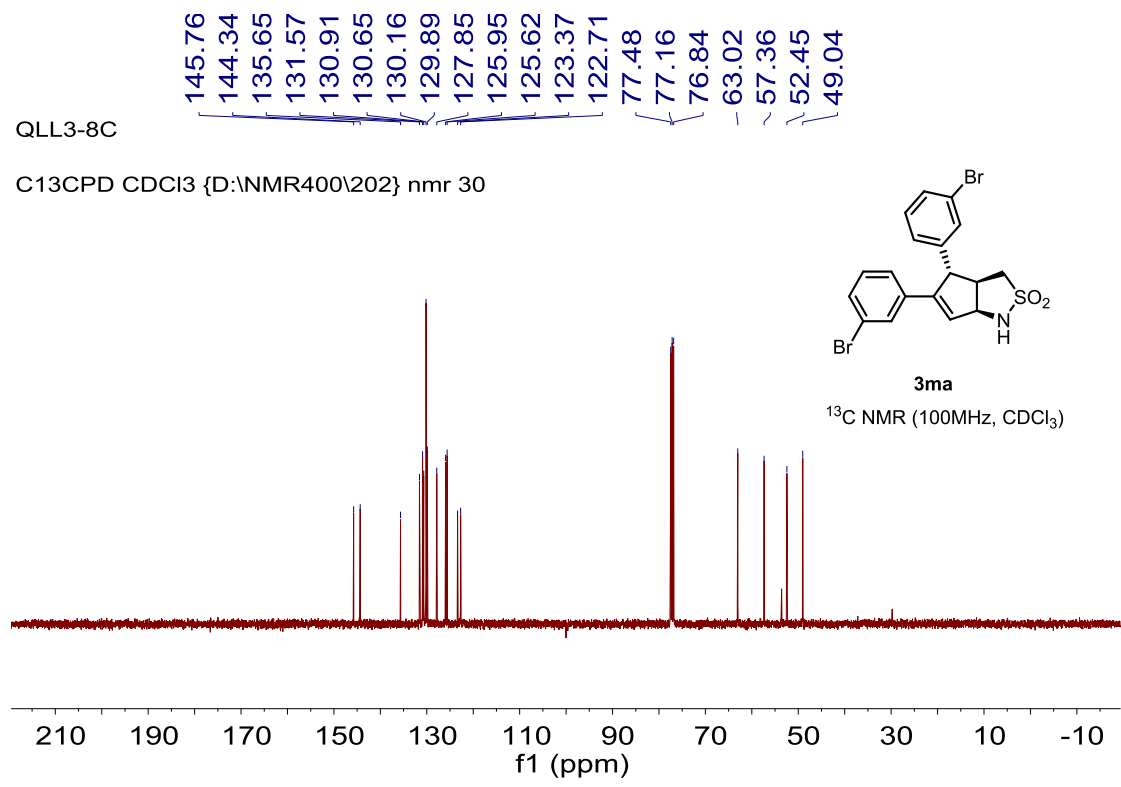

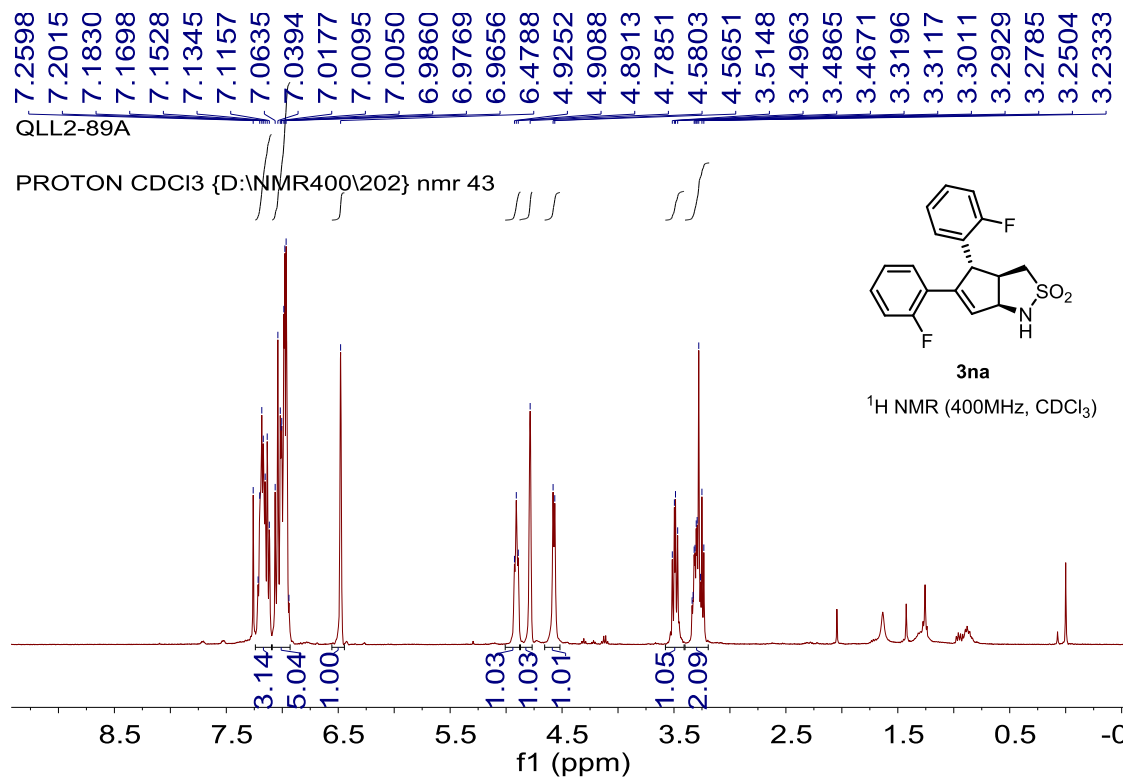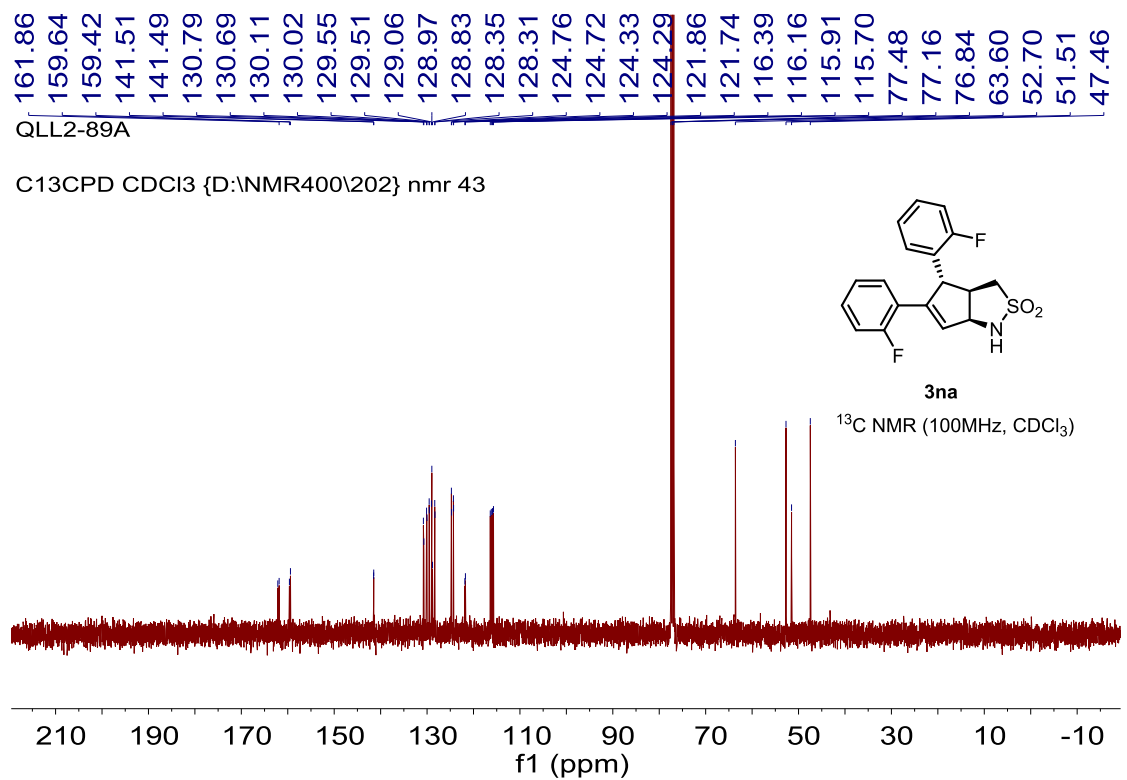

QLL2-89A

F19CPD CDCl3 {D:\NMR400\202} nmr 43

--111.09  
--118.23

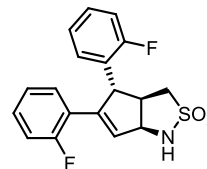

**3na**

<sup>19</sup>F NMR (376MHz, CDCl<sub>3</sub>)

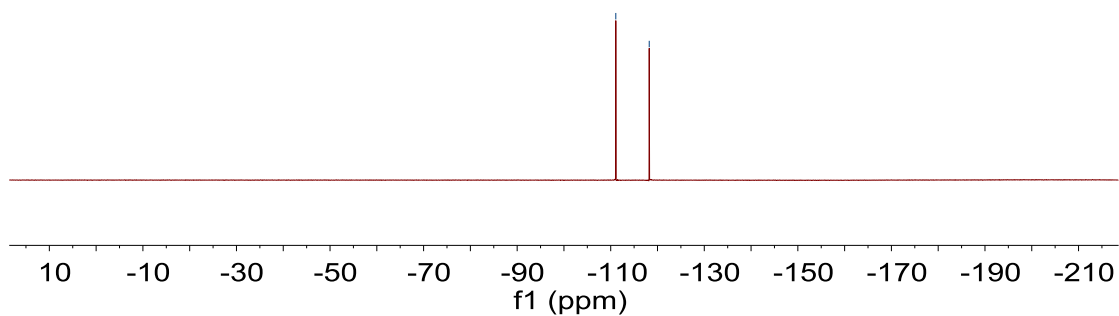

7.2558  
7.2368  
7.2313  
7.1958  
7.1828  
7.0878  
7.0699  
6.3278  
4.7185  
4.7175  
4.1952  
4.1782  
4.0563  
4.0363  
3.2901  
3.2654  
3.2561  
3.2383  
3.2309  
3.1288  
3.1131  
3.1032  
3.0948  
3.0786  
2.4921  
2.4675  
2.4577  
2.4430  
2.4321  
2.2681  
2.2443  
2.2097  
2.1980

QLL5-25D

PROTON CDCl3 {D:\NMR400\202} nmr 52

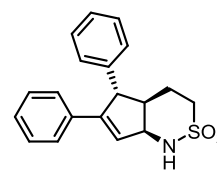

**3ab**

<sup>1</sup>H NMR (400MHz, CDCl<sub>3</sub>)

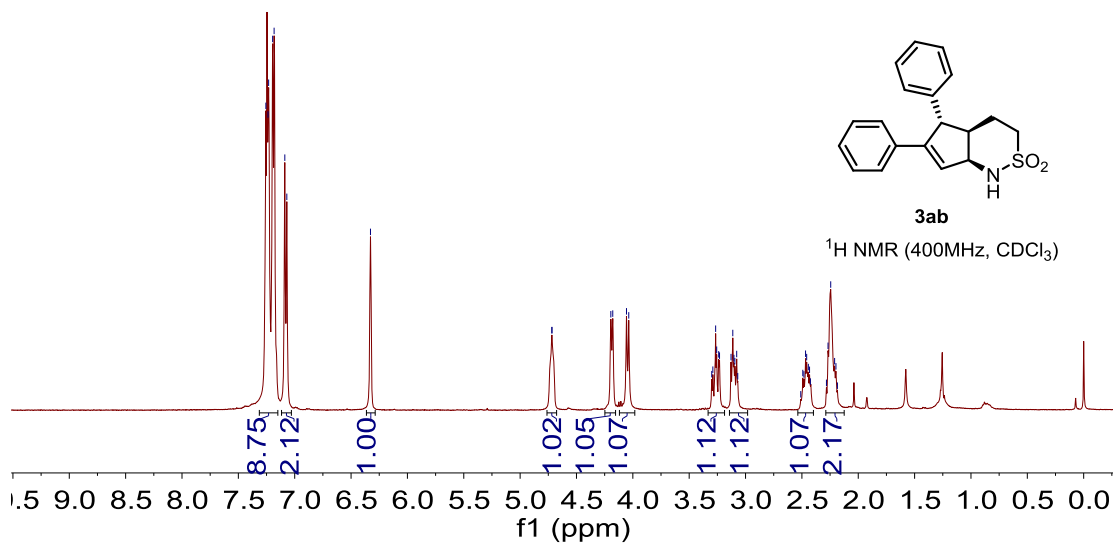

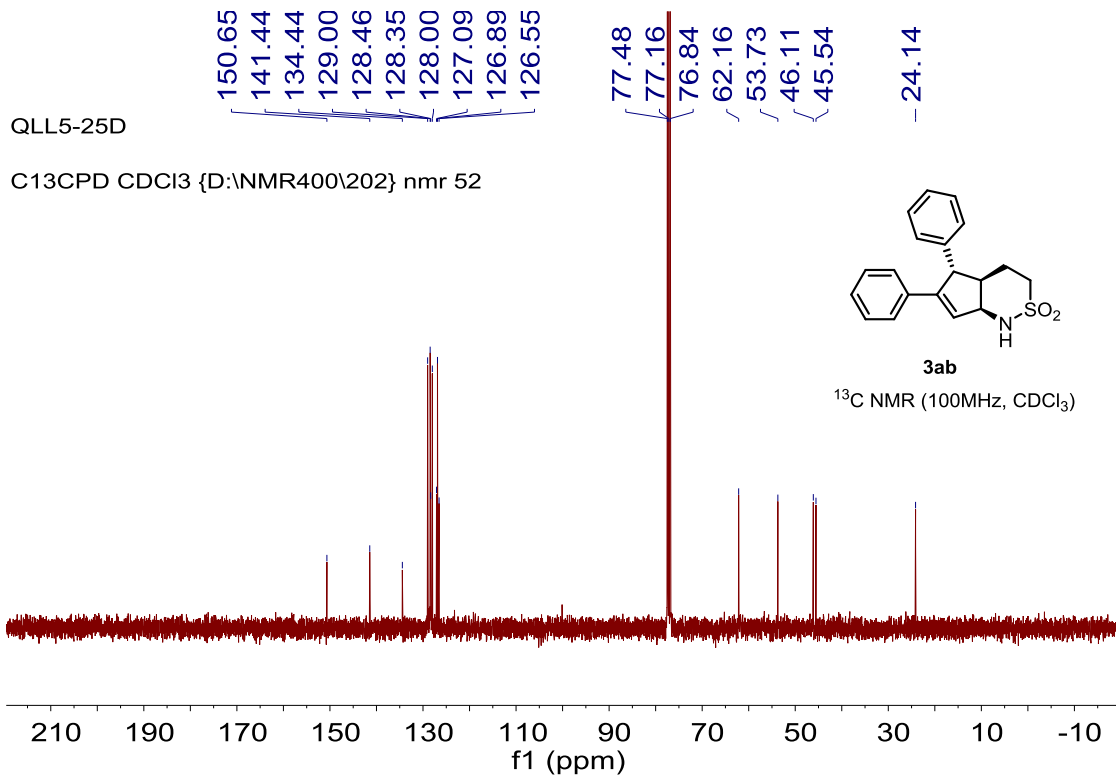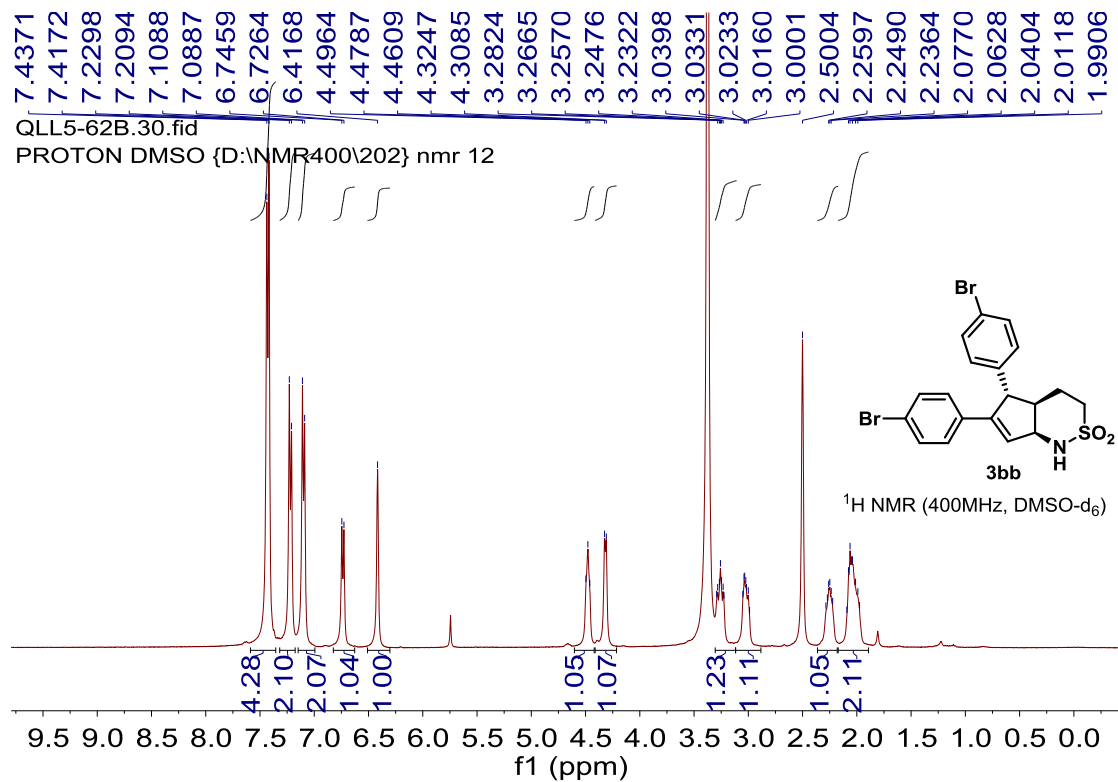

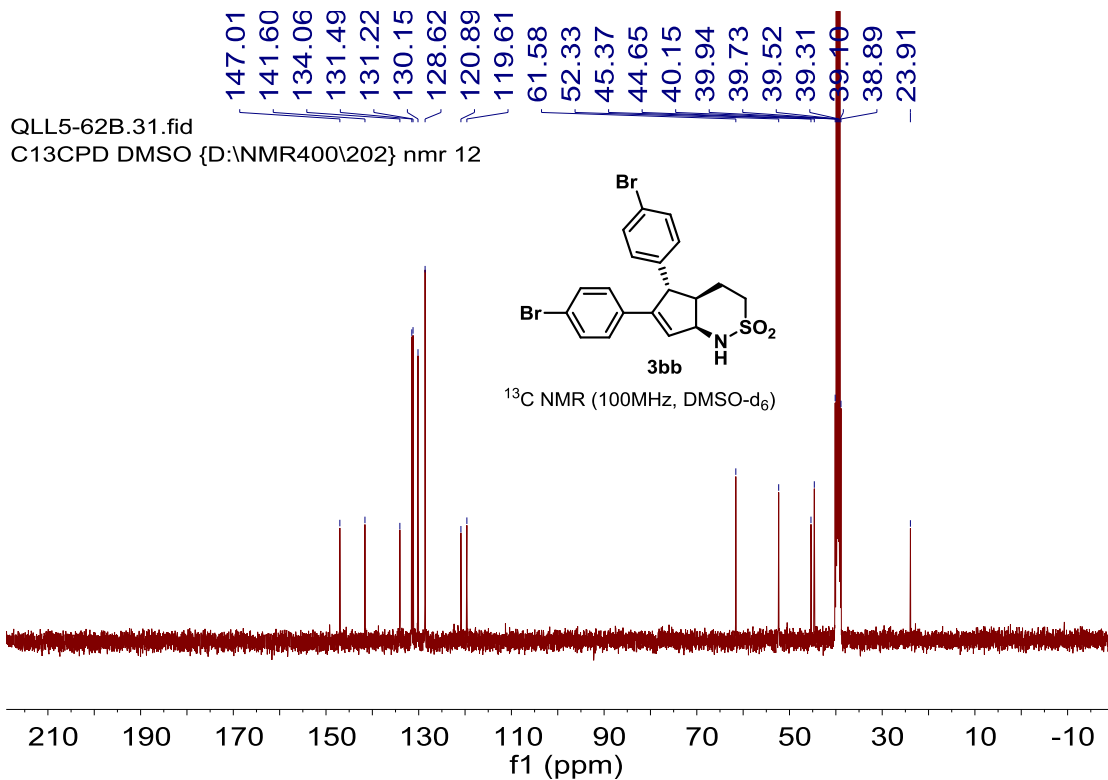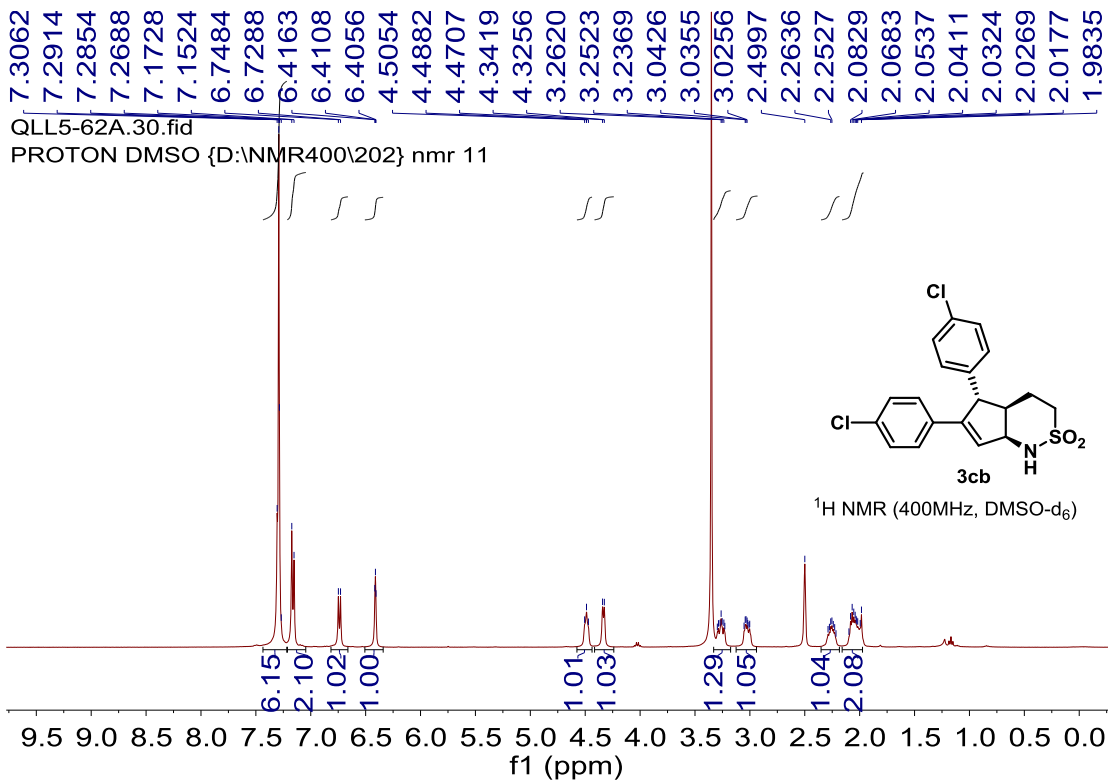

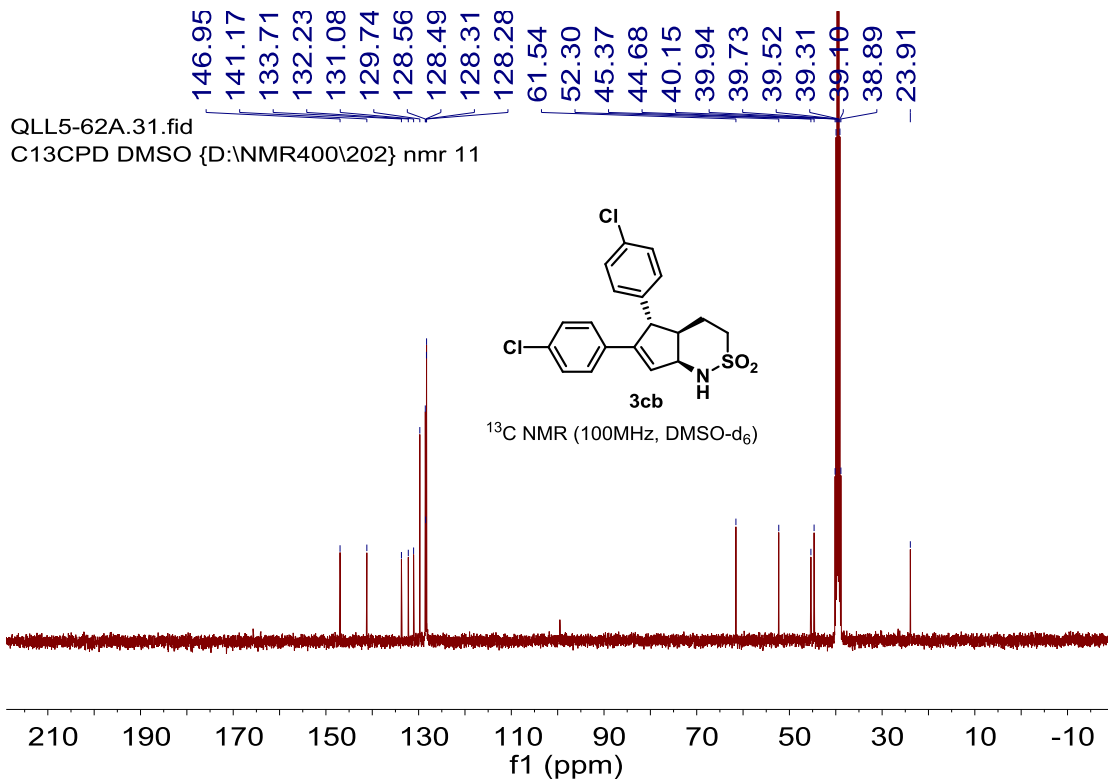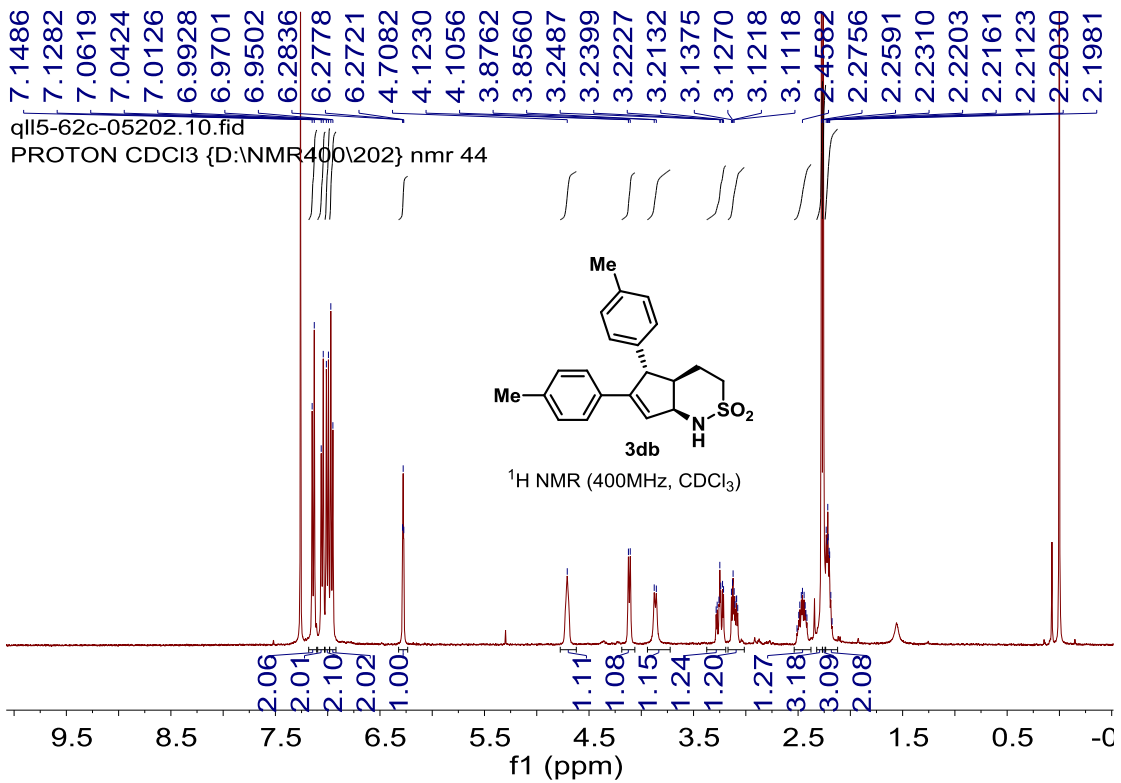

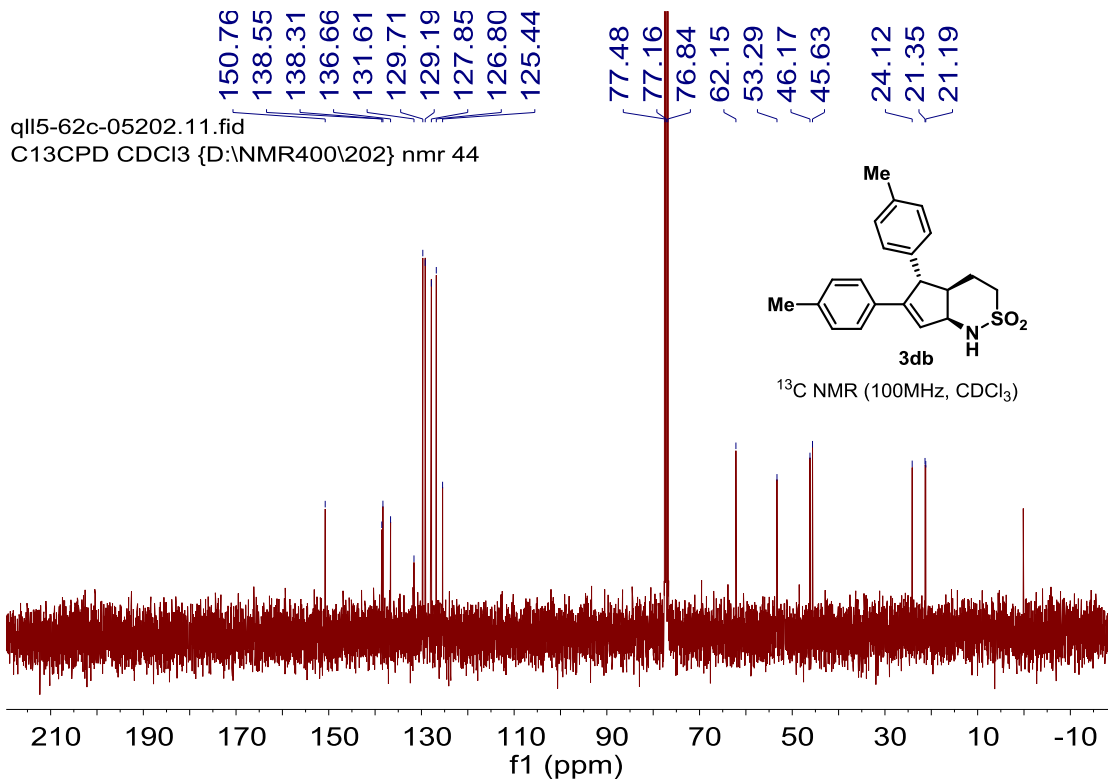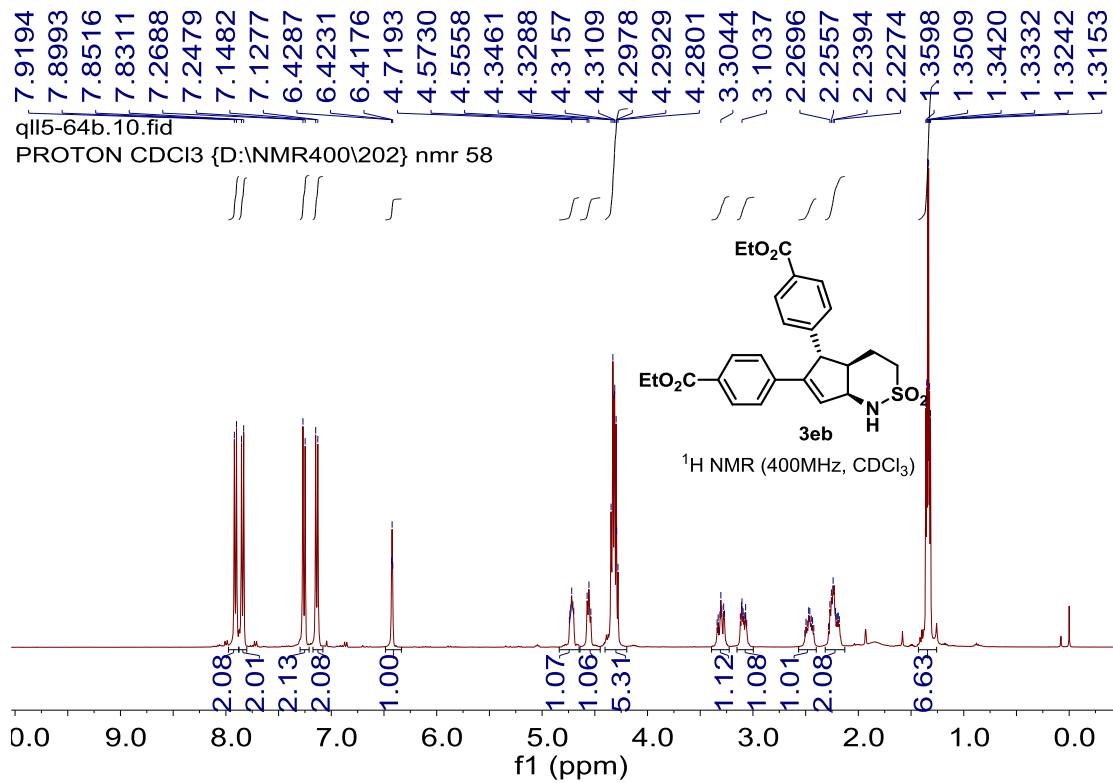

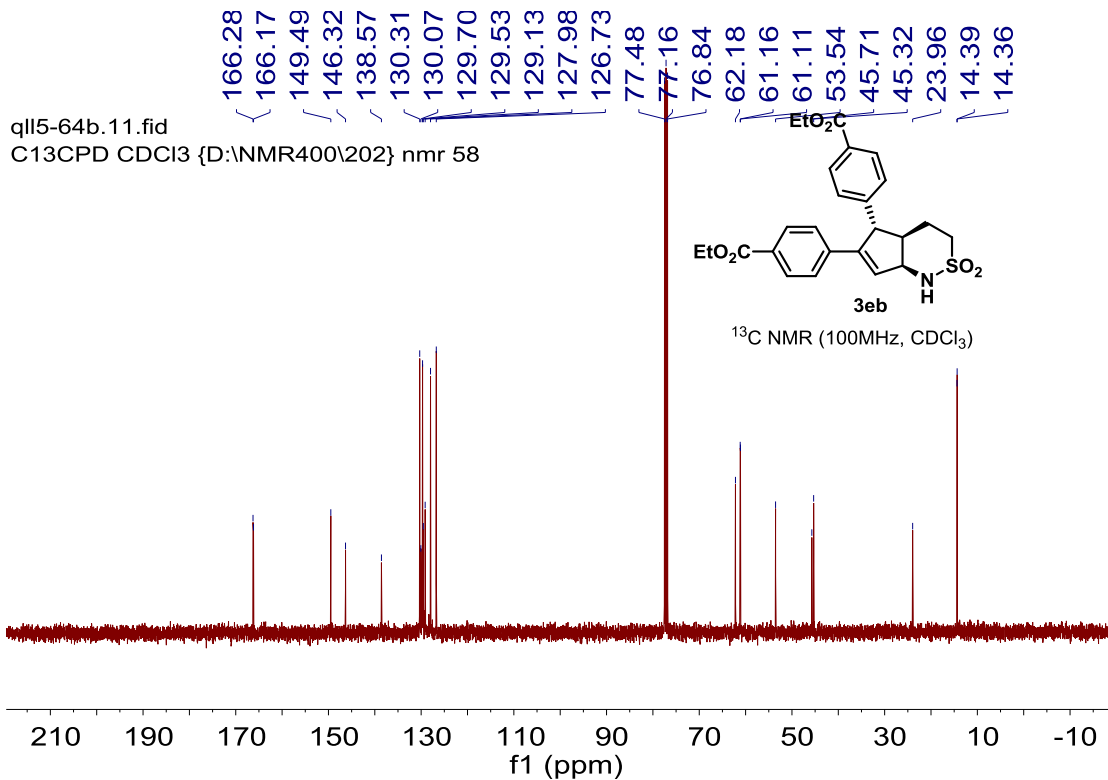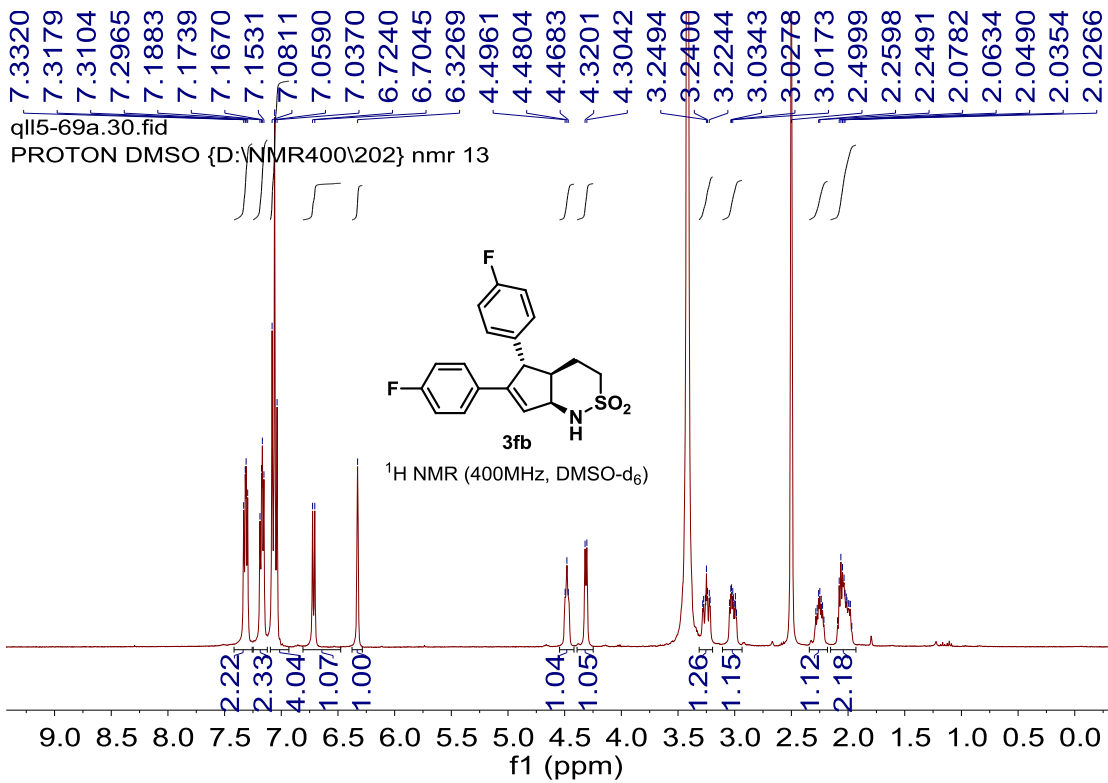



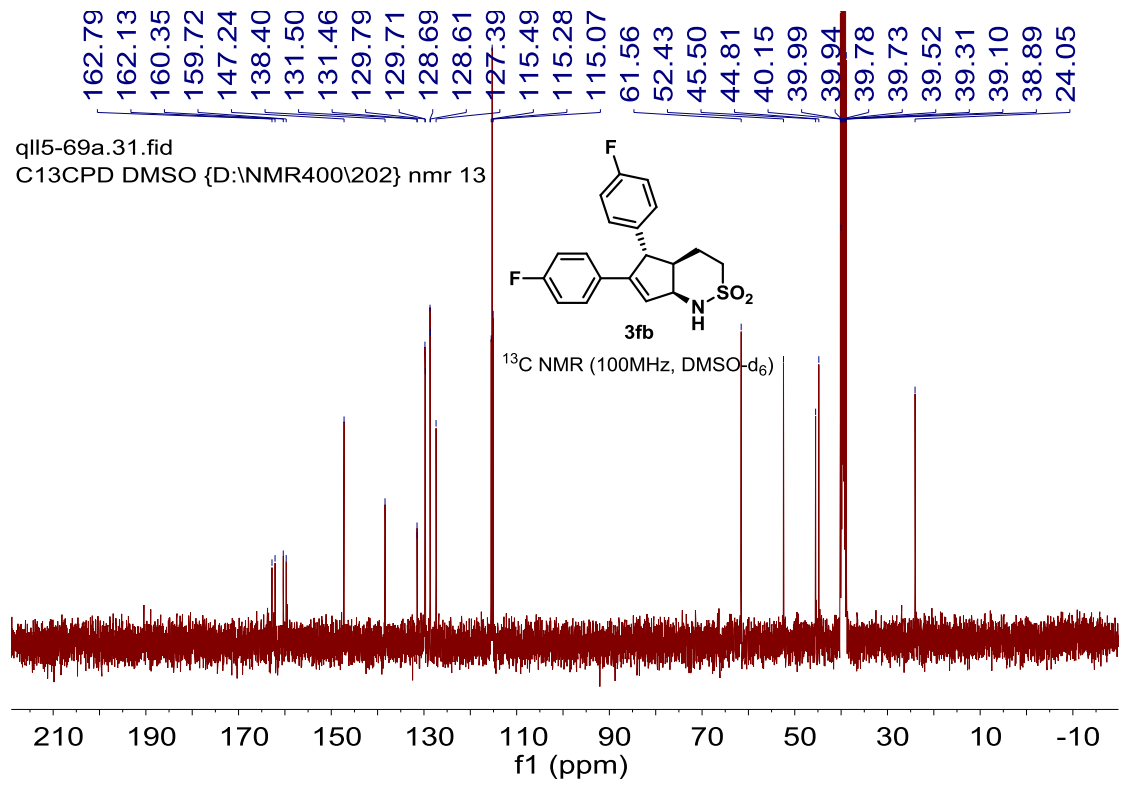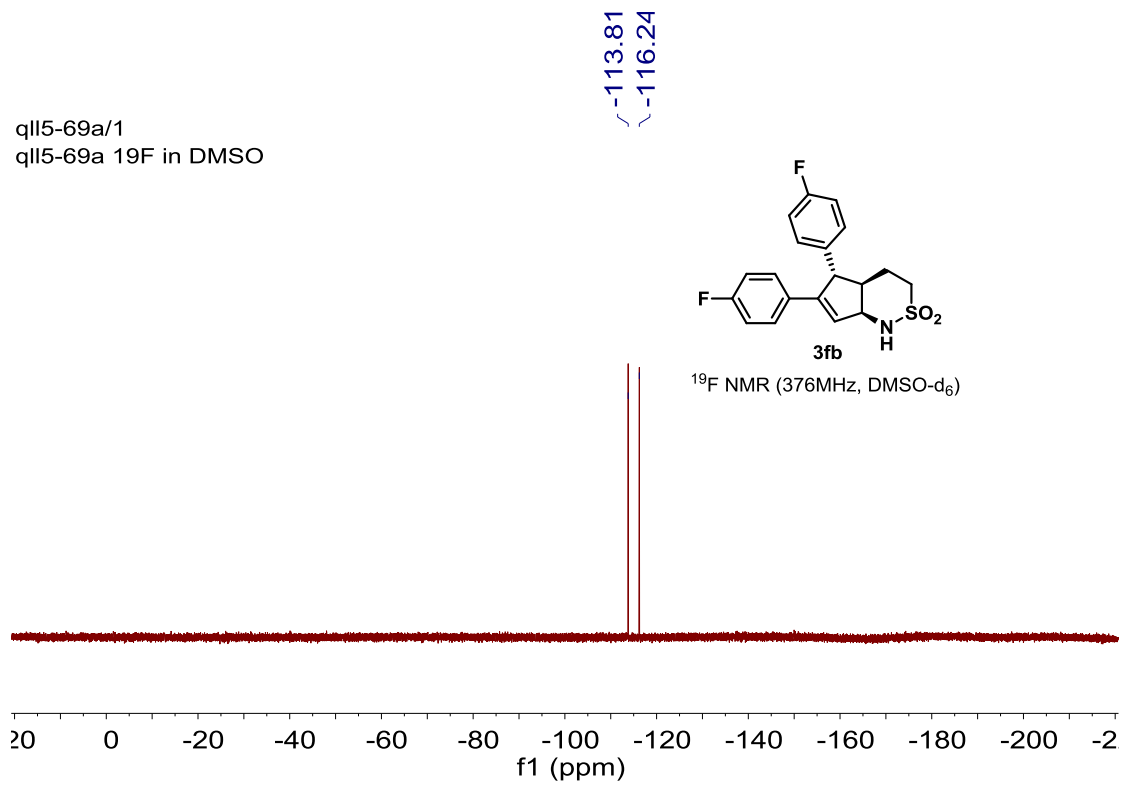

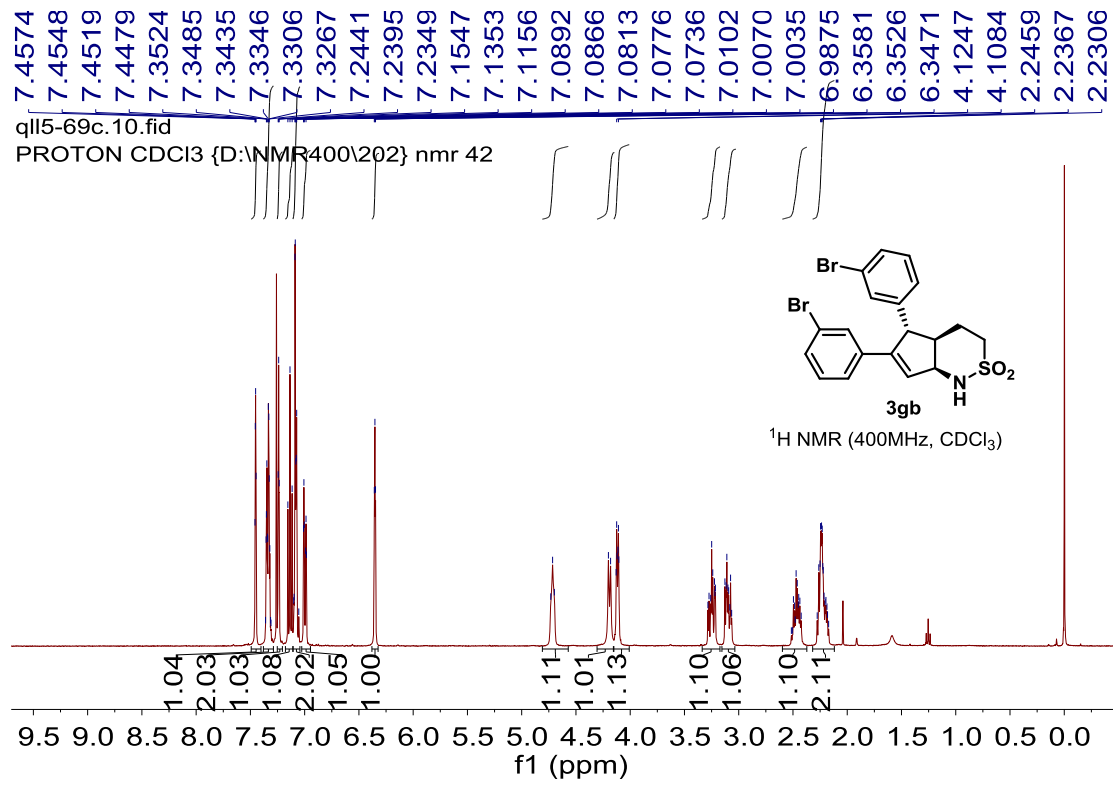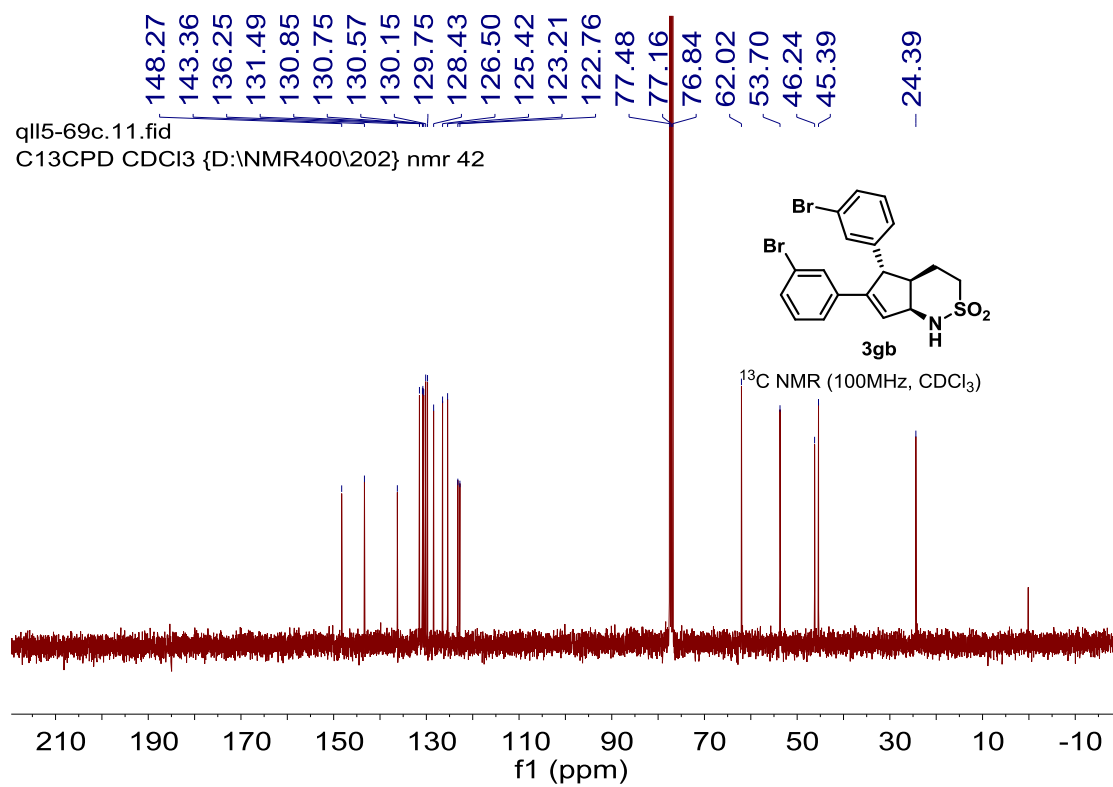

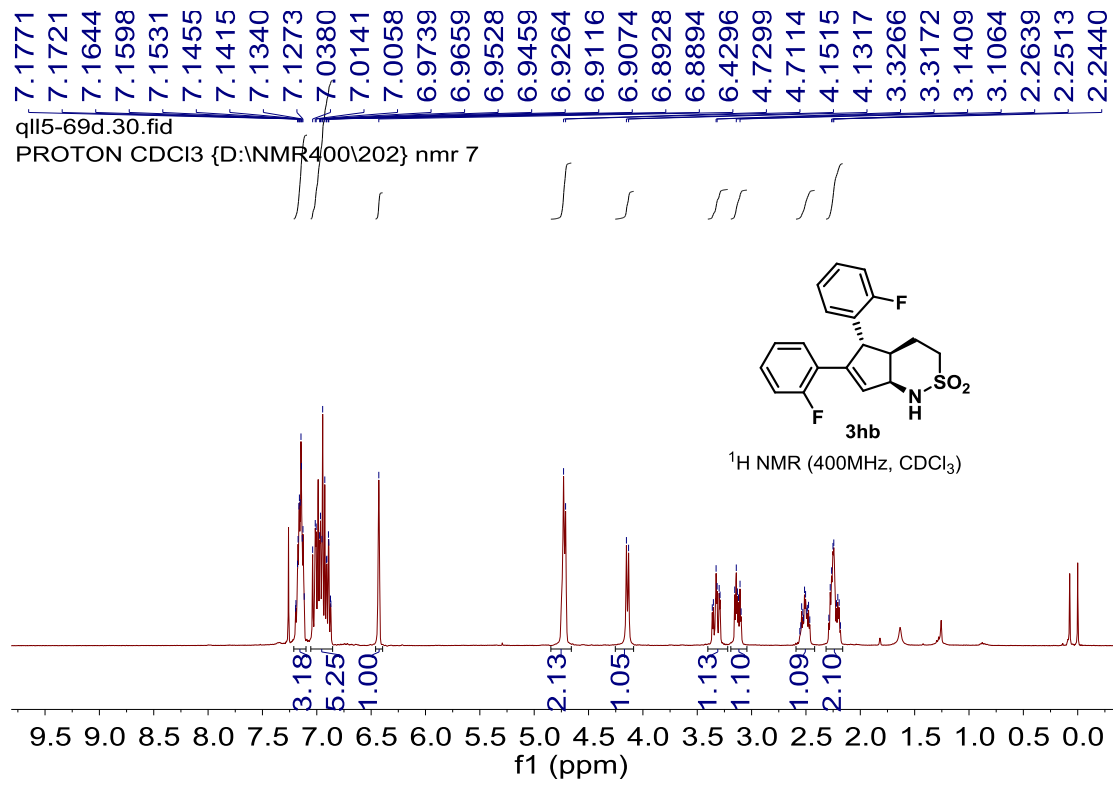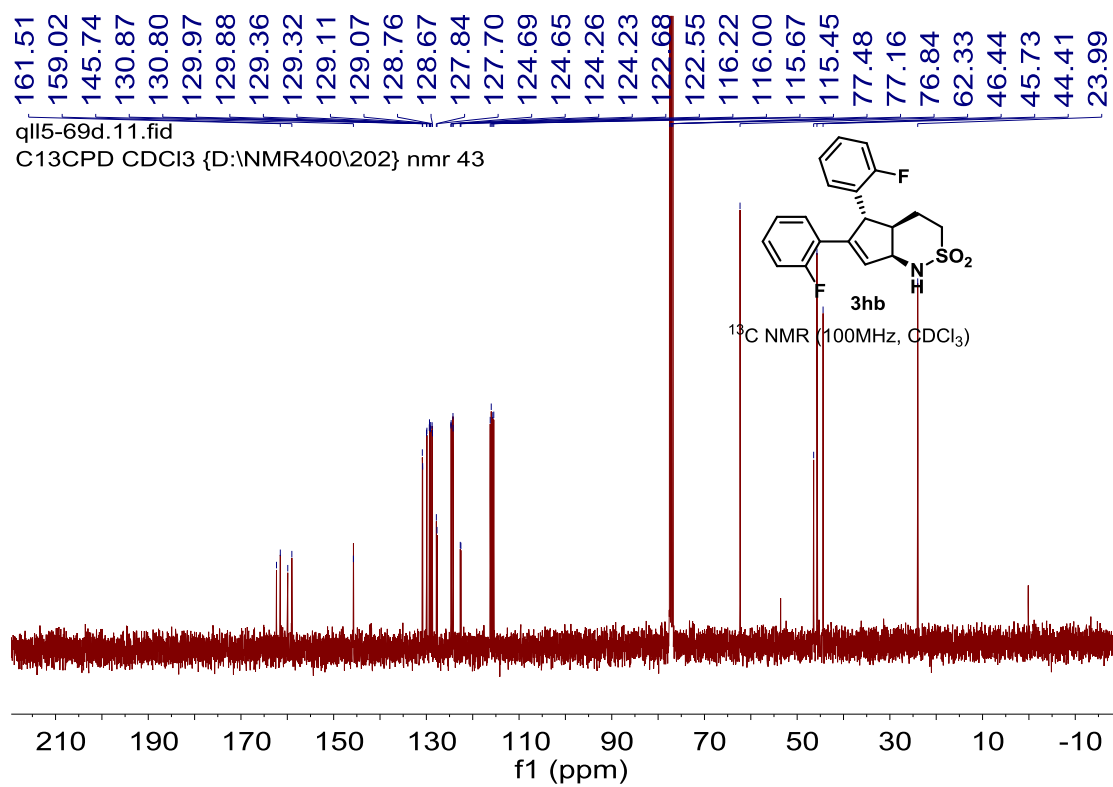

qll5-69d/1  
qll5-69D 19F in CDCl3

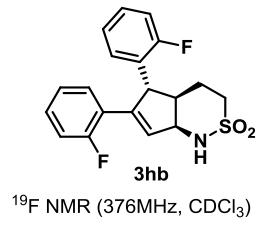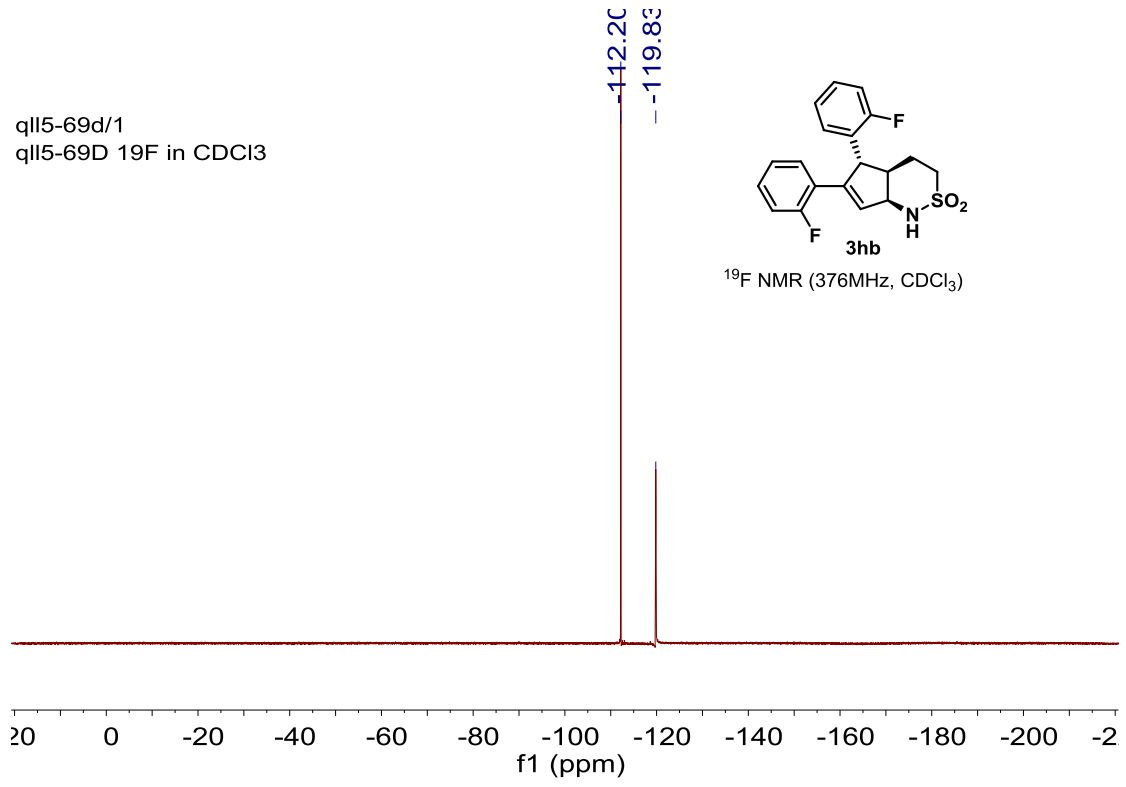

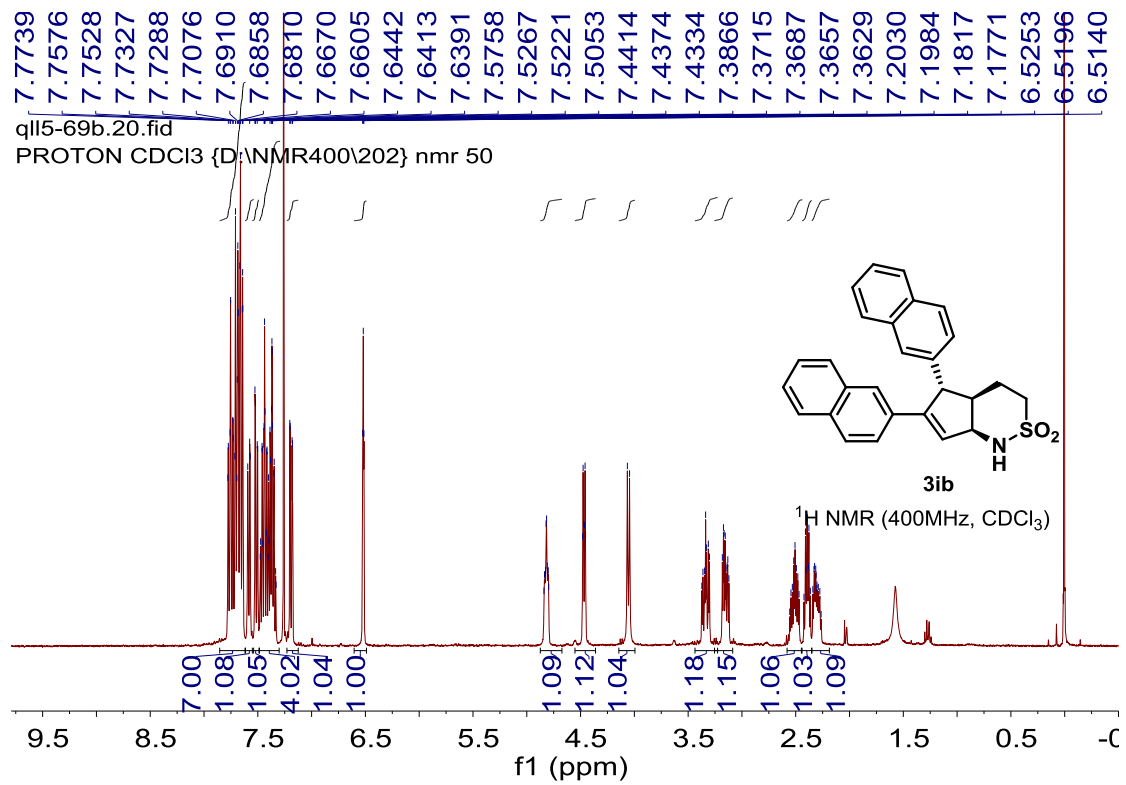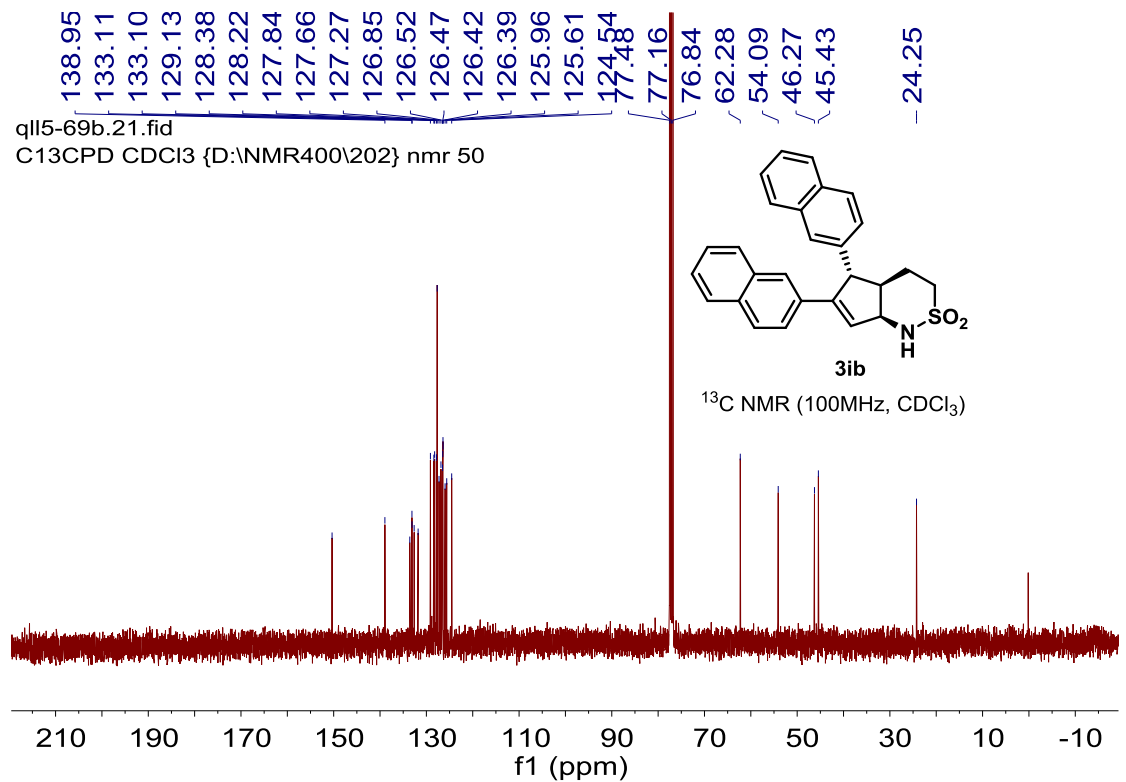

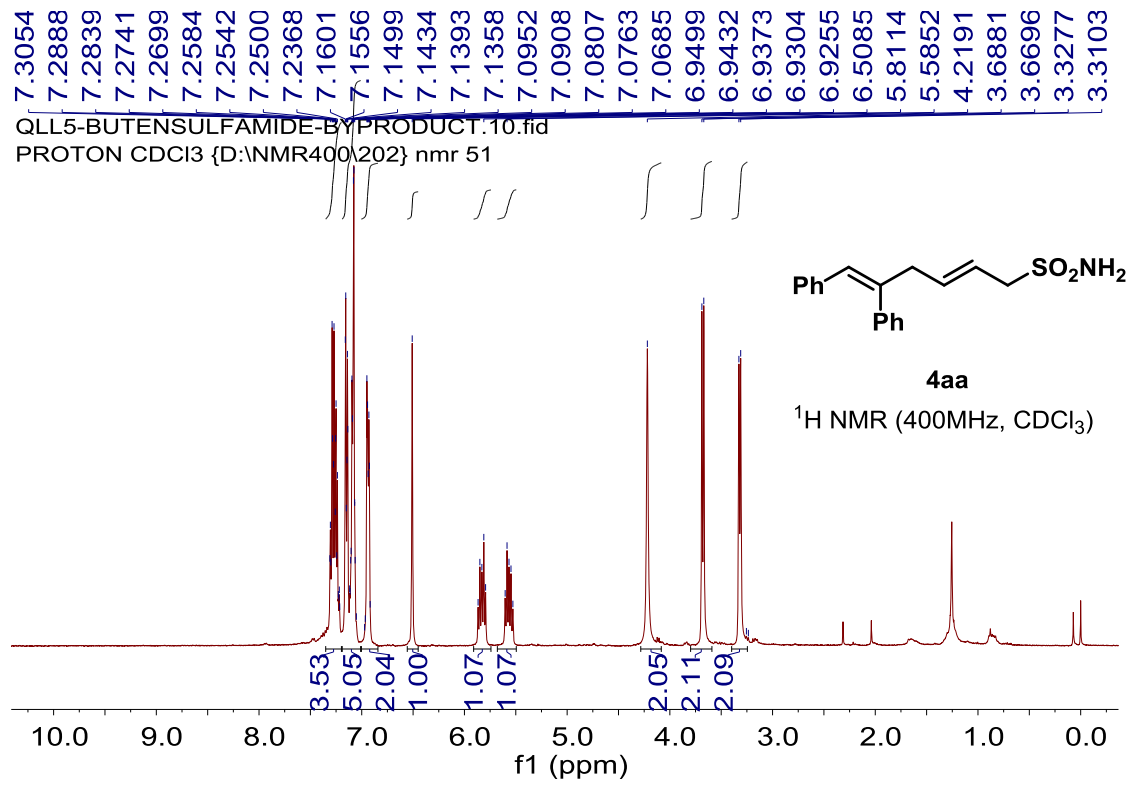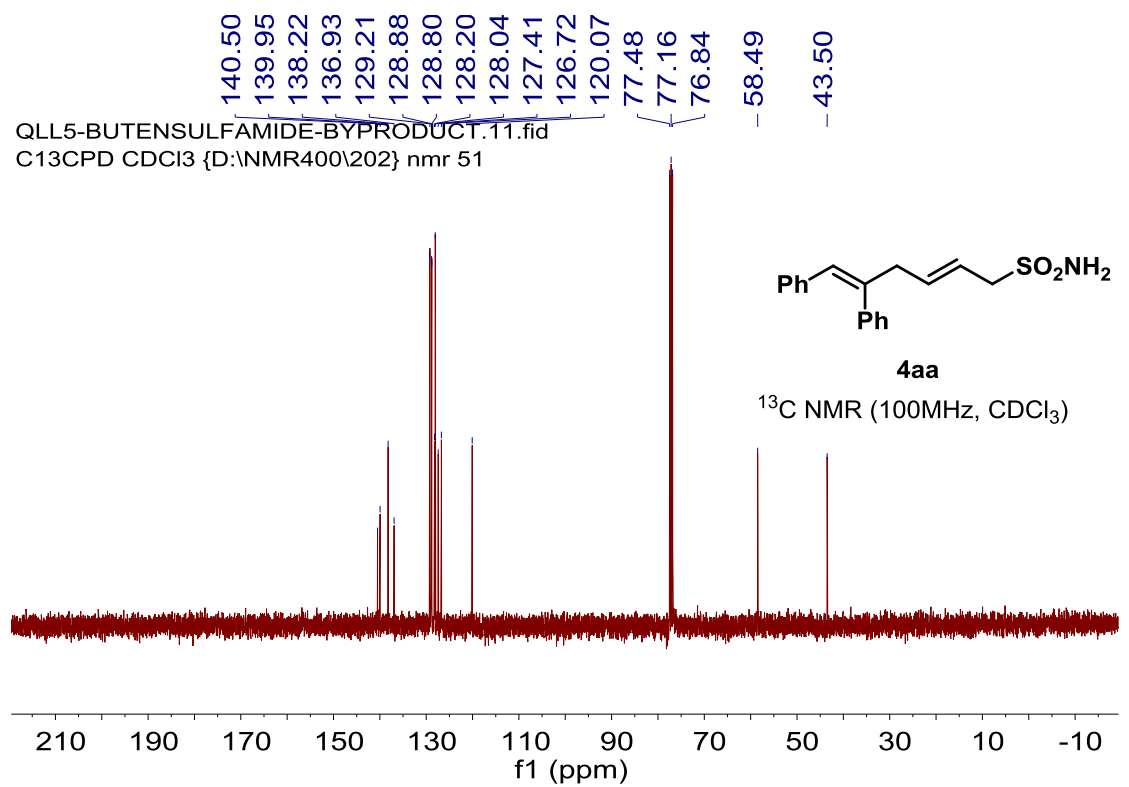

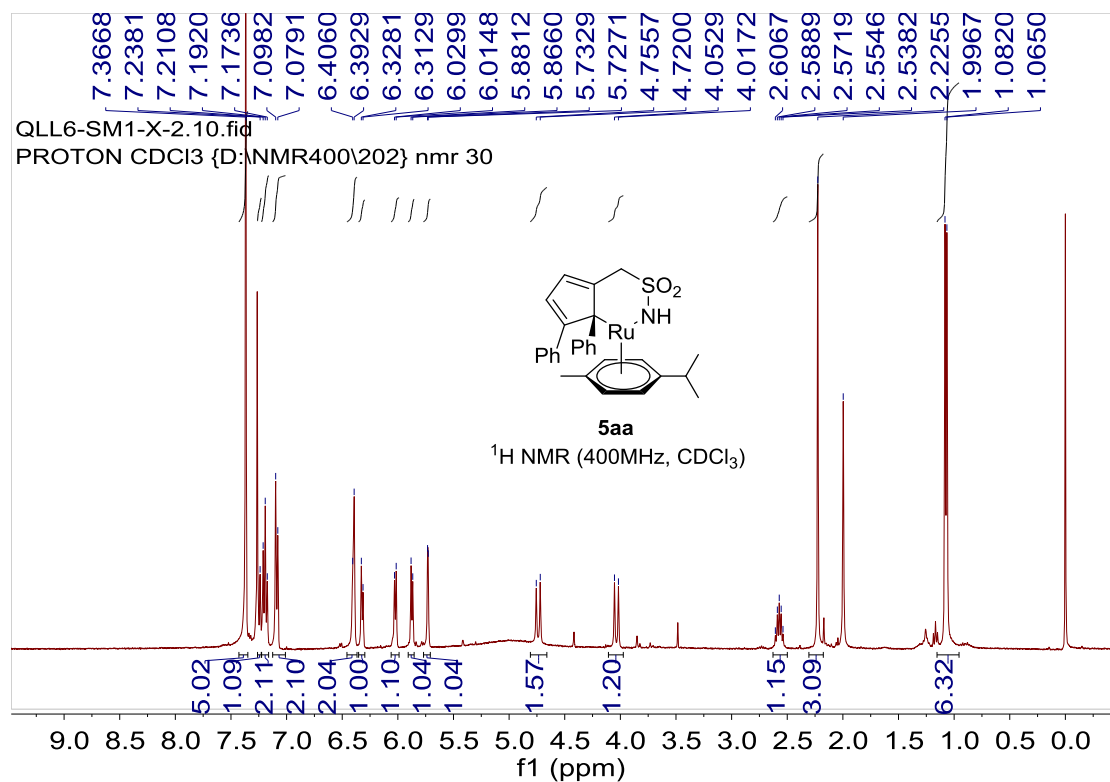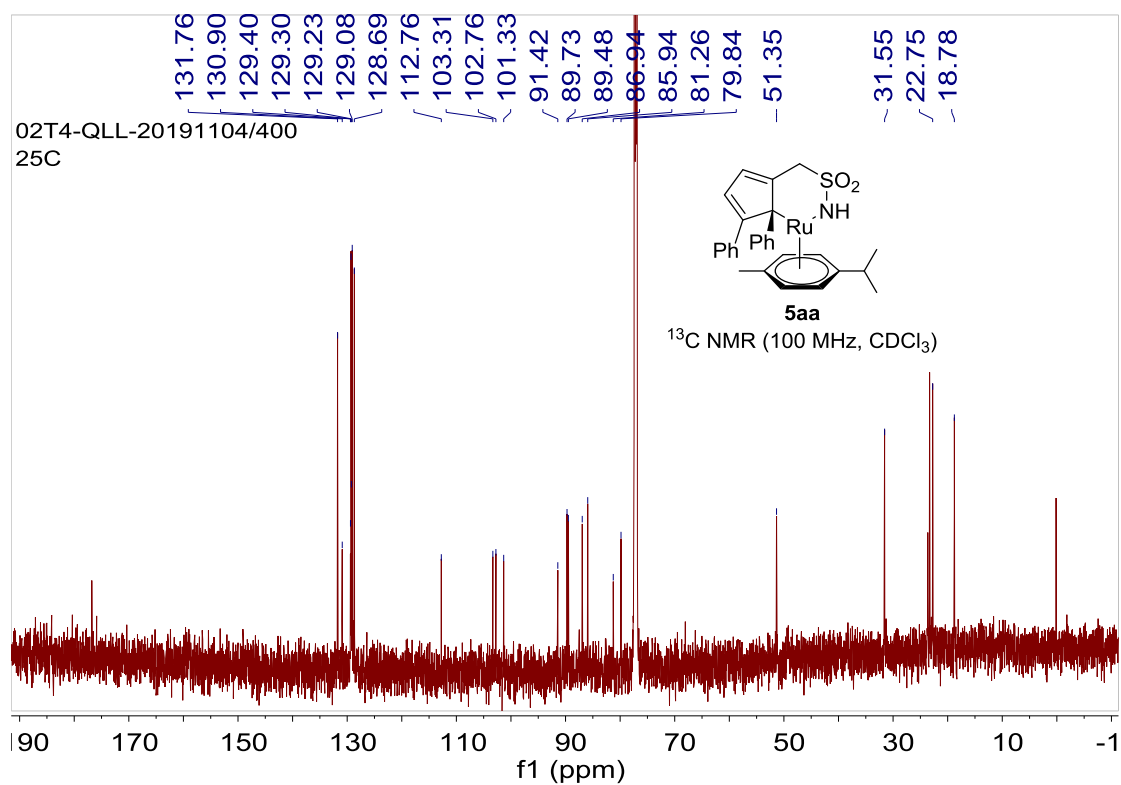

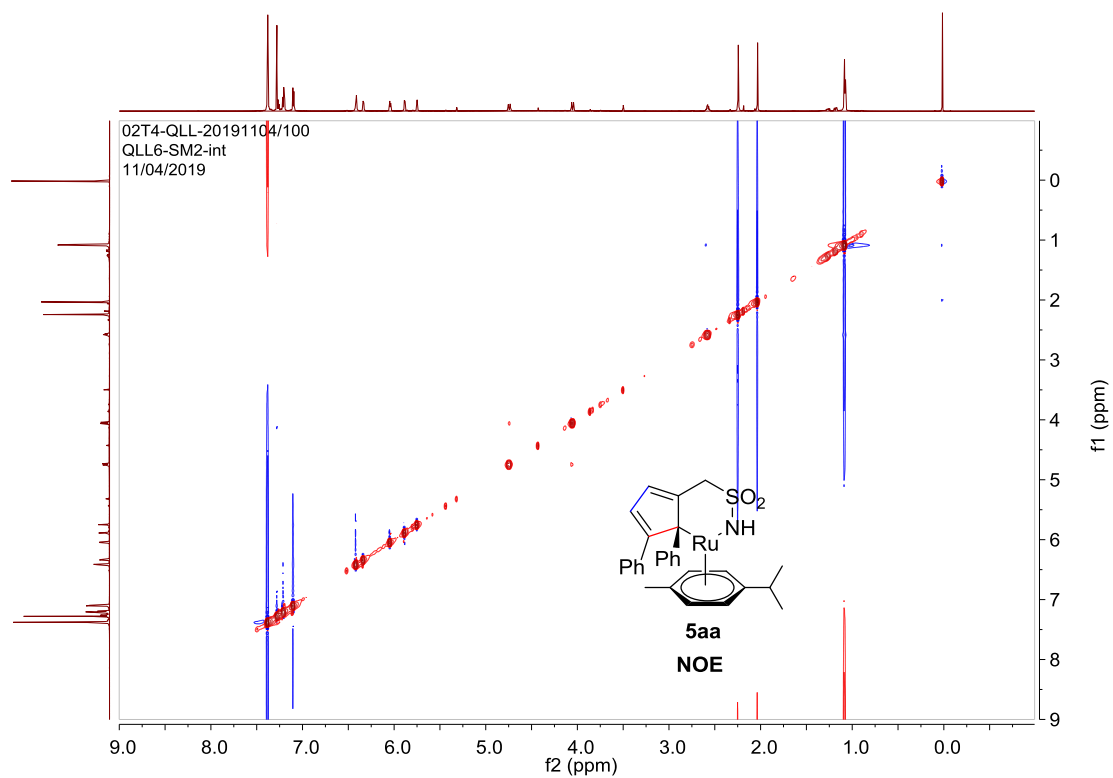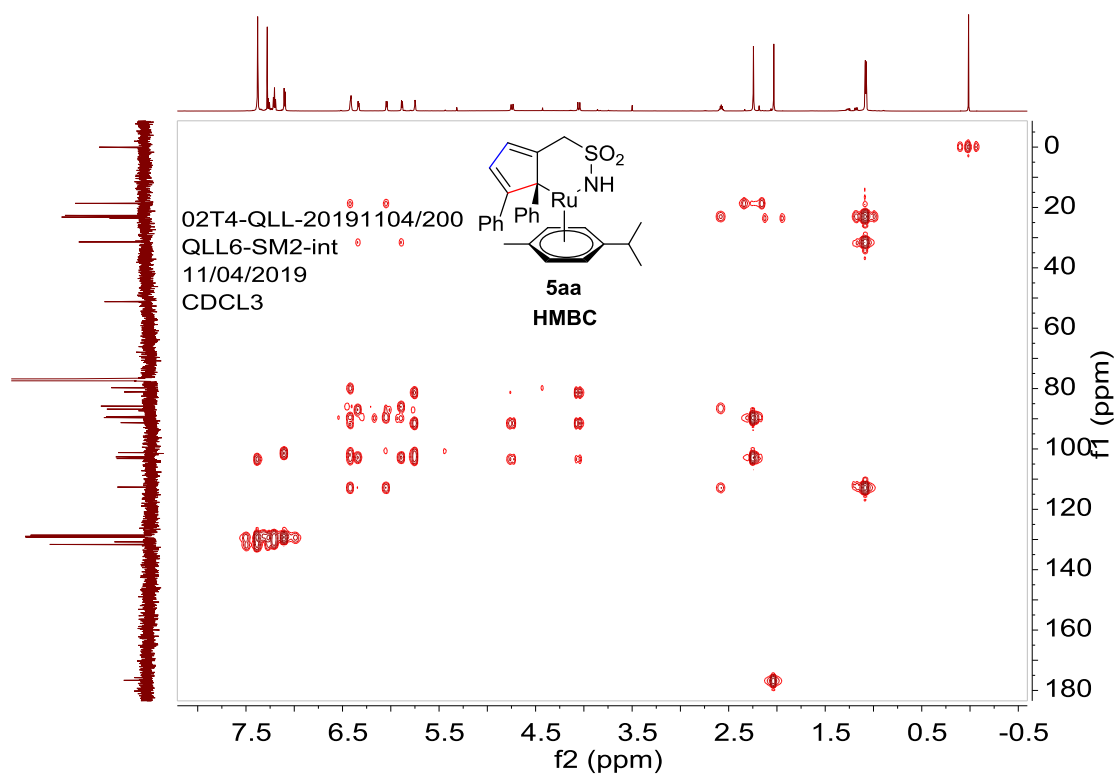



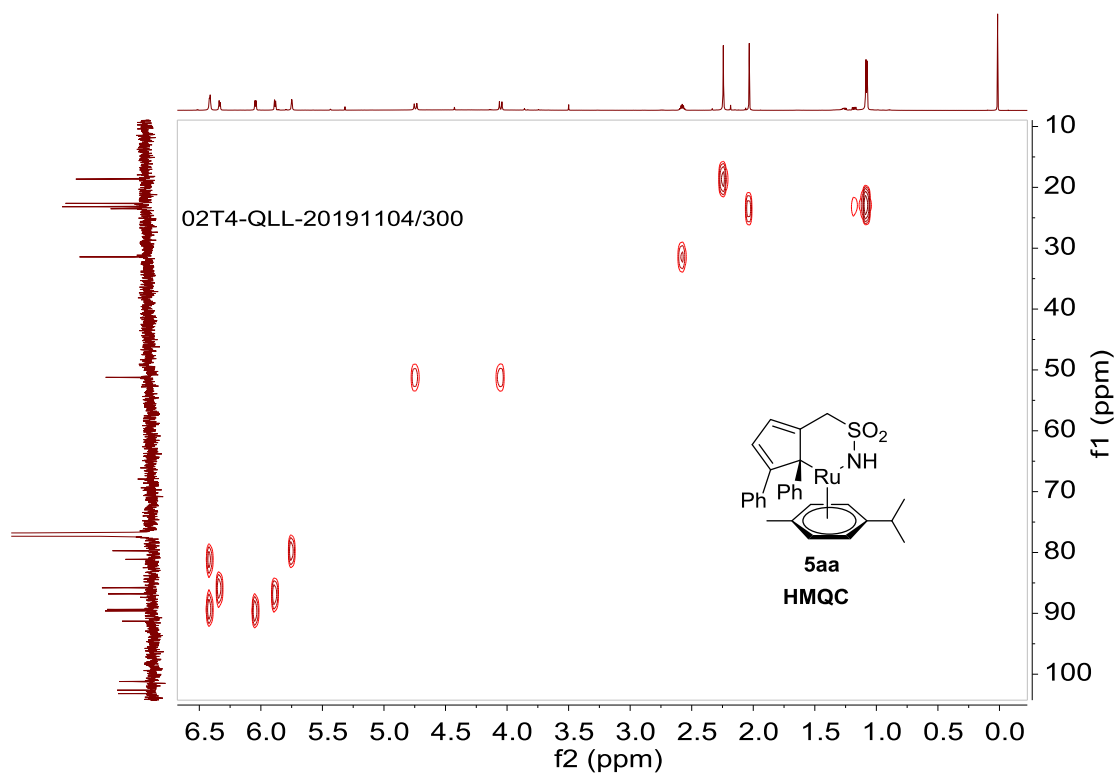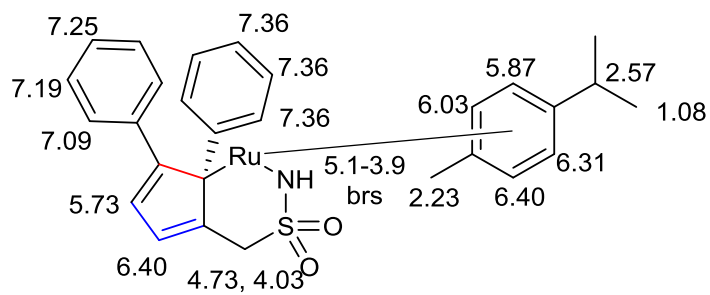

**5aa**

$^1\text{H}$  NMR (400MHz,  $\text{CDCl}_3$ )

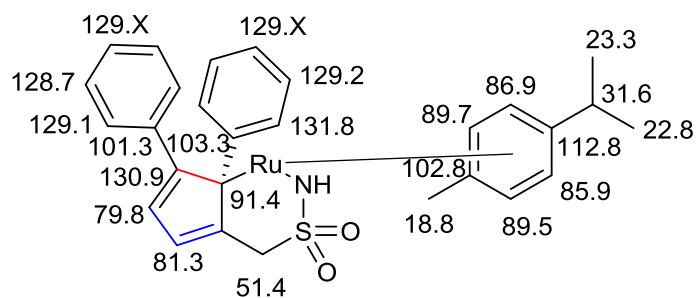

**5aa**

$^{13}\text{C}$  NMR (100 MHz,  $\text{CDCl}_3$ )
